# Supplementary material for: Inwardly rectifying potassium channels mediate polymyxin-induced nephrotoxicity
Source: Cell Mol Life Sci. 2022 May 15;79(6):296. doi: 10.1007/s00018-022-04316-z (PMC9108107; doi:10.1007/s00018-022-04316-z)
Supplement: Supplementary file 2 — Data file S1. sgRNA enrichment in CRISPR screening in HK-2 cells with 25 µM polymyxin B treatment for 14 days. This file includes read counts of sgRNAs (Worksheet 1) and gene rank with fold change and adjusted p-value (Worksheet 2) [file 18_2022_4316_MOESM2_ESM.xlsx]

## Sheet: Reads
sgRNA_Seq	sgRNA_Name	Gene	Plasmid_pool	Control_1	Control_2	Predrug_1	Predrug_2	Polymyxin_1	Polymyxin_2
CATCTTCTTTCACCTGAACG	A1BG_CATCTTCTTTCACCTGAACG	A1BG	181	863	786	868	761	849	2764
CTCCGGGGAGAACTCCGGCG	A1BG_CTCCGGGGAGAACTCCGGCG	A1BG	715	497	612	511	654	20	374
TCTCCATGGTGCATCAGCAC	A1BG_TCTCCATGGTGCATCAGCAC	A1BG	0	0	0	0	0	0	0
TGGAAGTCCACTCCACTCAG	A1BG_TGGAAGTCCACTCCACTCAG	A1BG	710	620	835	730	547	694	530
ACTGCATCTGTGCAAACGGG	A2M_ACTGCATCTGTGCAAACGGG	A2M	625	385	443	375	309	239	1099
ATGTCTCATGAACTACCCTG	A2M_ATGTCTCATGAACTACCCTG	A2M	675	1138	988	749	970	767	650
TGAAATGAAACTTCACACTG	A2M_TGAAATGAAACTTCACACTG	A2M	401	168	236	183	321	57	115
TTACTCATATAGGATCCCAA	A2M_TTACTCATATAGGATCCCAA	A2M	879	555	716	586	713	1362	654
CGGAAGACACAAGGCACCTG	NAT1_CGGAAGACACAAGGCACCTG	NAT1	69	335	447	341	336	303	958
GAACCTTAACATCCATTGTG	NAT1_GAACCTTAACATCCATTGTG	NAT1	804	677	618	689	613	106	188
GTTGTGAGAAGAAATCGGGG	NAT1_GTTGTGAGAAGAAATCGGGG	NAT1	281	215	340	216	228	160	754
TTGGACGCTCATACCAGATG	NAT1_TTGGACGCTCATACCAGATG	NAT1	463	776	844	534	691	277	300
ATTGTAAGAAGAAACCGGGG	NAT2_ATTGTAAGAAGAAACCGGGG	NAT2	459	209	340	521	358	362	323
TAACAAATACAGCACTGGCA	NAT2_TAACAAATACAGCACTGGCA	NAT2	407	800	630	607	575	531	245
TAGAGGCTGCCACATCTGGG	NAT2_TAGAGGCTGCCACATCTGGG	NAT2	387	624	765	652	709	186	142
TGTGGTCTGAAAACCGATTG	NAT2_TGTGGTCTGAAAACCGATTG	NAT2	591	605	702	502	640	196	229
CCCAAGATACTCATCAGTCA	SERPINA3_CCCAAGATACTCATCAGTCA	SERPINA3	515	400	359	410	312	89	302
CGTTGGCGGAGGCTAATCCG	SERPINA3_CGTTGGCGGAGGCTAATCCG	SERPINA3	888	428	910	511	704	51	569
GAGTTGCTCTTTGACAAACA	SERPINA3_GAGTTGCTCTTTGACAAACA	SERPINA3	156	401	407	512	375	715	140
GTGGTGGAGCTGAAGTACAC	SERPINA3_GTGGTGGAGCTGAAGTACAC	SERPINA3	491	320	440	297	252	1111	148
AAGTCTGAAGCACTAAGAAG	AADAC_AAGTCTGAAGCACTAAGAAG	AADAC	994	575	917	565	974	238	601
ATGTATATAATGCCTTAAGG	AADAC_ATGTATATAATGCCTTAAGG	AADAC	314	414	630	348	591	1033	148
ATTTCTATCCAAATCACTCA	AADAC_ATTTCTATCCAAATCACTCA	AADAC	683	451	813	506	709	428	265
GGTATTTCTGGAGATAGTGC	AADAC_GGTATTTCTGGAGATAGTGC	AADAC	625	270	436	201	256	129	198
AAGATGACAAAGCCTTCGTA	AAMP_AAGATGACAAAGCCTTCGTA	AAMP	847	30	65	152	64	11	0
AGGTGACCTCGCTATCGTCG	AAMP_AGGTGACCTCGCTATCGTCG	AAMP	782	545	742	507	586	550	224
TGAGTGGCCTCTTGAAAGTG	AAMP_TGAGTGGCCTCTTGAAAGTG	AAMP	716	30	154	59	95	0	26
TGGATGTGGAAAGTCCCGAA	AAMP_TGGATGTGGAAAGTCCCGAA	AAMP	716	128	45	113	122	3	1
ACCTTCACGCTCGATCTCAA	AANAT_ACCTTCACGCTCGATCTCAA	AANAT	533	567	718	631	589	151	274
GCCCTCCTCGAACCAGCCCA	AANAT_GCCCTCCTCGAACCAGCCCA	AANAT	834	867	1123	945	997	232	1279
GGTGAGGCAGCGAAACTCAC	AANAT_GGTGAGGCAGCGAAACTCAC	AANAT	588	885	789	858	593	1835	421
GTGGCGCCGCTGACAGCTCG	AANAT_GTGGCGCCGCTGACAGCTCG	AANAT	1319	1989	1600	1289	1272	1878	1286
CCAAGAAAAGCATTGACACA	AARS_CCAAGAAAAGCATTGACACA	AARS	520	27	29	12	37	26	0
GGAGGCCAGATCTATGACGA	AARS_GGAGGCCAGATCTATGACGA	AARS	1124	2	39	12	41	5	1
TCAGAATGTGCGTAGCTGTG	AARS_TCAGAATGTGCGTAGCTGTG	AARS	999	38	11	79	3	0	0
TTGGTGCTGAGGATGCCGAT	AARS_TTGGTGCTGAGGATGCCGAT	AARS	832	181	105	281	108	175	116
CCTTAAAGACCATCTTCATG	ABAT_CCTTAAAGACCATCTTCATG	ABAT	255	58	187	155	200	6	396
GAAAGAAGTCATCGGATGCG	ABAT_GAAAGAAGTCATCGGATGCG	ABAT	191	539	298	357	406	253	436
GTGAATGGCTTTAGAGTGCG	ABAT_GTGAATGGCTTTAGAGTGCG	ABAT	136	559	650	403	456	1584	90
TGCAATTACGAAGAGAGCCG	ABAT_TGCAATTACGAAGAGAGCCG	ABAT	208	398	235	57	213	129	36
AATGCAGAGAAAGCTATCTG	ABCA1_AATGCAGAGAAAGCTATCTG	ABCA1	675	549	422	485	517	876	202
GGACACGCCCAGCTTCAAGT	ABCA1_GGACACGCCCAGCTTCAAGT	ABCA1	478	353	230	301	347	3738	78
GTGGCATGGCAGGACTACGT	ABCA1_GTGGCATGGCAGGACTACGT	ABCA1	161	186	75	118	134	20	59
TTGGACAGCCCAAGACATCG	ABCA1_TTGGACAGCCCAAGACATCG	ABCA1	169	573	519	264	402	58	380
CATGTACGTGGCGATCCGAG	ABCA2_CATGTACGTGGCGATCCGAG	ABCA2	521	185	654	211	497	61	296
CTTGTGTGGCAACAACCGGT	ABCA2_CTTGTGTGGCAACAACCGGT	ABCA2	53	270	129	126	111	45	26
GATGTCGTGCCCGTAGATGG	ABCA2_GATGTCGTGCCCGTAGATGG	ABCA2	301	91	306	238	306	503	40
TAGGGGATGAAATTGCCACG	ABCA2_TAGGGGATGAAATTGCCACG	ABCA2	110	214	116	204	104	234	119
AATGCGCATTTACTGACCGA	ABCA3_AATGCGCATTTACTGACCGA	ABCA3	730	371	827	615	762	249	61
ACCTACGGTTCAGTTACACA	ABCA3_ACCTACGGTTCAGTTACACA	ABCA3	610	589	566	565	478	250	435
AGTGGACGGGCATACATCAG	ABCA3_AGTGGACGGGCATACATCAG	ABCA3	1423	1016	1276	616	1218	1922	585
CCTCCTGAGTCCCGTCAACG	ABCA3_CCTCCTGAGTCCCGTCAACG	ABCA3	96	445	281	511	198	345	62
AGTCATTAAAAAGTATCACA	ABCB7_AGTCATTAAAAAGTATCACA	ABCB7	216	148	163	358	255	118	23
CACACCACAGACAGCTACCG	ABCB7_CACACCACAGACAGCTACCG	ABCB7	425	100	16	168	191	0	14
GATTAAATACCAAAGCACTC	ABCB7_GATTAAATACCAAAGCACTC	ABCB7	720	66	84	265	362	2	25
TCACAGTTGCAGTCACACGG	ABCB7_TCACAGTTGCAGTCACACGG	ABCB7	196	0	0	38	71	0	0
CTGCAGAGGCCAAAGCACGG	ABCF1_CTGCAGAGGCCAAAGCACGG	ABCF1	410	17	32	9	93	0	0
GATGGAGTATGAGCGCCAAG	ABCF1_GATGGAGTATGAGCGCCAAG	ABCF1	697	87	188	157	145	140	6
GCAACACATCAATGTTGGGA	ABCF1_GCAACACATCAATGTTGGGA	ABCF1	604	57	57	193	116	65	12
TGTAATTGCCCCTATAGTAG	ABCF1_TGTAATTGCCCCTATAGTAG	ABCF1	269	1	1	42	21	0	8
AAAGACCGAGCCCCTAACAG	ABCA4_AAAGACCGAGCCCCTAACAG	ABCA4	580	334	385	243	363	406	150
AGCACCATACCCGCAAACAG	ABCA4_AGCACCATACCCGCAAACAG	ABCA4	386	242	234	279	281	321	141
AGGGTGTTGAGTTGCCACAG	ABCA4_AGGGTGTTGAGTTGCCACAG	ABCA4	19	295	328	356	252	1111	299
GATCCGAATGGACATAGACG	ABCA4_GATCCGAATGGACATAGACG	ABCA4	360	172	176	110	134	14	21
CTTAGGCTATAATCACAATG	ABL1_CTTAGGCTATAATCACAATG	ABL1	522	758	919	696	912	1129	839
GGTTCATCATCATTCAACGG	ABL1_GGTTCATCATCATTCAACGG	ABL1	534	615	539	344	592	330	114
TCAGTGATGATATAGAACGG	ABL1_TCAGTGATGATATAGAACGG	ABL1	873	323	619	403	590	454	108
TTGCTCCCTCGAAAAGAGCG	ABL1_TTGCTCCCTCGAAAAGAGCG	ABL1	1021	1124	1350	638	860	728	443
CAGACCAAGTACCTCGATGT	AOC1_CAGACCAAGTACCTCGATGT	AOC1	229	381	453	268	215	227	506
GCTGTATGATAAGCCAACTG	AOC1_GCTGTATGATAAGCCAACTG	AOC1	152	110	341	88	237	415	250
GGCAACGCTGTGCTCTACGG	AOC1_GGCAACGCTGTGCTCTACGG	AOC1	264	467	559	345	392	1795	233
GTGGCTTCAACTTCTATGCG	AOC1_GTGGCTTCAACTTCTATGCG	AOC1	317	263	260	212	281	124	207
AACCTCTGTAATGACGACGG	ABL2_AACCTCTGTAATGACGACGG	ABL2	444	341	510	468	536	603	548
GGTTCAACATCACAACCATA	ABL2_GGTTCAACATCACAACCATA	ABL2	571	691	561	520	377	100	203
TATCGAATGGAACAGCCTGA	ABL2_TATCGAATGGAACAGCCTGA	ABL2	500	428	457	327	334	2233	710
TGTACACCATCACTCCACAG	ABL2_TGTACACCATCACTCCACAG	ABL2	344	596	395	251	213	1255	272
AGCCAAAGGTGCTGACACCG	ABO_AGCCAAAGGTGCTGACACCG	ABO	215	564	787	409	678	478	173
ATGGAGTTCCGCGACCACGT	ABO_ATGGAGTTCCGCGACCACGT	ABO	74	733	649	449	674	503	221
CCGGTCCCCAGCGTCACGCG	ABO_CCGGTCCCCAGCGTCACGCG	ABO	387	313	382	360	178	105	1362
TGATCAGTGACTTCTGCGAG	ABO_TGATCAGTGACTTCTGCGAG	ABO	473	330	561	505	528	738	673
CAAGAGTGAAATCCAGAAGG	ABR_CAAGAGTGAAATCCAGAAGG	ABR	516	267	569	454	552	119	334
CTGCAGTGACAACGCCCAAG	ABR_CTGCAGTGACAACGCCCAAG	ABR	256	284	306	291	211	82	99
GAGGCTTGACACTCACGTGT	ABR_GAGGCTTGACACTCACGTGT	ABR	651	417	455	448	390	66	113
TACTGTCCTCGGACTACGAG	ABR_TACTGTCCTCGGACTACGAG	ABR	608	413	283	486	236	85	72
AGCGCGAAGTAATATTTCCA	ACAA1_AGCGCGAAGTAATATTTCCA	ACAA1	154	123	239	122	258	98	99
CTGCCGAGAGAAGCTCGTCG	ACAA1_CTGCCGAGAGAAGCTCGTCG	ACAA1	270	639	590	632	570	355	58
GCCCTTGTCATCATGGACCG	ACAA1_GCCCTTGTCATCATGGACCG	ACAA1	325	378	443	502	415	524	336
TCAATAGACAGTGTTCGTCG	ACAA1_TCAATAGACAGTGTTCGTCG	ACAA1	1109	750	542	733	366	610	303
AATGCATGCGGTCTATCCGT	ACACA_AATGCATGCGGTCTATCCGT	ACACA	431	10	25	117	34	0	6
CCAGAGTCCCACATTCCCTG	ACACA_CCAGAGTCCCACATTCCCTG	ACACA	567	81	87	45	177	4	9
TATTTGCCTAGGTACCGAAG	ACACA_TATTTGCCTAGGTACCGAAG	ACACA	274	79	66	57	150	5	4
TGATGGGTCCATGATAACCG	ACACA_TGATGGGTCCATGATAACCG	ACACA	1042	22	0	0	10	0	0
AAAGCGTGTGACAAACTCAG	ACACB_AAAGCGTGTGACAAACTCAG	ACACB	410	176	175	132	198	1069	98
ACAACGACATCGACACCGGG	ACACB_ACAACGACATCGACACCGGG	ACACB	964	777	832	870	708	220	506
GAACTCGAATATGGCCAGCG	ACACB_GAACTCGAATATGGCCAGCG	ACACB	567	324	330	159	256	223	54
GTCGGAGTCCATAATCCACA	ACACB_GTCGGAGTCCATAATCCACA	ACACB	757	273	186	373	207	127	24
CAGAAAAAGGCTAATACCAT	ACADL_CAGAAAAAGGCTAATACCAT	ACADL	432	277	558	379	723	384	601
CTCCTCCCAGACAATAGCTG	ACADL_CTCCTCCCAGACAATAGCTG	ACADL	508	522	468	349	387	483	957
GCCACTTACTCTGAGTGATG	ACADL_GCCACTTACTCTGAGTGATG	ACADL	123	331	373	328	345	100	565
TAAAATGGGATTAAAAGCCC	ACADL_TAAAATGGGATTAAAAGCCC	ACADL	214	307	231	261	205	909	235
AAGATGTGGATAACCAACGG	ACADM_AAGATGTGGATAACCAACGG	ACADM	326	365	356	356	325	135	688
AATTGGCTTATGGATGTACA	ACADM_AATTGGCTTATGGATGTACA	ACADM	409	634	725	732	637	818	54
ATTGTGGAAGCAGATACCCC	ACADM_ATTGTGGAAGCAGATACCCC	ACADM	104	309	393	362	454	202	1434
GTATTTGGGGAGAATGACTG	ACADM_GTATTTGGGGAGAATGACTG	ACADM	209	520	310	376	304	146	234
ACACACCATCTACCAGTCTG	ACADS_ACACACCATCTACCAGTCTG	ACADS	558	1316	1334	1190	1192	1407	816
GACACTCATGATGACTCCGG	ACADS_GACACTCATGATGACTCCGG	ACADS	718	478	486	229	511	186	580
GGCAGGTACCTGGTTCGCTG	ACADS_GGCAGGTACCTGGTTCGCTG	ACADS	602	480	553	450	446	854	2271
TAAGGAACATCTCTTCCCAG	ACADS_TAAGGAACATCTCTTCCCAG	ACADS	373	407	449	280	317	114	92
AGCCAAAGTTGATGCATCTG	ACADSB_AGCCAAAGTTGATGCATCTG	ACADSB	812	320	265	359	336	234	6
ATGGAGAAATCAGTAATACA	ACADSB_ATGGAGAAATCAGTAATACA	ACADSB	283	317	451	286	235	505	115
ATTGAGTAGAGCTTCTGACT	ACADSB_ATTGAGTAGAGCTTCTGACT	ACADSB	183	158	260	155	175	268	307
TTCGAATGTTAACGGGCAGG	ACADSB_TTCGAATGTTAACGGGCAGG	ACADSB	374	281	299	349	245	261	54
CACTAATCGTACCCAGTTTG	ACADVL_CACTAATCGTACCCAGTTTG	ACADVL	428	362	415	366	292	20	33
GTCTAACCGAGCCCTCAAGC	ACADVL_GTCTAACCGAGCCCTCAAGC	ACADVL	245	61	199	46	104	49	95
GTGGAGGAGACCACTTGGCA	ACADVL_GTGGAGGAGACCACTTGGCA	ACADVL	154	238	268	206	236	290	235
TCCTGGTCAGAGCGTCAGAG	ACADVL_TCCTGGTCAGAGCGTCAGAG	ACADVL	172	259	192	242	281	165	186
CTGCCTAAAAAAGATCCAAT	ACAT1_CTGCCTAAAAAAGATCCAAT	ACAT1	172	271	225	264	229	37	93
GAAGTGAAAGAAGCATACAT	ACAT1_GAAGTGAAAGAAGCATACAT	ACAT1	29	154	241	63	231	18	352
GAGGATCAACACCATATGGT	ACAT1_GAGGATCAACACCATATGGT	ACAT1	515	447	498	508	512	659	425
TTCTGCGCAGGATGTGATGG	ACAT1_TTCTGCGCAGGATGTGATGG	ACAT1	759	401	914	516	627	253	642
CCTGTTAGACAAGCCAGTGT	ACAT2_CCTGTTAGACAAGCCAGTGT	ACAT2	271	66	35	40	99	0	0
GCAGTCCAGTCAATAGGGAT	ACAT2_GCAGTCCAGTCAATAGGGAT	ACAT2	511	89	64	202	83	37	0
GTTCTCAAGTAAGCCAAGTG	ACAT2_GTTCTCAAGTAAGCCAAGTG	ACAT2	87	77	98	124	225	0	0
TCTATGTTGCTCCCATGGCG	ACAT2_TCTATGTTGCTCCCATGGCG	ACAT2	48	7	55	65	147	0	19
CTGGAGTTCCTGCACCGTGT	ASIC2_CTGGAGTTCCTGCACCGTGT	ASIC2	1152	1192	1387	776	949	906	4120
GAAGCCATTCAGGTTACAGA	ASIC2_GAAGCCATTCAGGTTACAGA	ASIC2	672	681	530	660	583	96	397
GAGGAAACGACATTTGAAGC	ASIC2_GAGGAAACGACATTTGAAGC	ASIC2	164	393	672	400	614	1359	136
TTTACAGCATCACCGCCTGT	ASIC2_TTTACAGCATCACCGCCTGT	ASIC2	466	1067	623	746	879	768	1608
AAGTGCTACACGTTCAACTC	ASIC1_AAGTGCTACACGTTCAACTC	ASIC1	961	516	780	344	753	1547	933
CCATGTCACCAAGCTCGACG	ASIC1_CCATGTCACCAAGCTCGACG	ASIC1	677	550	904	327	665	690	900
CTTCAGAGACAGCCGCTCGT	ASIC1_CTTCAGAGACAGCCGCTCGT	ASIC1	505	378	749	439	678	864	456
TGAGATACCAGACACACAGA	ASIC1_TGAGATACCAGACACACAGA	ASIC1	911	433	407	482	375	734	2246
GGTGTCCATGAACTACCGGG	ACHE_GGTGTCCATGAACTACCGGG	ACHE	0	158	109	181	122	91	0
TATGTGGACACCCTATACCC	ACHE_TATGTGGACACCCTATACCC	ACHE	163	180	222	210	174	83	60
TGGTGGGAATGACACAGAGC	ACHE_TGGTGGGAATGACACAGAGC	ACHE	336	347	304	365	409	79	25
TGTCCTCGTCTGGATCTATG	ACHE_TGTCCTCGTCTGGATCTATG	ACHE	1	370	231	271	264	135	553
AGAGCAATTCGAGATTACCA	ACLY_AGAGCAATTCGAGATTACCA	ACLY	255	251	247	279	348	39	92
CGGTCACCTGTACACGACAG	ACLY_CGGTCACCTGTACACGACAG	ACLY	351	219	214	272	421	30	4
GACCAGCTGATCAAACGTCG	ACLY_GACCAGCTGATCAAACGTCG	ACLY	429	362	389	432	543	60	169
GCCAGCGGGAGCACATCGGT	ACLY_GCCAGCGGGAGCACATCGGT	ACLY	314	316	218	304	115	1	9
CCTGCCCCTAACATCACAGA	ACO1_CCTGCCCCTAACATCACAGA	ACO1	481	456	601	524	390	634	705
CTTGGTGTCTAGGTTTGACG	ACO1_CTTGGTGTCTAGGTTTGACG	ACO1	458	350	394	311	244	1082	61
TTATTACCCAGACAGCCTCG	ACO1_TTATTACCCAGACAGCCTCG	ACO1	309	398	841	302	571	67	187
TTGCATATGCTATTACTAAG	ACO1_TTGCATATGCTATTACTAAG	ACO1	208	293	279	294	258	357	91
AAGCGCCCACACGAAATGGG	ACR_AAGCGCCCACACGAAATGGG	ACR	499	577	580	528	697	556	212
CCCCGACACTTACTCACACG	ACR_CCCCGACACTTACTCACACG	ACR	546	501	689	445	575	77	620
GAAAGCGCCTATGTGGTCGT	ACR_GAAAGCGCCTATGTGGTCGT	ACR	130	268	428	166	390	342	167
TAATGTGCATGACTGGAGAC	ACR_TAATGTGCATGACTGGAGAC	ACR	0	0	0	0	0	0	0
ATCTTCTCCGAGAGTGTCAG	ACO2_ATCTTCTCCGAGAGTGTCAG	ACO2	1340	1502	1669	1520	1320	776	1031
GTCTCAATAGGACATCAACC	ACO2_GTCTCAATAGGACATCAACC	ACO2	958	1418	1154	1115	987	1428	1302
GTGCAGCTACCAATTAGACC	ACO2_GTGCAGCTACCAATTAGACC	ACO2	1023	1161	1084	1071	1266	1338	2535
TCTCGGGGTTTGCGTCGTTG	ACO2_TCTCGGGGTTTGCGTCGTTG	ACO2	0	0	0	0	0	0	0
ACCTATCACCGGATTAACGA	ACOX1_ACCTATCACCGGATTAACGA	ACOX1	354	358	393	500	423	88	287
CTGTGGTTTCCAAGCCTCGA	ACOX1_CTGTGGTTTCCAAGCCTCGA	ACOX1	451	522	690	443	929	113	270
GCGCCGCCGAGAGATCGGTG	ACOX1_GCGCCGCCGAGAGATCGGTG	ACOX1	641	456	673	254	524	319	182
TGGCATTGAAGCATGTCGGA	ACOX1_TGGCATTGAAGCATGTCGGA	ACOX1	302	259	494	236	487	373	35
ACATAGTATATAATCAAATG	ACP1_ACATAGTATATAATCAAATG	ACP1	182	93	91	44	134	14	40
ACCCAGACACACAAACAGCA	ACP1_ACCCAGACACACAAACAGCA	ACP1	351	562	453	339	597	308	236
GGAACCCCCCTGACTACCGA	ACP1_GGAACCCCCCTGACTACCGA	ACP1	1379	1003	1368	1164	1309	244	3335
GGGGTTCCCTATCTCATACC	ACP1_GGGGTTCCCTATCTCATACC	ACP1	75	170	398	186	483	42	305
ACATGGTGGCCAACGAGACA	ACP2_ACATGGTGGCCAACGAGACA	ACP2	174	93	76	70	173	15	208
ACCAGTGAAGACATATCCCA	ACP2_ACCAGTGAAGACATATCCCA	ACP2	251	379	359	370	303	137	234
CACCTCTTATCACCGGCAAG	ACP2_CACCTCTTATCACCGGCAAG	ACP2	545	455	395	380	298	696	77
TTCTGCAGCTGCTCATAACG	ACP2_TTCTGCAGCTGCTCATAACG	ACP2	233	465	321	398	265	133	35
ACCCACGGCTACAAAGCGCA	ACP5_ACCCACGGCTACAAAGCGCA	ACP5	687	697	663	423	856	429	372
CTGGACACAGTGACACTATG	ACP5_CTGGACACAGTGACACTATG	ACP5	1718	1241	1197	1006	1209	1856	1128
GCTCGGCTATGGACCACACG	ACP5_GCTCGGCTATGGACCACACG	ACP5	627	666	501	587	480	478	208
GTACCAGGGCACTTTGCGAA	ACP5_GTACCAGGGCACTTTGCGAA	ACP5	441	377	223	357	199	19	56
AAAGGCAGGTATAGCAACTG	ACPP_AAAGGCAGGTATAGCAACTG	ACPP	307	427	704	516	660	806	311
ACTCCTTGGCTAGTACACTT	ACPP_ACTCCTTGGCTAGTACACTT	ACPP	501	662	759	361	571	649	32
CTACGACCCTTTATATTGTG	ACPP_CTACGACCCTTTATATTGTG	ACPP	444	296	377	312	433	597	223
GCCATGAGGATTCCTTTATG	ACPP_GCCATGAGGATTCCTTTATG	ACPP	657	423	469	428	481	187	167
CCTGACTCAAGCTCACTCAA	ACRV1_CCTGACTCAAGCTCACTCAA	ACRV1	477	202	370	184	340	42	196
GCTGAAGGTGAGCATACTGT	ACRV1_GCTGAAGGTGAGCATACTGT	ACRV1	460	195	337	220	271	59	174
TGGTTCAAGCAAGCACACTG	ACRV1_TGGTTCAAGCAAGCACACTG	ACRV1	989	946	1002	988	1127	377	1173
TTCAGGTGAGCACGCTTCAG	ACRV1_TTCAGGTGAGCACGCTTCAG	ACRV1	336	414	456	235	545	319	54
CTTCTACAACGAGCTTCGCG	ACTA1_CTTCTACAACGAGCTTCGCG	ACTA1	138	129	325	61	321	627	34
GGGTCAGAAAGATTCCTACG	ACTA1_GGGTCAGAAAGATTCCTACG	ACTA1	86	251	108	223	113	235	13
GGTGAAAGCCGGCTTCGCCG	ACTA1_GGTGAAAGCCGGCTTCGCCG	ACTA1	281	26	20	27	63	16	0
TCAGGTAGTCGGTGAGATCG	ACTA1_TCAGGTAGTCGGTGAGATCG	ACTA1	236	558	430	342	355	1498	820
CATGTATGTGGCTATCCAGG	ACTA2_CATGTATGTGGCTATCCAGG	ACTA2	571	267	456	182	364	32	259
GAAGCTCATTGTAGAAAGAG	ACTA2_GAAGCTCATTGTAGAAAGAG	ACTA2	423	409	343	162	387	1099	674
GACGTCCCAGACATCAGGTG	ACTA2_GACGTCCCAGACATCAGGTG	ACTA2	574	312	311	298	212	239	48
GGCCTCACCAGTAGTAACGA	ACTA2_GGCCTCACCAGTAGTAACGA	ACTA2	148	232	336	248	269	1605	13
AAGAGCTACGAGCTGCCTGA	ACTB_AAGAGCTACGAGCTGCCTGA	ACTB	620	154	366	261	288	128	377
CGTACAGGGATAGCACAGCC	ACTB_CGTACAGGGATAGCACAGCC	ACTB	5	362	321	269	245	401	196
GGATTCCTATGTGGGCGACG	ACTB_GGATTCCTATGTGGGCGACG	ACTB	519	100	79	118	256	4	63
TCACCTGGGTCATCTTCTCG	ACTB_TCACCTGGGTCATCTTCTCG	ACTB	969	912	1030	798	891	3454	3531
CGATGGACGGGAAGACAGCG	ACTC1_CGATGGACGGGAAGACAGCG	ACTC1	487	615	940	802	790	651	267
CTGGGCTTCATCACCTACGT	ACTC1_CTGGGCTTCATCACCTACGT	ACTC1	171	398	479	368	367	117	353
GGTACGGCCAGAAGCATACA	ACTC1_GGTACGGCCAGAAGCATACA	ACTC1	386	792	927	524	749	386	827
TCTTCATGAGGTAGTCAGTG	ACTC1_TCTTCATGAGGTAGTCAGTG	ACTC1	346	683	458	407	454	536	357
AGCTGTAGCCTCGCTCAGTG	ACTG1_AGCTGTAGCCTCGCTCAGTG	ACTG1	1343	889	976	759	914	868	1465
ATGGAAGGAAACACGGCTCG	ACTG1_ATGGAAGGAAACACGGCTCG	ACTG1	164	348	191	334	264	112	82
CAACAGAGAGAAGATGACTC	ACTG1_CAACAGAGAGAAGATGACTC	ACTG1	61	208	155	322	246	95	410
CTTCTACAACGAGCTGCGCG	ACTG1_CTTCTACAACGAGCTGCGCG	ACTG1	346	159	159	43	128	28	170
AGAGCTATGAGCTGCCAGAT	ACTG2_AGAGCTATGAGCTGCCAGAT	ACTG2	215	1236	840	1056	1020	867	398
CTGGATACCTGTGGTCACAA	ACTG2_CTGGATACCTGTGGTCACAA	ACTG2	484	1171	1234	462	1036	1320	971
TGAATCCAGGACGATGCCTG	ACTG2_TGAATCCAGGACGATGCCTG	ACTG2	962	1368	1064	1230	1153	520	1532
TGATGATGCCGTGTTCAATG	ACTG2_TGATGATGCCGTGTTCAATG	ACTG2	777	833	1251	1005	1018	774	2466
ACAGATCGAGAACATTGATG	ACTN4_ACAGATCGAGAACATTGATG	ACTN4	85	341	699	298	501	467	76
ACTCCCACAATGTCAACACC	ACTN4_ACTCCCACAATGTCAACACC	ACTN4	278	829	1020	747	921	1720	1699
GTTCATCGTCCATACCATCG	ACTN4_GTTCATCGTCCATACCATCG	ACTN4	0	393	269	266	263	350	91
TGGGCGGCTTGTGCACACGC	ACTN4_TGGGCGGCTTGTGCACACGC	ACTN4	207	677	485	642	540	1061	652
ACCACCATACCAATAGCTGT	ACTL6A_ACCACCATACCAATAGCTGT	ACTL6A	904	159	132	227	329	6	17
ACTGCAATTCCAGTCCACGA	ACTL6A_ACTGCAATTCCAGTCCACGA	ACTL6A	809	6	26	72	97	6	176
AGAAGTTGCCTCAGGTTACG	ACTL6A_AGAAGTTGCCTCAGGTTACG	ACTL6A	664	255	284	588	467	243	12
TGTTCCGAGGGAGAATATGG	ACTL6A_TGTTCCGAGGGAGAATATGG	ACTL6A	375	109	31	173	62	0	1
CAGGACATCAACAATGCCTG	ACTN1_CAGGACATCAACAATGCCTG	ACTN1	106	267	247	184	232	137	260
GCAGGGCCTTGATCTCCGAG	ACTN1_GCAGGGCCTTGATCTCCGAG	ACTN1	1293	654	848	637	737	950	1016
GGATCCGCCGCACAATCCCG	ACTN1_GGATCCGCCGCACAATCCCG	ACTN1	87	32	79	56	247	90	95
GGCCCTAACTCAGAAGCGAA	ACTN1_GGCCCTAACTCAGAAGCGAA	ACTN1	996	345	423	644	537	116	47
AGGACTTCCGGGATTACCGC	ACTN2_AGGACTTCCGGGATTACCGC	ACTN2	246	300	204	252	316	367	59
CCAGGTTAATATTTCCTATG	ACTN2_CCAGGTTAATATTTCCTATG	ACTN2	174	46	189	132	147	74	192
CGAGTCGGCGTCGCTGACAG	ACTN2_CGAGTCGGCGTCGCTGACAG	ACTN2	451	469	297	358	465	327	14
TGATGGTCCAGATCATACCC	ACTN2_TGATGGTCCAGATCATACCC	ACTN2	633	753	725	739	797	1656	443
CAGTGAGCTGGACTACCACG	ACTN3_CAGTGAGCTGGACTACCACG	ACTN3	185	740	1186	627	977	284	1939
CCATGGCTGGAGAACCGTGT	ACTN3_CCATGGCTGGAGAACCGTGT	ACTN3	325	94	241	59	209	2	232
GTCCAGGGCCTTGTTAACGT	ACTN3_GTCCAGGGCCTTGTTAACGT	ACTN3	167	324	353	305	355	513	32
TGCAACTGGAGTTTGCCCGG	ACTN3_TGCAACTGGAGTTTGCCCGG	ACTN3	115	64	85	159	104	21	167
ATTACACTGTTGGAGTGTGT	ACVR1_ATTACACTGTTGGAGTGTGT	ACVR1	337	1023	1049	666	610	727	160
CCATGACTTCTCATCACGGG	ACVR1_CCATGACTTCTCATCACGGG	ACVR1	393	866	818	749	754	538	521
CTGGTGTAACAGGAACATCA	ACVR1_CTGGTGTAACAGGAACATCA	ACVR1	519	733	721	665	585	428	785
GCCATCGTTGATGCTCAGTG	ACVR1_GCCATCGTTGATGCTCAGTG	ACVR1	275	590	362	600	441	1070	1109
AAGAGATTATTGGCAAGGGT	ACVR1B_AAGAGATTATTGGCAAGGGT	ACVR1B	76	72	240	67	211	0	126
ACTTGACTCAGGTCACCTCA	ACVR1B_ACTTGACTCAGGTCACCTCA	ACVR1B	510	533	440	372	482	338	545
CCGGTTCAGATAATCAAACA	ACVR1B_CCGGTTCAGATAATCAAACA	ACVR1B	230	269	612	318	619	509	583
CTACACGTGTGAGACAGATG	ACVR1B_CTACACGTGTGAGACAGATG	ACVR1B	0	71	120	104	125	98	186
AGTGGTTTCAAACCTAGTAA	ACVR2A_AGTGGTTTCAAACCTAGTAA	ACVR2A	449	424	329	289	570	533	172
ATTGCAGAAACCATGGCTAG	ACVR2A_ATTGCAGAAACCATGGCTAG	ACVR2A	528	321	524	323	489	331	1155
CCAAAGATCCACATCAACAC	ACVR2A_CCAAAGATCCACATCAACAC	ACVR2A	636	319	281	327	379	375	462
CCAGTTGCTTAACGAATATG	ACVR2A_CCAGTTGCTTAACGAATATG	ACVR2A	482	701	536	506	618	904	682
ACAAGCCGTCTATTGCCCAC	ACVR2B_ACAAGCCGTCTATTGCCCAC	ACVR2B	1020	753	529	560	356	1554	104
ATGACTTCAACTGCTACGAT	ACVR2B_ATGACTTCAACTGCTACGAT	ACVR2B	418	678	550	740	404	375	308
ATGTCCACATGACCGTAGGG	ACVR2B_ATGTCCACATGACCGTAGGG	ACVR2B	157	113	380	148	400	9	142
CTGGAGCGCACCAACCAGAG	ACVR2B_CTGGAGCGCACCAACCAGAG	ACVR2B	310	299	244	297	282	526	162
AGGCACCCCCAGGAACATCG	ACVRL1_AGGCACCCCCAGGAACATCG	ACVRL1	447	359	704	226	366	343	1645
CCAGGACTGTTCATCCCTCG	ACVRL1_CCAGGACTGTTCATCCCTCG	ACVRL1	248	600	520	465	526	900	753
CTGCGTGCTCGAGTTGCGGG	ACVRL1_CTGCGTGCTCGAGTTGCGGG	ACVRL1	562	352	572	404	346	908	192
TGGACAGTGACTGCACCACA	ACVRL1_TGGACAGTGACTGCACCACA	ACVRL1	77	190	321	257	141	147	36
AGGCACAAAGGTCATGTGGA	ACY1_AGGCACAAAGGTCATGTGGA	ACY1	663	884	830	806	692	618	763
CCATGCCTCACGCTTCATGG	ACY1_CCATGCCTCACGCTTCATGG	ACY1	252	562	506	436	280	950	95
GCTGGACAGTGCGGATACGC	ACY1_GCTGGACAGTGCGGATACGC	ACY1	438	543	446	378	343	36	329
TAGCTTAGTCAGGTTCACGG	ACY1_TAGCTTAGTCAGGTTCACGG	ACY1	561	625	350	486	411	440	494
ACAGTGCAAGGACAATTGCA	ACYP1_ACAGTGCAAGGACAATTGCA	ACYP1	760	699	666	1063	595	793	547
TAGGCTGAGGGTAAAAAGCT	ACYP1_TAGGCTGAGGGTAAAAAGCT	ACYP1	62	362	371	203	264	24	884
TGGGTCCAGAACACTGACCG	ACYP1_TGGGTCCAGAACACTGACCG	ACYP1	147	593	524	327	388	338	564
TTCCTGCATATGACGCACCT	ACYP1_TTCCTGCATATGACGCACCT	ACYP1	635	441	642	443	259	4218	384
ACCAGCAAAGGCACCGTGAC	ACYP2_ACCAGCAAAGGCACCGTGAC	ACYP2	168	549	263	353	353	144	240
CGCCCAGTCACTCAAATCCG	ACYP2_CGCCCAGTCACTCAAATCCG	ACYP2	200	503	468	365	430	933	93
GAGGTGTTCGGAAGAGTGCA	ACYP2_GAGGTGTTCGGAAGAGTGCA	ACYP2	625	492	986	425	813	886	15594
TGAAGCTAGGAAAATAGGAG	ACYP2_TGAAGCTAGGAAAATAGGAG	ACYP2	434	430	599	450	575	1079	209
CACAGACTGGTCCCCCAAGG	ADA_CACAGACTGGTCCCCCAAGG	ADA	142	423	319	633	282	74	100
TCACCGTACTGTCCACGCCG	ADA_TCACCGTACTGTCCACGCCG	ADA	651	876	1158	1174	1237	501	963
TCCCAGCTAACACAGCAGAG	ADA_TCCCAGCTAACACAGCAGAG	ADA	0	145	395	149	261	39	66
TGGACATACTCAAGACAGAG	ADA_TGGACATACTCAAGACAGAG	ADA	660	327	168	359	309	267	50
AGTCCGGGTACCCCTCTACG	ADAM8_AGTCCGGGTACCCCTCTACG	ADAM8	847	1223	1332	901	1196	585	1394
CAAACAGGTTCCCACACACG	ADAM8_CAAACAGGTTCCCACACACG	ADAM8	390	465	309	423	504	30	290
CCACATACAGCTCCACGTAG	ADAM8_CCACATACAGCTCCACGTAG	ADAM8	170	376	216	276	270	14	54
CCAGCTTAGACTCACCAAGT	ADAM8_CCAGCTTAGACTCACCAAGT	ADAM8	268	155	101	146	206	148	594
CCCATAAATACGGTCCTCAG	ADAM10_CCCATAAATACGGTCCTCAG	ADAM10	136	228	219	262	277	98	11
GGAAATGGAATGGTAGAACA	ADAM10_GGAAATGGAATGGTAGAACA	ADAM10	284	317	283	344	386	102	149
TTCCATCAATAACAGACCCA	ADAM10_TTCCATCAATAACAGACCCA	ADAM10	182	366	469	143	392	391	143
TTTCAACCTACGAATGAAGA	ADAM10_TTTCAACCTACGAATGAAGA	ADAM10	161	166	285	162	111	20	198
AGGCAATCAACACCTCTCTG	ADAR_AGGCAATCAACACCTCTCTG	ADAR	578	337	479	621	440	80	215
CGTTCTCCCCAATCAAGACA	ADAR_CGTTCTCCCCAATCAAGACA	ADAR	333	279	259	268	207	96	149
GTGCATACACTCAAGCAGTG	ADAR_GTGCATACACTCAAGCAGTG	ADAR	573	371	438	346	284	475	306
TTCTTGTAGGGTGAACACCG	ADAR_TTCTTGTAGGGTGAACACCG	ADAR	388	212	356	168	448	177	110
GGTGAATACATGAGTGATCG	ADARB1_GGTGAATACATGAGTGATCG	ADARB1	430	294	246	292	386	109	641
TCAGGTCACCAAACTTACCC	ADARB1_TCAGGTCACCAAACTTACCC	ADARB1	336	521	544	517	447	342	1393
TTCAGAAATCAGAGCGAGGG	ADARB1_TTCAGAAATCAGAGCGAGGG	ADARB1	710	958	969	1126	932	241	1124
TTGGAGCCCACGTAAAAGGG	ADARB1_TTGGAGCCCACGTAAAAGGG	ADARB1	682	744	916	635	1083	636	826
CAGAGCGATCGATATTCGTG	ADARB2_CAGAGCGATCGATATTCGTG	ADARB2	315	742	709	739	620	330	616
GGCGTTGGGGAACTGCACGA	ADARB2_GGCGTTGGGGAACTGCACGA	ADARB2	248	725	776	525	739	388	699
GTGGACGGCAGGACGTTCGA	ADARB2_GTGGACGGCAGGACGTTCGA	ADARB2	878	877	711	798	1037	1843	383
TCCTGGCATCACAAACACGG	ADARB2_TCCTGGCATCACAAACACGG	ADARB2	698	523	784	624	797	543	115
AACCGGGTTACGGACATGAG	ADCY1_AACCGGGTTACGGACATGAG	ADCY1	419	556	724	791	699	448	664
CATGTTCAGATCCACCTCGG	ADCY1_CATGTTCAGATCCACCTCGG	ADCY1	507	614	795	672	590	355	109
CCCAGACGAAAGGACCACCA	ADCY1_CCCAGACGAAAGGACCACCA	ADCY1	981	1345	1547	1251	1001	1006	773
CGGGGTGGTGTAGACAACGT	ADCY1_CGGGGTGGTGTAGACAACGT	ADCY1	496	720	514	647	430	681	611
ACTCCAAGTACCGGGTCATG	ADCY2_ACTCCAAGTACCGGGTCATG	ADCY2	517	414	730	352	896	575	1380
CAGGCAGACGCTAAGCACGA	ADCY2_CAGGCAGACGCTAAGCACGA	ADCY2	119	1251	849	749	755	1128	204
CCTGTAATTGCATCAAGTCG	ADCY2_CCTGTAATTGCATCAAGTCG	ADCY2	1007	384	606	551	584	1214	356
TGAAGCGGCATACAAACGTG	ADCY2_TGAAGCGGCATACAAACGTG	ADCY2	428	242	187	298	213	253	125
AGCTGTCTCCAGTACTACAC	ADCY3_AGCTGTCTCCAGTACTACAC	ADCY3	848	712	1032	1002	1113	222	526
CCACGGAGATGATCACGATG	ADCY3_CCACGGAGATGATCACGATG	ADCY3	1156	970	645	448	451	1744	252
GTCGATGAGTATCTCGACCA	ADCY3_GTCGATGAGTATCTCGACCA	ADCY3	134	281	346	316	245	1510	70
TCTCTTCTAGGTAATCACAG	ADCY3_TCTCTTCTAGGTAATCACAG	ADCY3	0	0	0	0	0	0	0
AGCCGCTCCAGTTTGTCCGA	ADCY5_AGCCGCTCCAGTTTGTCCGA	ADCY5	692	378	244	259	315	56	151
AGCTACACTCACCTTTACGC	ADCY5_AGCTACACTCACCTTTACGC	ADCY5	639	209	369	353	428	163	390
CACAGCGGGCGAGTACACTG	ADCY5_CACAGCGGGCGAGTACACTG	ADCY5	742	404	855	335	795	418	3774
GACGACGATCCTCCGCTGAG	ADCY5_GACGACGATCCTCCGCTGAG	ADCY5	1060	398	447	336	436	137	500
AACACTGCAGTACCTGAACG	ADCY6_AACACTGCAGTACCTGAACG	ADCY6	962	1249	1429	1027	1215	897	834
ATAGATCCCAAGCATCAGGG	ADCY6_ATAGATCCCAAGCATCAGGG	ADCY6	607	416	899	568	567	540	1246
GATGACGCCTTCATCCGGAG	ADCY6_GATGACGCCTTCATCCGGAG	ADCY6	99	261	97	300	123	580	132
TTGGCCTGGCAACTTAACCG	ADCY6_TTGGCCTGGCAACTTAACCG	ADCY6	234	341	348	418	321	124	256
AGAGGCACCAGAATGTCAGG	ADCY7_AGAGGCACCAGAATGTCAGG	ADCY7	477	781	811	778	431	233	981
CCGTAGCCGGGTGCACATCA	ADCY7_CCGTAGCCGGGTGCACATCA	ADCY7	339	281	230	139	319	103	229
GCGTGGGTAGGCAGCGACAC	ADCY7_GCGTGGGTAGGCAGCGACAC	ADCY7	71	154	152	99	114	177	50
TGTACGTCGAGTGTCTCCTG	ADCY7_TGTACGTCGAGTGTCTCCTG	ADCY7	475	707	536	585	596	619	660
ATTTCCAGGACAACAAACCG	ADCY8_ATTTCCAGGACAACAAACCG	ADCY8	305	527	657	550	609	230	572
CAAAACACGATGTTGACATG	ADCY8_CAAAACACGATGTTGACATG	ADCY8	641	616	584	366	665	1454	295
CGATATTTAAGATGGCACCC	ADCY8_CGATATTTAAGATGGCACCC	ADCY8	432	297	389	324	358	53	250
GCTGCAGGTCATCCTCCAAG	ADCY8_GCTGCAGGTCATCCTCCAAG	ADCY8	723	483	429	431	353	434	148
GATATCGGGTCAGAGAGCCA	ADCY9_GATATCGGGTCAGAGAGCCA	ADCY9	633	342	752	339	573	262	222
GCTACCACGTCACTGCATCG	ADCY9_GCTACCACGTCACTGCATCG	ADCY9	196	732	996	512	790	254	474
GGGAGACTGTTACTACTGCG	ADCY9_GGGAGACTGTTACTACTGCG	ADCY9	607	753	899	833	769	2706	452
TGTACGCCCGGCATTACGCG	ADCY9_TGTACGCCCGGCATTACGCG	ADCY9	749	804	658	515	578	1296	444
AGAGGAAGAGGCGTACGGCG	ADCYAP1_AGAGGAAGAGGCGTACGGCG	ADCYAP1	190	219	414	97	269	28	174
GAAGCACCTGCAGTCGCTCG	ADCYAP1_GAAGCACCTGCAGTCGCTCG	ADCYAP1	610	214	301	351	280	124	119
GCTGCCAGACTTCGATGGCT	ADCYAP1_GCTGCCAGACTTCGATGGCT	ADCYAP1	302	353	388	270	292	94	140
GGCCTCGTTAAGGATCCCGT	ADCYAP1_GGCCTCGTTAAGGATCCCGT	ADCYAP1	249	467	270	292	121	19	495
CGAATCTTCAACCCAGACCA	ADCYAP1R1_CGAATCTTCAACCCAGACCA	ADCYAP1R1	342	410	416	256	473	190	275
GGTGAGCCGGAACTGCACGG	ADCYAP1R1_GGTGAGCCGGAACTGCACGG	ADCYAP1R1	353	479	507	650	397	366	94
TGAATATGAATCTGAGACTG	ADCYAP1R1_TGAATATGAATCTGAGACTG	ADCYAP1R1	299	219	544	277	416	477	87
TGTGGGACAACATCACGTGT	ADCYAP1R1_TGTGGGACAACATCACGTGT	ADCYAP1R1	229	420	463	488	318	64	91
ATTATCGAGCATCCGCATGA	ADD1_ATTATCGAGCATCCGCATGA	ADD1	1181	1408	2022	1399	1532	1349	3675
CCTCTTGCCAATCTCCCCGG	ADD1_CCTCTTGCCAATCTCCCCGG	ADD1	1149	1192	1110	1051	1058	843	1199
GACTAGCAGATCTCTTTGGG	ADD1_GACTAGCAGATCTCTTTGGG	ADD1	498	338	603	407	407	288	203
GTAATGCCAATAGGCCTGTG	ADD1_GTAATGCCAATAGGCCTGTG	ADD1	1164	1789	1526	1284	1374	2327	1008
ACTCGGCCATCTATGCAGCG	ADD2_ACTCGGCCATCTATGCAGCG	ADD2	978	715	750	535	590	199	357
GCTGAGTGACACCTATGTCA	ADD2_GCTGAGTGACACCTATGTCA	ADD2	337	273	508	288	524	448	217
GGAGAAGCACCGGCCCCATG	ADD2_GGAGAAGCACCGGCCCCATG	ADD2	884	983	749	936	714	482	258
GGTGCTAAGAAACCATGGAG	ADD2_GGTGCTAAGAAACCATGGAG	ADD2	585	278	251	341	247	183	58
AAGGATCCCACATTTCATGG	ADD3_AAGGATCCCACATTTCATGG	ADD3	505	528	366	425	436	217	216
ACCCAGAATACATTAGGGAG	ADD3_ACCCAGAATACATTAGGGAG	ADD3	211	211	425	157	321	124	202
CTAGGCTTCTCTCGAATGAG	ADD3_CTAGGCTTCTCTCGAATGAG	ADD3	507	476	688	423	666	209	308
GTCTACAAGTCTGTACAGGC	ADD3_GTCTACAAGTCTGTACAGGC	ADD3	59	343	308	365	337	205	146
CCAATACCTATGCCTGTAAG	PLIN2_CCAATACCTATGCCTGTAAG	PLIN2	243	380	656	365	618	2135	110
CTCAGCCTATCTCAGTACAA	PLIN2_CTCAGCCTATCTCAGTACAA	PLIN2	819	832	416	637	377	1866	268
GCAGCATTAACACAGTCTTG	PLIN2_GCAGCATTAACACAGTCTTG	PLIN2	264	979	602	816	318	392	154
GGATAAGCTCTACCTCTCAT	PLIN2_GGATAAGCTCTACCTCTCAT	PLIN2	307	785	486	679	398	876	319
ACAGACTTTCTCTAGAGGCG	ADH1A_ACAGACTTTCTCTAGAGGCG	ADH1A	106	140	210	188	160	14	14
CACACTGAGGAATAGCGAGT	ADH1A_CACACTGAGGAATAGCGAGT	ADH1A	367	648	829	457	510	618	859
CCAGTGTAAGCAATCCTCAG	ADH1A_CCAGTGTAAGCAATCCTCAG	ADH1A	91	456	397	391	391	317	64
CCATGGTACCACTAACCACG	ADH1A_CCATGGTACCACTAACCACG	ADH1A	328	326	521	170	285	66	263
CACCTTCTCCCAGTACACGG	ADH1B_CACCTTCTCCCAGTACACGG	ADH1B	154	242	392	300	411	207	190
CTGTCACACAGATGACCACG	ADH1B_CTGTCACACAGATGACCACG	ADH1B	599	415	449	429	192	154	92
GTCTGCAGTTAACGTTGCCA	ADH1B_GTCTGCAGTTAACGTTGCCA	ADH1B	701	348	544	400	405	239	311
TGGAGCAGCCAGAATCATTG	ADH1B_TGGAGCAGCCAGAATCATTG	ADH1B	492	555	583	394	589	420	876
AGCAGCCAGAATCATTGCTG	ADH1C_AGCAGCCAGAATCATTGCTG	ADH1C	471	714	838	767	879	402	480
CACCTTCTCCCAGTACACAG	ADH1C_CACCTTCTCCCAGTACACAG	ADH1C	187	581	423	448	523	153	212
GGTAGAGGTTGCACCTCCTA	ADH1C_GGTAGAGGTTGCACCTCCTA	ADH1C	343	332	445	300	369	336	122
TGAAAACATAGGTCACCCCA	ADH1C_TGAAAACATAGGTCACCCCA	ADH1C	401	603	457	605	414	2468	581
AAATTTAGAATCGATAACAG	ADH4_AAATTTAGAATCGATAACAG	ADH4	267	309	373	455	430	82	38
TACATTCTCTCAGTACACTG	ADH4_TACATTCTCTCAGTACACTG	ADH4	178	137	310	247	299	156	396
TCAACCTCTTCAATGCAAAG	ADH4_TCAACCTCTTCAATGCAAAG	ADH4	225	207	469	268	414	241	833
TTCCCACACAAATTTGTGAG	ADH4_TTCCCACACAAATTTGTGAG	ADH4	88	256	339	203	219	165	396
GCTGGAATTGTGGAAAGTGT	ADH5_GCTGGAATTGTGGAAAGTGT	ADH5	395	423	465	348	535	152	297
TCAGGGTATAGGCATCGGTG	ADH5_TCAGGGTATAGGCATCGGTG	ADH5	192	100	144	135	130	569	7
TGCTTCCCGGATCATTGGTG	ADH5_TGCTTCCCGGATCATTGGTG	ADH5	291	226	488	320	458	26	238
TGGGTTTACTAAAATCCTGA	ADH5_TGGGTTTACTAAAATCCTGA	ADH5	224	250	135	275	174	76	609
AAAACCCAACTGATGTCTGA	ADH6_AAAACCCAACTGATGTCTGA	ADH6	1315	1630	1232	1560	1312	808	779
CCTTCATGGCCCAAGATGGT	ADH6_CCTTCATGGCCCAAGATGGT	ADH6	1103	1332	1155	1355	986	1661	356
TAAGCACAGTGAAACCAGGT	ADH6_TAAGCACAGTGAAACCAGGT	ADH6	955	1167	1019	1012	779	1074	589
TGCTGCAATCAATACTGCCA	ADH6_TGCTGCAATCAATACTGCCA	ADH6	1114	755	893	716	864	267	471
AAGACGACGCAAGTGGAACC	ADH7_AAGACGACGCAAGTGGAACC	ADH7	335	775	806	618	706	1311	983
CCTACTCGCTCCTAATGCAA	ADH7_CCTACTCGCTCCTAATGCAA	ADH7	475	172	349	185	423	73	167
CTTGGGACTGATACACTCAG	ADH7_CTTGGGACTGATACACTCAG	ADH7	227	321	440	197	344	302	120
TACATTTACCGAGTACACAG	ADH7_TACATTTACCGAGTACACAG	ADH7	282	243	330	276	277	124	599
AAAGTCGAATATCATGCTGG	ADK_AAAGTCGAATATCATGCTGG	ADK	814	711	921	899	1073	428	282
ACAGCAGAGATGTCAAGCAG	ADK_ACAGCAGAGATGTCAAGCAG	ADK	807	830	720	1009	745	346	710
GTAGTAATGAGCATCCACAT	ADK_GTAGTAATGAGCATCCACAT	ADK	504	448	547	345	713	80	211
TCTGGAGAAAAACTGGATGT	ADK_TCTGGAGAAAAACTGGATGT	ADK	623	359	436	258	416	115	131
CGACGCGACATCCAACCGAG	ADM_CGACGCGACATCCAACCGAG	ADM	130	308	695	212	603	55	195
CTAGGAAGGCGAGCGAACCC	ADM_CTAGGAAGGCGAGCGAACCC	ADM	25	431	465	383	470	275	423
GCACCGTGCACGTCCCGAAG	ADM_GCACCGTGCACGTCCCGAAG	ADM	373	646	623	428	539	288	173
TCTGGCGGTAGCGCTTGACT	ADM_TCTGGCGGTAGCGCTTGACT	ADM	245	287	412	187	248	84	27
AGGGGTCAGTCCCACCACGA	ADORA1_AGGGGTCAGTCCCACCACGA	ADORA1	734	343	453	213	272	311	159
GAGGACCATGAGGAGAAGCG	ADORA1_GAGGACCATGAGGAGAAGCG	ADORA1	218	241	229	289	262	194	166
GGAGAGGGATCTTGACCCGG	ADORA1_GGAGAGGGATCTTGACCCGG	ADORA1	395	346	390	458	429	55	264
GGCAGCCAACGGCAGCATGG	ADORA1_GGCAGCCAACGGCAGCATGG	ADORA1	619	571	650	470	772	2127	996
AAGCAGTTGATGATGTGTAG	ADORA2A_AAGCAGTTGATGATGTGTAG	ADORA2A	849	454	818	534	788	735	440
ATGCTAGGTTGGAACAACTG	ADORA2A_ATGCTAGGTTGGAACAACTG	ADORA2A	409	293	379	397	248	705	439
GCGGCGGCCGACATCGCAGT	ADORA2A_GCGGCGGCCGACATCGCAGT	ADORA2A	132	274	492	435	337	530	1425
TGGCTTGGTGACCGGCACGA	ADORA2A_TGGCTTGGTGACCGGCACGA	ADORA2A	222	361	474	283	316	22	714
CACCAGCATTATAAGCAGTG	ADORA2B_CACCAGCATTATAAGCAGTG	ADORA2B	1306	1140	981	1034	896	6093	284
GGTATAAAAGTTTGGTCACG	ADORA2B_GGTATAAAAGTTTGGTCACG	ADORA2B	126	176	332	286	262	316	234
TCTCAAAGAGACACTTCACA	ADORA2B_TCTCAAAGAGACACTTCACA	ADORA2B	0	0	0	0	0	0	0
TGGAGTCAATCCGATGCCAA	ADORA2B_TGGAGTCAATCCGATGCCAA	ADORA2B	1037	665	747	623	854	203	2263
ATGGCGCACATGACAACCAG	ADORA3_ATGGCGCACATGACAACCAG	ADORA3	1060	1027	1378	887	872	1061	427
ATTGGACTCTGCGCCATAGT	ADORA3_ATTGGACTCTGCGCCATAGT	ADORA3	249	910	338	485	338	179	31
GACATTTCTGTGGTACTCTG	ADORA3_GACATTTCTGTGGTACTCTG	ADORA3	394	322	487	425	521	539	97
GATGCCCAGGCTGACAACAA	ADORA3_GATGCCCAGGCTGACAACAA	ADORA3	395	961	950	658	737	848	430
AAGTGAGCATCGAGAGTGGT	ADPRH_AAGTGAGCATCGAGAGTGGT	ADPRH	759	789	957	670	944	792	426
AGTCTTGGTAATGCTTAGCA	ADPRH_AGTCTTGGTAATGCTTAGCA	ADPRH	301	396	753	308	859	440	424
ATAGCAGACCACCCTTGCAG	ADPRH_ATAGCAGACCACCCTTGCAG	ADPRH	260	713	602	249	425	974	1017
GGAGAAGATACACCGGCAGT	ADPRH_GGAGAAGATACACCGGCAGT	ADPRH	290	282	595	308	447	43	75
AGCTAGGCATGATTGACCGC	PARP1_AGCTAGGCATGATTGACCGC	PARP1	571	407	710	318	525	114	628
CGATGCCTATTACTGCACTG	PARP1_CGATGCCTATTACTGCACTG	PARP1	1471	866	1015	688	1205	213	744
GGCCATGATTGAGAAACTCG	PARP1_GGCCATGATTGAGAAACTCG	PARP1	36	2	28	7	31	0	0
TACCGATCACCGTACCCACA	PARP1_TACCGATCACCGTACCCACA	PARP1	862	597	986	488	938	460	1019
CACACCAACTTACATCGTTG	PARP4_CACACCAACTTACATCGTTG	PARP4	1492	1121	1336	1186	1086	387	756
CTGTTGCCAGGGTGCTACGG	PARP4_CTGTTGCCAGGGTGCTACGG	PARP4	284	476	535	316	433	1266	64
GAGTCGATCATTGAGAAACA	PARP4_GAGTCGATCATTGAGAAACA	PARP4	895	785	1106	858	1125	396	1407
TCTCCTGTACAAAACATCGT	PARP4_TCTCCTGTACAAAACATCGT	PARP4	0	0	2	0	0	0	0
ATCTCCGTGGACCGGTACGT	ADRA1D_ATCTCCGTGGACCGGTACGT	ADRA1D	343	216	359	217	339	104	151
CGGCGACGTGAATGGCACGG	ADRA1D_CGGCGACGTGAATGGCACGG	ADRA1D	320	436	273	329	247	592	139
TACCGCAGAAGCGCTCGTCA	ADRA1D_TACCGCAGAAGCGCTCGTCA	ADRA1D	19	217	188	327	133	20	361
TGCGCGCGACCACGTACACG	ADRA1D_TGCGCGCGACCACGTACACG	ADRA1D	147	168	87	57	224	7	25
CATCCTAGTCATCTTGTCTG	ADRA1B_CATCCTAGTCATCTTGTCTG	ADRA1B	141	425	610	467	484	225	5747
CCATTCCAAGAACTTTCACG	ADRA1B_CCATTCCAAGAACTTTCACG	ADRA1B	98	210	210	253	192	45	108
CTCCATCGATCGCTACATCG	ADRA1B_CTCCATCGATCGCTACATCG	ADRA1B	308	740	1108	675	623	634	297
TCTTGGCCACTATATAGACA	ADRA1B_TCTTGGCCACTATATAGACA	ADRA1B	312	115	249	129	493	15	53
ATCTCCATCGACCGCTACAT	ADRA1A_ATCTCCATCGACCGCTACAT	ADRA1A	444	602	491	521	344	767	203
CCAAGACGCACTTCTCAGTG	ADRA1A_CCAAGACGCACTTCTCAGTG	ADRA1A	1678	1198	1600	1100	1562	544	1288
GGGTCCAATGGATATGACCA	ADRA1A_GGGTCCAATGGATATGACCA	ADRA1A	140	277	387	391	380	66	56
TGGCCTCAAGACCGACAAGT	ADRA1A_TGGCCTCAAGACCGACAAGT	ADRA1A	970	1007	1463	888	1186	1458	1278
ATGATGGCCTTGATGCGGCG	ADRA2A_ATGATGGCCTTGATGCGGCG	ADRA2A	782	772	946	589	962	737	685
GACGAGCACGTTGCCGAACA	ADRA2A_GACGAGCACGTTGCCGAACA	ADRA2A	978	967	892	860	805	395	1382
TCCAGCGCGTCGGTGTCGCG	ADRA2A_TCCAGCGCGTCGGTGTCGCG	ADRA2A	458	379	511	198	456	81	74
TGGTCGTTGATCTCGCAGCG	ADRA2A_TGGTCGTTGATCTCGCAGCG	ADRA2A	622	495	619	659	637	152	422
CAGCCCCGACCCGACCATGG	ADRA2B_CAGCCCCGACCCGACCATGG	ADRA2B	1089	726	1040	606	920	347	1340
CGGACACTCGAAGTCCACTG	ADRA2B_CGGACACTCGAAGTCCACTG	ADRA2B	872	989	889	987	575	2258	583
TGGAGTTGTACTCCAGCGCG	ADRA2B_TGGAGTTGTACTCCAGCGCG	ADRA2B	598	778	871	993	713	788	296
TGGTCGCCCTTGTAGATGAG	ADRA2B_TGGTCGCCCTTGTAGATGAG	ADRA2B	1089	1105	1294	862	931	1652	1685
ACACAGATGCACGATCGACG	ADRA2C_ACACAGATGCACGATCGACG	ADRA2C	367	331	647	402	573	602	207
ATGGTGGCCTTGACGCGGCG	ADRA2C_ATGGTGGCCTTGACGCGGCG	ADRA2C	64	117	182	226	108	393	125
CTACGCGCGCATCTACCGAG	ADRA2C_CTACGCGCGCATCTACCGAG	ADRA2C	345	290	315	202	310	553	34
TGTACCAGGTCTCGTCGTTG	ADRA2C_TGTACCAGGTCTCGTCGTTG	ADRA2C	502	600	684	462	562	699	941
CGCACGCCCGTTGGCCAGCG	ADRB1_CGCACGCCCGTTGGCCAGCG	ADRB1	85	168	397	62	158	41	2
GTAGAAGGAGACTACGGACG	ADRB1_GTAGAAGGAGACTACGGACG	ADRB1	211	84	70	163	90	0	3
TGGCCATCGCCAAGACGCCG	ADRB1_TGGCCATCGCCAAGACGCCG	ADRB1	275	687	635	320	576	273	157
TGGCCCACACGGTGCACACG	ADRB1_TGGCCCACACGGTGCACACG	ADRB1	208	412	288	419	130	218	8
ATCCACTGCGATCACGCACA	ADRB2_ATCCACTGCGATCACGCACA	ADRB2	1204	1033	1105	942	784	521	1737
CAGACGCTCGAACTTGGCAA	ADRB2_CAGACGCTCGAACTTGGCAA	ADRB2	186	418	334	405	203	138	463
CCCTTTCCTGCGTGACGTCG	ADRB2_CCCTTTCCTGCGTGACGTCG	ADRB2	1092	990	759	858	760	1446	806
GGGAACGTAGAAGGACACGA	ADRB2_GGGAACGTAGAAGGACACGA	ADRB2	272	1019	776	851	660	756	844
ACCAGTGCGCCGTAACGCAG	ADRB3_ACCAGTGCGCCGTAACGCAG	ADRB3	1012	770	887	502	904	1381	983
CAGCGAAGTCACGAACACGT	ADRB3_CAGCGAAGTCACGAACACGT	ADRB3	267	483	344	303	445	221	180
CCAATACCGCCAACACCAGT	ADRB3_CCAATACCGCCAACACCAGT	ADRB3	416	359	572	483	460	85	601
GATGGGCGCAAACGACACCG	ADRB3_GATGGGCGCAAACGACACCG	ADRB3	301	838	445	506	385	65	170
CATCGCATCATTGGGCGCGG	ADRBK1_CATCGCATCATTGGGCGCGG	ADRBK1	331	1016	965	697	746	3522	2275
CCAGGTCCGAGATCCGCACG	ADRBK1_CCAGGTCCGAGATCCGCACG	ADRBK1	440	312	214	285	255	206	169
CTCCTCATAGAATTCCACCA	ADRBK1_CTCCTCATAGAATTCCACCA	ADRBK1	614	639	880	576	529	254	393
TCTGGAACACGTCCCCTCGG	ADRBK1_TCTGGAACACGTCCCCTCGG	ADRBK1	737	601	845	580	786	140	494
ACTACTTACACACTCGCATG	ADRBK2_ACTACTTACACACTCGCATG	ADRBK2	458	647	616	528	500	3611	59
GATGAAGCAGAGTTTATCTG	ADRBK2_GATGAAGCAGAGTTTATCTG	ADRBK2	487	536	486	287	508	307	84
TATTGGACGAGGAGGATTCG	ADRBK2_TATTGGACGAGGAGGATTCG	ADRBK2	545	965	1517	856	1030	1175	586
TCTTCATAAAACTTCACCTG	ADRBK2_TCTTCATAAAACTTCACCTG	ADRBK2	625	616	635	582	663	453	239
AAATGTGTGAAACCTAATGT	ADSL_AAATGTGTGAAACCTAATGT	ADSL	174	336	245	305	313	618	70
CAGCAACGTTCTGAACGCAT	ADSL_CAGCAACGTTCTGAACGCAT	ADSL	433	530	179	325	223	325	31
GGTATAAATTCCGGACATGG	ADSL_GGTATAAATTCCGGACATGG	ADSL	558	185	178	359	319	112	84
TATTGAAGTACTGTCTGTGC	ADSL_TATTGAAGTACTGTCTGTGC	ADSL	405	246	249	310	278	68	232
AATTTGAAGAGGTTACAAAA	ADSS_AATTTGAAGAGGTTACAAAA	ADSS	182	196	293	345	489	48	166
CAGCTTTGGACGAATAAACT	ADSS_CAGCTTTGGACGAATAAACT	ADSS	363	133	105	138	117	17	85
TGACAGAGCTCATATTGGTA	ADSS_TGACAGAGCTCATATTGGTA	ADSS	403	191	276	276	272	289	160
TTTGGATTAATTATTCCACT	ADSS_TTTGGATTAATTATTCCACT	ADSS	122	134	70	259	94	55	8
ACTACTTCGTCCCAGCACCC	AP2A1_ACTACTTCGTCCCAGCACCC	AP2A1	519	984	1076	698	827	957	1775
AGGCCTTGTACAGTCGAAGG	AP2A1_AGGCCTTGTACAGTCGAAGG	AP2A1	791	1201	1042	1261	861	1535	1303
CGGAGCGGGACGTCAGCGTG	AP2A1_CGGAGCGGGACGTCAGCGTG	AP2A1	305	237	656	282	439	1276	457
TGGTGACGATCTGTAGCACA	AP2A1_TGGTGACGATCTGTAGCACA	AP2A1	156	505	365	323	377	1158	717
CATCTCGGCCACGATCTGTG	AP2A2_CATCTCGGCCACGATCTGTG	AP2A2	226	355	336	180	336	365	448
GCTGAGTTCAAACAGATACA	AP2A2_GCTGAGTTCAAACAGATACA	AP2A2	120	251	235	199	166	67	276
GGACGACGTGCAGGGCTACG	AP2A2_GGACGACGTGCAGGGCTACG	AP2A2	318	484	585	297	371	78	341
GGGCGACTGGACATCCCGAG	AP2A2_GGGCGACTGGACATCCCGAG	AP2A2	146	379	274	244	376	1104	97
CCTCGCCAACTATATGCCCA	AP1B1_CCTCGCCAACTATATGCCCA	AP1B1	80	330	439	220	372	677	184
CTAACAGTGTGGGCTCGATG	AP1B1_CTAACAGTGTGGGCTCGATG	AP1B1	196	281	436	183	308	66	58
CTTTAGAAAGAGTTTCACAA	AP1B1_CTTTAGAAAGAGTTTCACAA	AP1B1	126	110	197	113	138	19	122
TGGCGTAATTCATCAAGTAG	AP1B1_TGGCGTAATTCATCAAGTAG	AP1B1	394	464	377	475	263	660	207
ACTTGCCAATTCATCATGGG	AP2B1_ACTTGCCAATTCATCATGGG	AP2B1	721	505	724	337	827	663	1483
GAGTTGGCATGGGATAGCCG	AP2B1_GAGTTGGCATGGGATAGCCG	AP2B1	749	455	629	251	469	164	948
GGTGGTGGCTAATGCCGTAG	AP2B1_GGTGGTGGCTAATGCCGTAG	AP2B1	0	51	18	28	14	135	0
GTCTAAGTTCTCACACAGAG	AP2B1_GTCTAAGTTCTCACACAGAG	AP2B1	372	558	434	469	415	363	343
ATAGCACGCAATTCGTACAG	AP1G1_ATAGCACGCAATTCGTACAG	AP1G1	229	350	273	547	287	89	51
CATGCAGCCACTTGTACCAA	AP1G1_CATGCAGCCACTTGTACCAA	AP1G1	689	736	480	959	596	550	91
GGTATGCACCTTCCAAACGA	AP1G1_GGTATGCACCTTCCAAACGA	AP1G1	883	376	275	383	511	158	208
TGTTCAATAAGAAACGACCC	AP1G1_TGTTCAATAAGAAACGACCC	AP1G1	475	245	408	332	315	46	99
CCAGACCTTTCATGGGAACG	AEBP1_CCAGACCTTTCATGGGAACG	AEBP1	131	506	360	340	186	347	783
GCACCAGGCTGCGCACACGT	AEBP1_GCACCAGGCTGCGCACACGT	AEBP1	795	681	440	369	275	572	160
GCGCCGAATGTACTCAACTG	AEBP1_GCGCCGAATGTACTCAACTG	AEBP1	122	481	342	337	335	949	76
GTGTGACTCCATCCCAATGG	AEBP1_GTGTGACTCCATCCCAATGG	AEBP1	712	1062	1551	919	1255	711	1598
CAAGCTCGAATGTGACAAGT	AES_CAAGCTCGAATGTGACAAGT	AES	183	338	295	279	221	130	18
CCTGCCCTACCTCTCCCAAG	AES_CCTGCCCTACCTCTCCCAAG	AES	177	118	84	130	143	0	0
CGGATGATAGAGTTCAGCTC	AES_CGGATGATAGAGTTCAGCTC	AES	280	180	417	130	203	183	36
GTGGTGAATTTGAGTTGCTG	AES_GTGGTGAATTTGAGTTGCTG	AES	1266	1136	975	1358	1153	747	1039
AACTACTGACCACTACACTC	CRISP1_AACTACTGACCACTACACTC	CRISP1	1627	923	1183	850	1090	702	1714
GAGTCTACAAGTTTCAAACA	CRISP1_GAGTCTACAAGTTTCAAACA	CRISP1	326	420	426	502	403	723	97
TTAATATACACAACGCCCTC	CRISP1_TTAATATACACAACGCCCTC	CRISP1	132	365	124	160	271	70	0
TTGGAAGTCTCCTCTCAAGG	CRISP1_TTGGAAGTCTCCTCTCAAGG	CRISP1	329	364	520	377	435	92	299
AAAAAATATGTGCTATGGAG	AFM_AAAAAATATGTGCTATGGAG	AFM	326	278	369	482	429	304	107
AGAGAATATTCACCGTGTCA	AFM_AGAGAATATTCACCGTGTCA	AFM	601	602	837	744	775	753	755
AGTCAACTGCCTTCAAACAA	AFM_AGTCAACTGCCTTCAAACAA	AFM	161	336	363	273	294	751	103
TATAACAAGAAATCTGATGT	AFM_TATAACAAGAAATCTGATGT	AFM	229	259	480	288	329	87	1516
ACATTGACCACGTTCCAGCG	AFP_ACATTGACCACGTTCCAGCG	AFP	326	474	253	234	235	1113	69
AGTGGCTTCTTGAACAAACT	AFP_AGTGGCTTCTTGAACAAACT	AFP	323	201	123	106	106	204	36
AGTTGAATGCTTCCAAACAA	AFP_AGTTGAATGCTTCCAAACAA	AFP	231	347	296	390	316	282	67
ATTGTAGGTGCATACAGGAA	AFP_ATTGTAGGTGCATACAGGAA	AFP	262	523	414	255	335	260	185
ATGGTTGTAATCCATAAGAC	AGA_ATGGTTGTAATCCATAAGAC	AGA	452	270	203	245	152	292	592
CCAGATCCCTCAAAATACTG	AGA_CCAGATCCCTCAAAATACTG	AGA	412	804	730	750	737	862	143
GGGCCAAGTGTTGACGACCA	AGA_GGGCCAAGTGTTGACGACCA	AGA	661	716	1029	698	890	1363	336
TGGAGGGCATTAGCATCTGG	AGA_TGGAGGGCATTAGCATCTGG	AGA	30	228	441	277	172	755	426
CAGCGGTCACCTGCACGACG	ACAN_CAGCGGTCACCTGCACGACG	ACAN	485	731	561	444	490	295	164
CCTGCGCTCCAATGACTCTG	ACAN_CCTGCGCTCCAATGACTCTG	ACAN	518	125	496	205	258	714	60
GAACCAGCCTATACCCCAGT	ACAN_GAACCAGCCTATACCCCAGT	ACAN	437	434	223	375	204	410	503
GAGGGCAGTTCACCAACCGT	ACAN_GAGGGCAGTTCACCAACCGT	ACAN	391	133	330	178	410	0	73
CATCATAGGAGTATCTGTGA	AGER_CATCATAGGAGTATCTGTGA	AGER	663	525	631	308	499	68	899
GTCAGGGTTACGGTTCCACC	AGER_GTCAGGGTTACGGTTCCACC	AGER	438	1091	758	838	674	151	265
GTGCTCAAAACATCACAGCC	AGER_GTGCTCAAAACATCACAGCC	AGER	1313	1051	1040	760	774	1352	332
TGGAATTCTTACGGTAGACA	AGER_TGGAATTCTTACGGTAGACA	AGER	373	505	314	549	368	343	136
AAACACGAAACCTTATAGGA	AGL_AAACACGAAACCTTATAGGA	AGL	383	348	445	430	616	806	254
ACGCTATGGGAATAAACCAG	AGL_ACGCTATGGGAATAAACCAG	AGL	286	1120	818	913	965	323	532
ATGCGTAATATCCATAAACA	AGL_ATGCGTAATATCCATAAACA	AGL	440	294	358	254	329	127	620
TGAAGAGTAACACAGTCCAA	AGL_TGAAGAGTAACACAGTCCAA	AGL	218	607	566	452	274	661	287
ACGCAGCGACGTGAGGAGCG	AGRP_ACGCAGCGACGTGAGGAGCG	AGRP	445	416	483	455	290	15	410
AGAAGAGGATCTGTTGCAGG	AGRP_AGAAGAGGATCTGTTGCAGG	AGRP	376	313	484	462	584	184	122
CCTGCAGGTACTAGACCTGC	AGRP_CCTGCAGGTACTAGACCTGC	AGRP	541	861	893	847	942	685	231
GCCACGCGAGGAGCCCAGAT	AGRP_GCCACGCGAGGAGCCCAGAT	AGRP	588	583	647	510	500	136	508
AAGTGCAAGAGTCAGTCGGG	JAG1_AAGTGCAAGAGTCAGTCGGG	JAG1	1362	718	750	890	688	169	585
ATGGGCCCCGAATGTAACAG	JAG1_ATGGGCCCCGAATGTAACAG	JAG1	614	713	967	833	854	492	527
GATGAGGCCACGTGCAACAA	JAG1_GATGAGGCCACGTGCAACAA	JAG1	536	539	1142	689	738	296	3759
TCATCAGCCGTGTCTCAACG	JAG1_TCATCAGCCGTGTCTCAACG	JAG1	655	791	584	708	617	1106	288
AGAGCGTGGGAGGACCACAG	AGT_AGAGCGTGGGAGGACCACAG	AGT	648	274	310	432	550	64	161
CTTACCTTGGAAGTGGACGT	AGT_CTTACCTTGGAAGTGGACGT	AGT	872	525	470	352	246	570	615
TGTCCTTCCAAGGAACACCC	AGT_TGTCCTTCCAAGGAACACCC	AGT	76	269	649	186	329	492	214
TTGACACCGAAGACAAGTTG	AGT_TTGACACCGAAGACAAGTTG	AGT	1449	831	986	836	883	314	646
CAAGCATTGTGCGTCGAAGG	AGTR1_CAAGCATTGTGCGTCGAAGG	AGTR1	223	239	171	209	212	221	1304
GCTGTGTAGACAGCCCATAG	AGTR1_GCTGTGTAGACAGCCCATAG	AGTR1	261	412	257	534	164	3343	164
GTAGAAACACACTAGCGTAC	AGTR1_GTAGAAACACACTAGCGTAC	AGTR1	131	250	237	244	231	129	147
TCAGGCCCAGCCCTATCGGG	AGTR1_TCAGGCCCAGCCCTATCGGG	AGTR1	376	473	653	400	415	94	607
ACAGGCCATACACCAAACAA	AGTR2_ACAGGCCATACACCAAACAA	AGTR2	1016	1104	1185	1146	1391	511	612
ATTGGGCATATTTCTCAGGT	AGTR2_ATTGGGCATATTTCTCAGGT	AGTR2	751	789	1086	757	1040	377	478
GGAGTAAATCAGCCACAGCG	AGTR2_GGAGTAAATCAGCCACAGCG	AGTR2	219	582	1195	436	987	827	14260
GTACCTATCAACACTCATGC	AGTR2_GTACCTATCAACACTCATGC	AGTR2	1144	1150	739	956	1020	861	647
CACAGACTGGAAATCCTCGG	APLNR_CACAGACTGGAAATCCTCGG	APLNR	174	259	163	428	189	249	1116
CATGGTGTTACGCACCACCG	APLNR_CATGGTGTTACGCACCACCG	APLNR	415	429	285	404	328	274	192
GGGCACCACAAAGCCCACGG	APLNR_GGGCACCACAAAGCCCACGG	APLNR	159	201	285	161	192	238	102
GTCATAGTCCCGGTACGTGT	APLNR_GTCATAGTCCCGGTACGTGT	APLNR	599	656	316	399	330	251	71
CCCCTTTACATGGACCGGCA	AGXT_CCCCTTTACATGGACCGGCA	AGXT	88	375	562	214	660	633	362
CCGATGACCAAGGACCCTGG	AGXT_CCGATGACCAAGGACCCTGG	AGXT	340	469	426	458	491	1725	943
GCTGCTGTTCTTAACCCACG	AGXT_GCTGCTGTTCTTAACCCACG	AGXT	313	195	300	238	217	429	749
GTCACTGAAGGAGATGAGCG	AGXT_GTCACTGAAGGAGATGAGCG	AGXT	464	347	649	264	401	989	750
GAGCACAAATCAAGCGCAGG	NR0B1_GAGCACAAATCAAGCGCAGG	NR0B1	180	374	486	430	432	544	82
GAGCGCAAAGCAAACGTACG	NR0B1_GAGCGCAAAGCAAACGTACG	NR0B1	69	349	195	106	136	61	37
GGTAAAGAGGCGCTACCAGG	NR0B1_GGTAAAGAGGCGCTACCAGG	NR0B1	27	385	316	291	252	113	143
TAGCTCAAAGCAAACGCACG	NR0B1_TAGCTCAAAGCAAACGCACG	NR0B1	154	718	526	433	413	383	930
AACATGATTCTGGACGACGG	AHCY_AACATGATTCTGGACGACGG	AHCY	446	55	55	206	366	2	6
CTCTGAGGAGACCACGACTG	AHCY_CTCTGAGGAGACCACGACTG	AHCY	129	66	73	179	278	3	18
GATGATGTCAATACAGCCTG	AHCY_GATGATGTCAATACAGCCTG	AHCY	539	22	40	128	145	3	1
GCGGGCTCCGAAACCCCGCA	AHCY_GCGGGCTCCGAAACCCCGCA	AHCY	9	342	642	395	366	277	83
ATCGCAAACAAAGCCAACTG	AHR_ATCGCAAACAAAGCCAACTG	AHR	880	1021	1116	883	1209	117	76
CTTACTTCGGATATGGGACT	AHR_CTTACTTCGGATATGGGACT	AHR	1308	1237	1262	956	1150	86	179
TACCACATCCACTCTAAGCA	AHR_TACCACATCCACTCTAAGCA	AHR	496	919	1207	828	1243	297	317
TTATAACAGACTACTGTCTG	AHR_TTATAACAGACTACTGTCTG	AHR	1199	838	945	935	905	26	290
AGACACTGTAAACTCCACAT	AHSG_AGACACTGTAAACTCCACAT	AHSG	111	197	421	348	577	51	64
AGATTGATGAAGTAAAGGTG	AHSG_AGATTGATGAAGTAAAGGTG	AHSG	196	192	385	239	436	542	43
GCAACACTCAGTGAGAAGCT	AHSG_GCAACACTCAGTGAGAAGCT	AHSG	472	255	437	243	346	304	2032
GTTGTCTATAAATCAGCCCT	AHSG_GTTGTCTATAAATCAGCCCT	AHSG	241	253	115	312	188	693	624
AAAAGCTTTCGGACTGCTGA	AIF1_AAAAGCTTTCGGACTGCTGA	AIF1	343	276	439	304	376	88	66
CAAACTCCATGTATTTCTCT	AIF1_CAAACTCCATGTATTTCTCT	AIF1	503	276	395	409	511	15	74
TGCTATATTTGGGATCGTCT	AIF1_TGCTATATTTGGGATCGTCT	AIF1	525	366	268	272	439	407	423
TTTCAGGGACATGATATCTG	AIF1_TTTCAGGGACATGATATCTG	AIF1	608	572	992	469	856	227	562
AAATGGTCTTCGTGAATAGG	AIM1_AAATGGTCTTCGTGAATAGG	AIM1	407	740	602	610	673	948	349
AGAAACCAAAGTTACCGTCT	AIM1_AGAAACCAAAGTTACCGTCT	AIM1	218	344	711	396	586	283	519
GCCCAGGAACCATTTCGGCG	AIM1_GCCCAGGAACCATTTCGGCG	AIM1	503	440	327	355	346	167	28
GTGTCACAGCCCACGACTGA	AIM1_GTGTCACAGCCCACGACTGA	AIM1	203	679	552	263	601	715	684
AAGAGTTTGAGCGACGGGTA	AK1_AAGAGTTTGAGCGACGGGTA	AK1	1042	1086	996	966	1129	887	626
AGTATTGACTTTGGCCACCA	AK1_AGTATTGACTTTGGCCACCA	AK1	816	837	696	644	682	785	788
GATTGATGGCTACCCGCGGG	AK1_GATTGATGGCTACCCGCGGG	AK1	379	176	186	182	211	75	15
GCCCTGAGACCATGACCCAG	AK1_GCCCTGAGACCATGACCCAG	AK1	900	590	905	547	1057	1021	699
AGGCTGATTCACCCCAAGAG	AK2_AGGCTGATTCACCCCAAGAG	AK2	395	160	99	226	162	58	63
ATGGATGCTGGGAAACTGGT	AK2_ATGGATGCTGGGAAACTGGT	AK2	1795	1429	1649	1175	1577	290	1080
GTCCCTTTACCGGCCCCGGG	AK2_GTCCCTTTACCGGCCCCGGG	AK2	812	677	707	761	617	1064	152
GTGAGGCAGGCAGAAATGGT	AK2_GTGAGGCAGGCAGAAATGGT	AK2	1241	968	953	927	994	1210	391
ATTCTTACATGTACATGAGG	AK4_ATTCTTACATGTACATGAGG	AK4	784	731	906	335	678	463	1982
GAGAACATCAAGGCCAGCAC	AK4_GAGAACATCAAGGCCAGCAC	AK4	811	813	713	683	687	429	391
GTGCCCTTGCCCGAGCCGGG	AK4_GTGCCCTTGCCCGAGCCGGG	AK4	572	590	695	454	729	664	260
TCCGAGTTGGAGAACAGGCG	AK4_TCCGAGTTGGAGAACAGGCG	AK4	473	752	820	485	616	406	467
CCTGCACTCGGAGAAGAACG	AKT1_CCTGCACTCGGAGAAGAACG	AKT1	620	630	488	480	393	200	212
GAAGGTGCGTTCGATGACAG	AKT1_GAAGGTGCGTTCGATGACAG	AKT1	835	534	541	457	429	163	131
TGTCATGGAGTACGCCAACG	AKT1_TGTCATGGAGTACGCCAACG	AKT1	741	696	761	805	632	742	871
TGTTGAGGGGAGCCTCACGT	AKT1_TGTTGAGGGGAGCCTCACGT	AKT1	883	265	548	457	720	46	702
CTCTTGAGTACTTGCACTCG	AKT2_CTCTTGAGTACTTGCACTCG	AKT2	1266	1015	854	1132	828	650	589
GACCCCATGGACTACAAGTG	AKT2_GACCCCATGGACTACAAGTG	AKT2	949	1063	931	802	915	820	2230
GGGGGGTAGAGTCTGATCAG	AKT2_GGGGGGTAGAGTCTGATCAG	AKT2	709	208	342	282	435	102	88
TCTCGTCTGGAGAATCCACG	AKT2_TCTCGTCTGGAGAATCCACG	AKT2	0	0	0	0	0	0	0
AGACTCACGTGACAAAGATG	ALAD_AGACTCACGTGACAAAGATG	ALAD	525	483	203	456	310	403	58
ATGGATTGCCTCAATAGCTG	ALAD_ATGGATTGCCTCAATAGCTG	ALAD	421	250	468	171	335	350	89
CACACAGGTATGGTGTGAAG	ALAD_CACACAGGTATGGTGTGAAG	ALAD	388	474	453	402	437	1028	891
GGACATGATGGATGGACGCG	ALAD_GGACATGATGGATGGACGCG	ALAD	159	603	646	498	389	372	824
ACAGATCAAAGAAACCCCTC	ALAS1_ACAGATCAAAGAAACCCCTC	ALAS1	455	346	290	393	426	225	135
CCACAATCTTGGGGACTGAG	ALAS1_CCACAATCTTGGGGACTGAG	ALAS1	762	933	974	671	740	146	187
TCGAATCCCTTGGATCATGG	ALAS1_TCGAATCCCTTGGATCATGG	ALAS1	904	685	946	739	1033	363	1338
TGGTGCAGTAATGACTACCT	ALAS1_TGGTGCAGTAATGACTACCT	ALAS1	432	658	652	823	684	384	125
AATCCACCTTAAGGCAACAA	ALAS2_AATCCACCTTAAGGCAACAA	ALAS2	745	603	550	639	460	1434	312
ACATCACACAACTCCTCGAG	ALAS2_ACATCACACAACTCCTCGAG	ALAS2	628	837	564	448	557	520	396
AGGCACCAGTAAGTTTCATG	ALAS2_AGGCACCAGTAAGTTTCATG	ALAS2	924	768	690	541	843	853	701
ATCCAAGGTATCCGTAACAG	ALAS2_ATCCAAGGTATCCGTAACAG	ALAS2	382	283	280	487	293	56	214
ACTTTGGCATAGCATTCATG	ALB_ACTTTGGCATAGCATTCATG	ALB	403	707	589	356	372	232	1339
CCTCTGGTCTCACCAATCGG	ALB_CCTCTGGTCTCACCAATCGG	ALB	368	713	1016	708	840	558	745
GCAACTCTTCGTGAAACCTA	ALB_GCAACTCTTCGTGAAACCTA	ALB	271	450	639	404	390	417	459
TCTTATCTACTTACATGCCC	ALB_TCTTATCTACTTACATGCCC	ALB	424	337	322	538	388	117	51
ATCCAGATGGCAATATCACA	ALCAM_ATCCAGATGGCAATATCACA	ALCAM	410	756	865	604	799	281	427
CTTACACACTGACGGATGTG	ALCAM_CTTACACACTGACGGATGTG	ALCAM	922	1255	1245	1136	1083	676	3512
TGAGGTACGTCAAGTCGGCA	ALCAM_TGAGGTACGTCAAGTCGGCA	ALCAM	444	606	743	399	590	715	281
TGTGTGCATGCTAGTAACTG	ALCAM_TGTGTGCATGCTAGTAACTG	ALCAM	319	487	402	410	217	260	194
AGTTCCTCATGAAGTATGTG	ABCD1_AGTTCCTCATGAAGTATGTG	ABCD1	420	719	671	666	790	2626	168
CTACATGCACTCGCGTGTGG	ABCD1_CTACATGCACTCGCGTGTGG	ABCD1	362	393	472	371	378	87	124
GATCATGTCGTCGTACAAGG	ABCD1_GATCATGTCGTCGTACAAGG	ABCD1	574	675	536	678	527	434	262
GGCCACATACACCGACAGGA	ABCD1_GGCCACATACACCGACAGGA	ABCD1	708	1163	766	885	1014	418	887
AGCATCCATAGTACGCCACG	ALDH1A1_AGCATCCATAGTACGCCACG	ALDH1A1	1186	1716	1415	1247	1239	536	1081
AGCCTTCACAGGATCAACAG	ALDH1A1_AGCCTTCACAGGATCAACAG	ALDH1A1	907	920	838	503	928	252	209
GAATGGCATGATTCAGTGAG	ALDH1A1_GAATGGCATGATTCAGTGAG	ALDH1A1	615	1136	1231	884	1029	618	448
TGTTGAATTTGCACACCATG	ALDH1A1_TGTTGAATTTGCACACCATG	ALDH1A1	193	705	960	564	625	549	1043
AGCCTTGGCAACTGGAAACG	ALDH2_AGCCTTGGCAACTGGAAACG	ALDH2	1319	860	1426	879	1202	379	855
CAGTGGACGGATTGACGGTG	ALDH2_CAGTGGACGGATTGACGGTG	ALDH2	1536	1716	1799	1305	1554	1175	1267
CGCATGGACGCATCACACAG	ALDH2_CGCATGGACGCATCACACAG	ALDH2	348	1037	788	578	566	1197	749
TTCCACGGCCCAATCCACTG	ALDH2_TTCCACGGCCCAATCCACTG	ALDH2	946	754	1208	1098	1197	523	923
AGGGAAGAGTCCCTGCTACG	ALDH3A1_AGGGAAGAGTCCCTGCTACG	ALDH3A1	248	519	660	462	658	1003	406
CTGTACCCAGTAATCAATGG	ALDH3A1_CTGTACCCAGTAATCAATGG	ALDH3A1	355	758	496	678	515	1391	256
GGAGGTGGTGTACGTCCTAG	ALDH3A1_GGAGGTGGTGTACGTCCTAG	ALDH3A1	249	420	531	488	503	249	75
TTCTCCACAGGAGTTCTACG	ALDH3A1_TTCTCCACAGGAGTTCTACG	ALDH3A1	482	524	726	483	399	1438	273
ATTGTCCAAGGTCTCGAGTG	ALDH1B1_ATTGTCCAAGGTCTCGAGTG	ALDH1B1	198	751	579	362	340	779	126
GGCATCCATCCGGCGCCATG	ALDH1B1_GGCATCCATCCGGCGCCATG	ALDH1B1	452	436	636	357	579	155	669
GTGCCCAATGACCTCCCCGG	ALDH1B1_GTGCCCAATGACCTCCCCGG	ALDH1B1	942	571	678	702	497	217	601
TCCAACCCTGCATGACCAAG	ALDH1B1_TCCAACCCTGCATGACCAAG	ALDH1B1	255	261	400	129	256	29	47
CAGAGAGCCGAGATAAAGGG	ALDH1A3_CAGAGAGCCGAGATAAAGGG	ALDH1A3	730	583	662	577	496	163	287
CGTCCGCACACACGATGCAG	ALDH1A3_CGTCCGCACACACGATGCAG	ALDH1A3	453	495	227	559	223	1231	27
GAATGGCACGAATCCAAGAG	ALDH1A3_GAATGGCACGAATCCAAGAG	ALDH1A3	863	477	833	460	637	992	599
TGGATGCCCTGAGTCGTGGG	ALDH1A3_TGGATGCCCTGAGTCGTGGG	ALDH1A3	549	462	363	598	357	830	263
CGAGGTGCTGCCCCAATACG	ALDH3B1_CGAGGTGCTGCCCCAATACG	ALDH3B1	269	345	419	132	379	141	405
CTATCCGCTGAACCTGACGC	ALDH3B1_CTATCCGCTGAACCTGACGC	ALDH3B1	337	433	470	390	220	740	802
GCAGTCAGCCTTCGAGTCGG	ALDH3B1_GCAGTCAGCCTTCGAGTCGG	ALDH3B1	614	258	371	224	207	121	137
GGGCAAGAACCCTTGCTACG	ALDH3B1_GGGCAAGAACCCTTGCTACG	ALDH3B1	27	115	180	209	292	23	210
AAGCCGTCAGAAATCAGCCA	ALDH3B2_AAGCCGTCAGAAATCAGCCA	ALDH3B2	1231	888	1217	821	1045	445	3119
AGTAGCAGAACCAGGCCACG	ALDH3B2_AGTAGCAGAACCAGGCCACG	ALDH3B2	212	643	743	482	610	210	399
TGGGCGGACCCCAGGAGACA	ALDH3B2_TGGGCGGACCCCAGGAGACA	ALDH3B2	273	434	561	527	711	431	39
TGGTCCTCATCATCGCACCC	ALDH3B2_TGGTCCTCATCATCGCACCC	ALDH3B2	638	690	1143	395	715	332	452
ATATGAACAATGCTGTAAAG	ALDH9A1_ATATGAACAATGCTGTAAAG	ALDH9A1	321	465	364	797	452	692	245
GAGCGGCTGCGACACGACGA	ALDH9A1_GAGCGGCTGCGACACGACGA	ALDH9A1	626	932	650	669	597	1211	276
GTATAACCAAACGATCCACC	ALDH9A1_GTATAACCAAACGATCCACC	ALDH9A1	790	521	652	491	662	533	340
TCTGTGTCAGCATCCCGATG	ALDH9A1_TCTGTGTCAGCATCCCGATG	ALDH9A1	159	180	291	175	189	167	254
GATGAGGCCACACGCTACAT	ALDH3A2_GATGAGGCCACACGCTACAT	ALDH3A2	270	572	564	421	490	149	427
TCTCCCTCAGTATTTAGACC	ALDH3A2_TCTCCCTCAGTATTTAGACC	ALDH3A2	0	0	0	0	0	0	0
TGGGGAAAATACATGAATTG	ALDH3A2_TGGGGAAAATACATGAATTG	ALDH3A2	621	756	719	891	568	238	244
TGGTGCTGATAATCGGAGCT	ALDH3A2_TGGTGCTGATAATCGGAGCT	ALDH3A2	757	1861	1696	1607	1749	3376	326
ATTACCTCTCAGTGACACAT	ABCD2_ATTACCTCTCAGTGACACAT	ABCD2	488	1083	844	820	652	1907	539
CCCTGACCAATCTCTTACGG	ABCD2_CCCTGACCAATCTCTTACGG	ABCD2	699	510	762	650	653	674	328
CCTTATTGCACTGTTGACGA	ABCD2_CCTTATTGCACTGTTGACGA	ABCD2	864	561	898	631	669	385	548
CTGGAGCTGATGCTATTGAA	ABCD2_CTGGAGCTGATGCTATTGAA	ABCD2	620	892	799	491	702	1614	463
AATGGCGAGACTACCACCCA	ALDOA_AATGGCGAGACTACCACCCA	ALDOA	788	0	27	34	31	0	0
AGGATGACACCCCCAATGCA	ALDOA_AGGATGACACCCCCAATGCA	ALDOA	2231	69	52	122	105	5	80
CAAGTTATCAAATCCAAGGG	ALDOA_CAAGTTATCAAATCCAAGGG	ALDOA	643	8	9	71	33	7	0
CTGAGTGCAAGCATGGCCTG	ALDOA_CTGAGTGCAAGCATGGCCTG	ALDOA	1301	14	0	44	42	12	4
AAAACACTGAAGAGAACCGC	ALDOB_AAAACACTGAAGAGAACCGC	ALDOB	893	335	447	470	393	137	406
GGTACCTATTGTTGAACCAG	ALDOB_GGTACCTATTGTTGAACCAG	ALDOB	868	296	269	512	164	149	418
TATCCACAGTTAGACCAAGG	ALDOB_TATCCACAGTTAGACCAAGG	ALDOB	566	549	831	599	701	1473	253
TCCATCAACCAGAGCATCGG	ALDOB_TCCATCAACCAGAGCATCGG	ALDOB	517	276	264	337	355	36	90
CCAGGATAAGGGCATCGTCG	ALDOC_CCAGGATAAGGGCATCGTCG	ALDOC	1286	561	811	561	702	407	203
GCCCGGGGCTACAATCCGCA	ALDOC_GCCCGGGGCTACAATCCGCA	ALDOC	968	1038	590	792	747	921	355
GCGGCTGAGCCAAATTGGGG	ALDOC_GCGGCTGAGCCAAATTGGGG	ALDOC	704	464	687	422	652	262	121
GTATACATGATGGTCACTCA	ALDOC_GTATACATGATGGTCACTCA	ALDOC	1571	936	1078	1143	1297	372	1393
CACCAACATTCTGGACACGT	AKR1B1_CACCAACATTCTGGACACGT	AKR1B1	252	359	288	415	223	128	44
CATGGGCACAGTCGATGTGG	AKR1B1_CATGGGCACAGTCGATGTGG	AKR1B1	14	371	239	222	224	17	241
TGGTGCACGTACCATGAGAA	AKR1B1_TGGTGCACGTACCATGAGAA	AKR1B1	695	1096	696	790	701	385	772
TGTTTAAGATCATCTCCACC	AKR1B1_TGTTTAAGATCATCTCCACC	AKR1B1	346	419	620	529	467	121	292
CCATACCTTAAATACGTAGG	ALK_CCATACCTTAAATACGTAGG	ALK	775	452	497	489	584	289	132
CTCTATTGCAGTTAGCGGAG	ALK_CTCTATTGCAGTTAGCGGAG	ALK	428	365	406	283	389	153	339
CTGTAGCACTTTCAGAAGCG	ALK_CTGTAGCACTTTCAGAAGCG	ALK	391	402	662	536	662	94	557
TCCAGACAACCCATTTCGAG	ALK_TCCAGACAACCCATTTCGAG	ALK	52	120	144	132	225	20	76
CCCCCATATCCGCTACACCA	ALOX12_CCCCCATATCCGCTACACCA	ALOX12	861	1068	1164	1038	1018	434	533
TCCAAATATGAGATTCCATG	ALOX12_TCCAAATATGAGATTCCATG	ALOX12	304	593	595	637	478	278	772
TCCATCTTCAGCATAACGAG	ALOX12_TCCATCTTCAGCATAACGAG	ALOX12	689	710	650	847	665	451	276
TGAAGCTCTTCCATCCCCGA	ALOX12_TGAAGCTCTTCCATCCCCGA	ALOX12	946	763	832	565	864	947	205
AACTCGATGTAGTCCCCGTG	ALOX5_AACTCGATGTAGTCCCCGTG	ALOX5	534	631	548	451	297	346	238
CATCGATGCCAAATGCCACA	ALOX5_CATCGATGCCAAATGCCACA	ALOX5	359	788	773	495	375	1112	843
GGATTCATACGACGTGACTG	ALOX5_GGATTCATACGACGTGACTG	ALOX5	493	472	524	567	427	155	333
TAGAGCGGGTCATGAATCAC	ALOX5_TAGAGCGGGTCATGAATCAC	ALOX5	392	514	260	474	332	418	53
AAAGCAGGACCCAGAATGGG	ALOX5AP_AAAGCAGGACCCAGAATGGG	ALOX5AP	966	934	1427	941	1268	1430	659
AGAGCACAGCGAGGAAAGTG	ALOX5AP_AGAGCACAGCGAGGAAAGTG	ALOX5AP	1409	1136	1312	1130	1195	342	922
GCGGGGCTACTTTGCAGCCA	ALOX5AP_GCGGGGCTACTTTGCAGCCA	ALOX5AP	1170	1162	1139	1076	1091	1991	806
GGCAGTGTAGACCCGCTCAA	ALOX5AP_GGCAGTGTAGACCCGCTCAA	ALOX5AP	439	682	1112	766	1128	1192	879
CAAGACGTGGGTACGCTATG	ALOX12B_CAAGACGTGGGTACGCTATG	ALOX12B	696	846	965	663	853	681	1634
CCAGTTACCGCCCTCCGGTG	ALOX12B_CCAGTTACCGCCCTCCGGTG	ALOX12B	969	1033	1003	694	987	83	586
GTTCCCCGTCACAGACGACA	ALOX12B_GTTCCCCGTCACAGACGACA	ALOX12B	723	739	771	952	815	346	160
TGCACATAGTTGCAGTACCA	ALOX12B_TGCACATAGTTGCAGTACCA	ALOX12B	484	537	781	774	713	504	287
AAGCGACTGTGGCCCGCACG	ALOX15_AAGCGACTGTGGCCCGCACG	ALOX15	249	438	381	429	486	66	174
CAAACTATATGACCTCCCTG	ALOX15_CAAACTATATGACCTCCCTG	ALOX15	404	169	298	233	314	240	534
CAATTTCAGCATGACTAGAG	ALOX15_CAATTTCAGCATGACTAGAG	ALOX15	585	345	425	381	315	395	154
TTCCAGGGTGTATCGCAGGT	ALOX15_TTCCAGGGTGTATCGCAGGT	ALOX15	339	770	675	800	530	1855	339
GACAGCGGCGGATCAGGACA	ALOX15B_GACAGCGGCGGATCAGGACA	ALOX15B	329	557	344	449	405	371	94
TCCTTGCCGAGATTGTCCAG	ALOX15B_TCCTTGCCGAGATTGTCCAG	ALOX15B	380	686	652	435	687	68	205
TGCCGAGTTCTCCTTCCATG	ALOX15B_TGCCGAGTTCTCCTTCCATG	ALOX15B	767	856	930	835	751	625	179
TGGGAAGCCTCAGTTCTCTG	ALOX15B_TGGGAAGCCTCAGTTCTCTG	ALOX15B	543	582	342	548	374	1354	571
CAACACGACACGCGGCAATG	ALPI_CAACACGACACGCGGCAATG	ALPI	392	617	578	571	638	588	154
CATGATGACCATGGTCGATG	ALPI_CATGATGACCATGGTCGATG	ALPI	585	408	267	264	198	719	75
CCGTTCGCAGACATACAATG	ALPI_CCGTTCGCAGACATACAATG	ALPI	351	203	267	244	382	54	230
GATCCACCGAGACCCCACAC	ALPI_GATCCACCGAGACCCCACAC	ALPI	494	273	179	206	229	238	111
AGCTCTTCCAGGTGTCAACG	ALPL_AGCTCTTCCAGGTGTCAACG	ALPL	1234	1186	1162	781	1055	461	712
CATTGGCCTTCACCCCACAC	ALPL_CATTGGCCTTCACCCCACAC	ALPL	456	619	691	544	472	309	106
GATGACATTCTTAGCCACGT	ALPL_GATGACATTCTTAGCCACGT	ALPL	1370	437	682	403	470	428	1882
GGCATGGTTCACTCTCGTGG	ALPL_GGCATGGTTCACTCTCGTGG	ALPL	388	506	672	545	759	1536	135
CCCGGACTTCTGGAACCGCG	ALPP_CCCGGACTTCTGGAACCGCG	ALPP	403	722	880	860	1002	318	875
CGAAAGTACATGTTTCGCAT	ALPP_CGAAAGTACATGTTTCGCAT	ALPP	311	192	306	210	120	108	134
CGGCGTCCGAGTACCAGTTG	ALPP_CGGCGTCCGAGTACCAGTTG	ALPP	1323	1153	1416	1020	1143	1854	1314
TTGTCTACATTGTATGTCTG	ALPP_TTGTCTACATTGTATGTCTG	ALPP	828	921	1687	780	1711	413	2086
CGGCATCCGAGTACCAGTTG	ALPPL2_CGGCATCCGAGTACCAGTTG	ALPPL2	902	644	463	562	611	313	935
TCGCACATCAATGTCCATGT	ALPPL2_TCGCACATCAATGTCCATGT	ALPPL2	422	656	921	630	608	1680	331
TGGCTCACTCACCGTCACCC	ALPPL2_TGGCTCACTCACCGTCACCC	ALPPL2	455	932	1304	530	749	547	1032
TTGTCTACACTGTATGTCTG	ALPPL2_TTGTCTACACTGTATGTCTG	ALPPL2	916	1119	1105	1124	1032	1530	831
GCCGCGCGTTACCTTCCGCG	ALX3_GCCGCGCGTTACCTTCCGCG	ALX3	238	383	382	380	316	185	240
GCTGCCCTTGGACTGCCGAG	ALX3_GCTGCCCTTGGACTGCCGAG	ALX3	559	802	1112	922	1013	579	380
GGAATGTGCTGAAGGTCGTG	ALX3_GGAATGTGCTGAAGGTCGTG	ALX3	1406	1356	1108	995	943	470	1074
TCCTGCAGGTACTTGGCGGG	ALX3_TCCTGCAGGTACTTGGCGGG	ALX3	722	652	608	511	577	1193	803
CATGATGCCAAGTCTGGCAG	AMBN_CATGATGCCAAGTCTGGCAG	AMBN	1191	689	1062	751	622	1303	774
CCCGGTGTTCCAGATTGCTG	AMBN_CCCGGTGTTCCAGATTGCTG	AMBN	1200	1273	1143	985	1087	798	915
TTATCTGTAATATAGCTCCC	AMBN_TTATCTGTAATATAGCTCCC	AMBN	693	562	795	588	584	195	84
TTATCTGTGATATAGCTCCC	AMBN_TTATCTGTGATATAGCTCCC	AMBN	600	694	1014	1061	941	493	849
CCTAGGTGAATGTGTCCCTG	AMBP_CCTAGGTGAATGTGTCCCTG	AMBP	207	527	442	455	297	145	262
TAGAGCTTGGCAGTAATGGT	AMBP_TAGAGCTTGGCAGTAATGGT	AMBP	247	284	356	331	346	188	156
TGCAGAATGGAACATAACCA	AMBP_TGCAGAATGGAACATAACCA	AMBP	402	107	249	172	235	329	35
TTCTAGGAAAGGTGTCTGTG	AMBP_TTCTAGGAAAGGTGTCTGTG	AMBP	518	416	537	454	558	1164	202
AAGCTTGCTAGGGATTACAG	AMD1_AAGCTTGCTAGGGATTACAG	AMD1	327	52	103	14	130	25	75
AATTCCGGTGTGGGTACCCT	AMD1_AATTCCGGTGTGGGTACCCT	AMD1	684	329	451	356	379	164	228
ATCTTCGCACTATCCCAAGG	AMD1_ATCTTCGCACTATCCCAAGG	AMD1	0	179	211	287	363	71	205
CCCACAAGGATTGAACATTG	AMD1_CCCACAAGGATTGAACATTG	AMD1	112	68	137	164	228	34	34
ACAGCACGGGGATGATTTGG	AMELX_ACAGCACGGGGATGATTTGG	AMELX	1106	1266	1460	1015	1402	1168	589
CGGGCATCATTGGTTGCTGG	AMELX_CGGGCATCATTGGTTGCTGG	AMELX	725	1186	1342	1283	1248	535	1863
GGATTGGAGTCATGGAGTGT	AMELX_GGATTGGAGTCATGGAGTGT	AMELX	1008	1332	1844	844	1399	1006	1666
TGGGCTCGTAACCATAGGAA	AMELX_TGGGCTCGTAACCATAGGAA	AMELX	657	529	390	242	408	346	121
CAGGCATCAGTGCTTGCTGG	AMELY_CAGGCATCAGTGCTTGCTGG	AMELY	272	403	435	461	372	65	332
CGTAACCATAGGAAGAGTAC	AMELY_CGTAACCATAGGAAGAGTAC	AMELY	261	685	1104	549	726	591	948
GATGTGGTGATGAGACTGCA	AMELY_GATGTGGTGATGAGACTGCA	AMELY	410	731	762	592	486	196	371
GCACCACCAAATCATCCCCG	AMELY_GCACCACCAAATCATCCCCG	AMELY	192	715	842	562	443	1260	423
ACAGGGACAGGACTCGACCG	AMFR_ACAGGGACAGGACTCGACCG	AMFR	815	1561	1600	986	1641	965	466
CCTCAACCACGAAGGGACGT	AMFR_CCTCAACCACGAAGGGACGT	AMFR	730	1288	1190	966	1066	790	262
GCACAAGAACTATCTACGTG	AMFR_GCACAAGAACTATCTACGTG	AMFR	622	437	666	861	577	153	178
TGTCTCTCACTCACTCGAAG	AMFR_TGTCTCTCACTCACTCGAAG	AMFR	427	535	1017	573	642	758	55
GCAGGGCCTAGTCAACCTGT	AMH_GCAGGGCCTAGTCAACCTGT	AMH	1134	695	910	691	679	960	254
GCGGACCTACCCTCTCCGCG	AMH_GCGGACCTACCCTCTCCGCG	AMH	300	578	759	617	709	352	364
GGGAGCCAACACCCTCGCTG	AMH_GGGAGCCAACACCCTCGCTG	AMH	484	793	773	606	659	1417	96
TCTTCCGAGAAGACTTGGAC	AMH_TCTTCCGAGAAGACTTGGAC	AMH	648	576	751	613	454	496	679
CAGTGATAAATCGGACAATG	AMHR2_CAGTGATAAATCGGACAATG	AMHR2	887	408	604	335	579	125	91
CCCACAGGCCAATATAAACC	AMHR2_CCCACAGGCCAATATAAACC	AMHR2	646	220	439	239	331	175	853
CCCCAGCAGGTAATCCGGGA	AMHR2_CCCCAGCAGGTAATCCGGGA	AMHR2	789	641	721	652	678	485	347
CGAAAGAACTACAGAGTGCG	AMHR2_CGAAAGAACTACAGAGTGCG	AMHR2	309	399	984	367	590	652	2711
ACAGTAAGACCTATACCCAC	AMPD1_ACAGTAAGACCTATACCCAC	AMPD1	362	498	479	526	520	122	104
CAAGGACCAACTCACCCCAG	AMPD1_CAAGGACCAACTCACCCCAG	AMPD1	114	149	227	44	293	2	89
GCAGGTACATACTAGATCCT	AMPD1_GCAGGTACATACTAGATCCT	AMPD1	278	198	178	162	142	39	119
TATCACCTCAAAATGAAGGA	AMPD1_TATCACCTCAAAATGAAGGA	AMPD1	26	176	324	192	236	81	287
GAGACCCGGACCTATGAACA	AMPD2_GAGACCCGGACCTATGAACA	AMPD2	309	148	201	305	316	67	34
GGTGCACGTCTACACCCGCA	AMPD2_GGTGCACGTCTACACCCGCA	AMPD2	227	225	238	212	373	199	107
TGCCAAATACAACCCTATTG	AMPD2_TGCCAAATACAACCCTATTG	AMPD2	444	171	156	249	212	145	29
TGCCCCGTATGAGTTCCCCG	AMPD2_TGCCCCGTATGAGTTCCCCG	AMPD2	367	143	323	193	325	30	71
AAAACTGAAAACTATCTGGG	AMPD3_AAAACTGAAAACTATCTGGG	AMPD3	609	441	576	452	646	951	1627
CACCTCACTTACTAAATCCG	AMPD3_CACCTCACTTACTAAATCCG	AMPD3	854	745	851	664	706	294	439
TCACGTTATAGAAGTCCCGG	AMPD3_TCACGTTATAGAAGTCCCGG	AMPD3	288	283	329	227	320	84	912
TGATCCGGGAGAAGTATGCG	AMPD3_TGATCCGGGAGAAGTATGCG	AMPD3	448	492	559	446	329	175	1528
AGACTTCCATCAAAAACTCG	AMPH_AGACTTCCATCAAAAACTCG	AMPH	720	504	598	154	467	32	81
ATTGCCCTGGGACCTATGGA	AMPH_ATTGCCCTGGGACCTATGGA	AMPH	133	526	358	445	398	396	116
GGTGTCTTTGCAATGCGGAG	AMPH_GGTGTCTTTGCAATGCGGAG	AMPH	272	238	202	310	336	91	20
TCCAACACTAGGCATGCAGG	AMPH_TCCAACACTAGGCATGCAGG	AMPH	250	269	691	246	477	36	143
ACCTGGCCTCCGTCAAAGGT	BIN1_ACCTGGCCTCCGTCAAAGGT	BIN1	822	971	1169	711	818	1170	673
AGTCACGCATTGCCAAGCGG	BIN1_AGTCACGCATTGCCAAGCGG	BIN1	613	755	1417	775	1220	951	576
CATCACTCCTACCTGAGATG	BIN1_CATCACTCCTACCTGAGATG	BIN1	539	779	694	560	835	358	873
TGAGGCAAACAAGATCGCAG	BIN1_TGAGGCAAACAAGATCGCAG	BIN1	527	477	576	554	527	255	366
ACTGTCGCTGTTTACCAACG	AMT_ACTGTCGCTGTTTACCAACG	AMT	1007	1758	1622	1350	933	1038	309
AGAGGGGGTATACCTGCATG	AMT_AGAGGGGGTATACCTGCATG	AMT	670	674	831	1025	1151	323	328
CCAGGTACTACAGGCCGGCG	AMT_CCAGGTACTACAGGCCGGCG	AMT	220	560	519	436	346	247	325
TGTAGCCACAGCGGGTCACG	AMT_TGTAGCCACAGCGGGTCACG	AMT	146	166	385	96	280	23	82
AAGACAAGCGCTCTGTCAGA	AMY1A_AAGACAAGCGCTCTGTCAGA	AMY1A	1145	453	730	603	724	83	394
CAACACCAATGTCAATGAGA	AMY1A_CAACACCAATGTCAATGAGA	AMY1A	780	461	583	316	518	70	429
GTGACTAGATGCAACAATGT	AMY1A_GTGACTAGATGCAACAATGT	AMY1A	485	294	332	233	209	95	54
TGAGCGATATTTAGCTCCCA	AMY1A_TGAGCGATATTTAGCTCCCA	AMY1A	573	335	414	525	610	717	728
AACAGTAACTGGTTCCCGGA	AMY1B_AACAGTAACTGGTTCCCGGA	AMY1B	473	816	903	661	821	1044	286
AATCAACGAGGACATGGCGC	AMY1B_AATCAACGAGGACATGGCGC	AMY1B	329	438	647	526	535	292	261
GACTAGATGCAACAATGTTG	AMY1B_GACTAGATGCAACAATGTTG	AMY1B	508	450	284	504	412	294	131
GTCTTCTCGATCTTGCACTG	AMY1B_GTCTTCTCGATCTTGCACTG	AMY1B	755	807	675	758	668	458	1783
ATGAACCATCTCATTGACAT	AMY1C_ATGAACCATCTCATTGACAT	AMY1C	364	589	469	595	509	122	714
GAACTATAATGATGCTACTC	AMY1C_GAACTATAATGATGCTACTC	AMY1C	26	21	172	149	198	0	35
GCTGTAATTAATCATATGTG	AMY1C_GCTGTAATTAATCATATGTG	AMY1C	179	189	191	289	206	147	17
TAGCTCCCAAGGGATTTGGA	AMY1C_TAGCTCCCAAGGGATTTGGA	AMY1C	297	277	500	369	406	357	999
GAACTACAATGATGCTACTC	AMY2A_GAACTACAATGATGCTACTC	AMY2A	483	222	121	232	312	167	23
GAGCGATATTTAGCTCCGAA	AMY2A_GAGCGATATTTAGCTCCGAA	AMY2A	116	189	336	210	396	66	176
TGACAATCAACGAGGACATG	AMY2A_TGACAATCAACGAGGACATG	AMY2A	327	440	332	381	330	454	32
TGTGGTAACGCTGTGAGTGC	AMY2A_TGTGGTAACGCTGTGAGTGC	AMY2A	569	146	164	116	223	13	38
AAGACAAGTGCTCTGTCAGA	AMY2B_AAGACAAGTGCTCTGTCAGA	AMY2B	240	225	144	133	215	148	1
ACAGGTCAGAGATTGTCGTC	AMY2B_ACAGGTCAGAGATTGTCGTC	AMY2B	600	636	665	499	506	668	203
ATGAATCATCTCATTGACAT	AMY2B_ATGAATCATCTCATTGACAT	AMY2B	1259	575	573	530	596	170	377
GACTAGATGTAACAATGTTG	AMY2B_GACTAGATGTAACAATGTTG	AMY2B	574	279	204	300	324	191	129
AATGTGTTGATGTCTTTGCA	ANG_AATGTGTTGATGTCTTTGCA	ANG	741	1394	1136	1232	1102	870	2111
ATCCTGAGCCAGGGTCGGTG	ANG_ATCCTGAGCCAGGGTCGGTG	ANG	834	872	998	522	918	367	567
CACTATGATGCCAAACCACA	ANG_CACTATGATGCCAAACCACA	ANG	474	727	784	656	739	206	479
GATACTGTGAAAGCATCATG	ANG_GATACTGTGAAAGCATCATG	ANG	1642	851	1003	806	899	1022	411
AGATATAACCGGATTCAACA	ANGPT1_AGATATAACCGGATTCAACA	ANGPT1	1023	637	794	435	777	606	1058
GCAGAGAGATGCTCCACACG	ANGPT1_GCAGAGAGATGCTCCACACG	ANGPT1	544	931	894	1239	890	739	1152
GCAGCTTGAGAATTACATTG	ANGPT1_GCAGCTTGAGAATTACATTG	ANGPT1	812	856	828	829	618	729	619
TTGCAATATGGATGTCAATG	ANGPT1_TTGCAATATGGATGTCAATG	ANGPT1	464	521	541	467	432	212	946
AAGAACTGAATTATTCACCG	ANGPT2_AAGAACTGAATTATTCACCG	ANGPT2	467	599	430	646	450	193	212
ACCAAACAGCGGAGCAAACG	ANGPT2_ACCAAACAGCGGAGCAAACG	ANGPT2	372	478	507	318	359	469	335
ACCGAGTCATCGTATTCGAG	ANGPT2_ACCGAGTCATCGTATTCGAG	ANGPT2	681	717	586	644	592	110	172
TAACGTGTAGATGCCATTCG	ANGPT2_TAACGTGTAGATGCCATTCG	ANGPT2	642	1014	979	713	825	901	534
CATTCTAGAAACGACAACCA	ANK1_CATTCTAGAAACGACAACCA	ANK1	901	834	767	854	763	698	258
GACGGGAGCCTCGATCGACG	ANK1_GACGGGAGCCTCGATCGACG	ANK1	419	827	1200	1060	851	366	665
GATCAAACACGGCGTCATGG	ANK1_GATCAAACACGGCGTCATGG	ANK1	667	729	1315	667	1272	888	440
TGTACTTCGTGATCATGTCA	ANK1_TGTACTTCGTGATCATGTCA	ANK1	505	599	877	662	734	801	761
AAATGTTAACGCAAAAACCA	ANK2_AAATGTTAACGCAAAAACCA	ANK2	360	553	618	440	437	786	266
ACATTACGGAAATGTCAACG	ANK2_ACATTACGGAAATGTCAACG	ANK2	676	280	352	248	375	234	236
GGGAGAATACCTTAGGCCTG	ANK2_GGGAGAATACCTTAGGCCTG	ANK2	77	188	320	226	260	220	126
TGGTGTGTACCCATTTGTAG	ANK2_TGGTGTGTACCCATTTGTAG	ANK2	0	481	299	274	217	147	136
CATGTGGATGCGCTTTACTG	ANK3_CATGTGGATGCGCTTTACTG	ANK3	441	969	568	665	531	462	1420
GATGAAGTTCGACTGAAGTG	ANK3_GATGAAGTTCGACTGAAGTG	ANK3	495	451	766	563	800	367	750
GGATACACACCACTGCATGT	ANK3_GGATACACACCACTGCATGT	ANK3	622	1220	1145	1070	900	305	438
GGGGCCGTACACTTGCGTGG	ANK3_GGGGCCGTACACTTGCGTGG	ANK3	446	442	511	388	578	79	287
CATCACGCTTATCCACCCCA	ANPEP_CATCACGCTTATCCACCCCA	ANPEP	549	626	778	405	713	1455	1372
CCTTGGACCAAAGTAAAGCG	ANPEP_CCTTGGACCAAAGTAAAGCG	ANPEP	0	346	227	282	225	126	82
CGTTCAGGGCATAATCGCCG	ANPEP_CGTTCAGGGCATAATCGCCG	ANPEP	398	180	652	105	286	48	36
TCACGGTGGATACCAGCACG	ANPEP_TCACGGTGGATACCAGCACG	ANPEP	188	216	328	230	218	42	310
CAAAGGGATCATTGATTGTG	SLC25A4_CAAAGGGATCATTGATTGTG	SLC25A4	119	246	329	111	290	324	82
CCAGACCATGGAACTCACGC	SLC25A4_CCAGACCATGGAACTCACGC	SLC25A4	123	288	326	231	473	878	146
GGGGAAGTAACGGATCACGT	SLC25A4_GGGGAAGTAACGGATCACGT	SLC25A4	555	395	359	239	243	375	419
TGGTAACCTGGCGTCCGGTG	SLC25A4_TGGTAACCTGGCGTCCGGTG	SLC25A4	395	211	185	140	198	44	271
ACACAGGGATGTGGCCCCTG	SLC25A5_ACACAGGGATGTGGCCCCTG	SLC25A5	199	228	375	122	167	30	156
ACCCGTCTAGCAGCTGATGT	SLC25A5_ACCCGTCTAGCAGCTGATGT	SLC25A5	354	241	380	202	286	496	55
AGATACCGAAGTAGGCGGCT	SLC25A5_AGATACCGAAGTAGGCGGCT	SLC25A5	92	48	206	217	190	211	117
GGAGTTCTGTCCTTCTGGCG	SLC25A5_GGAGTTCTGTCCTTCTGGCG	SLC25A5	3	158	168	67	299	477	113
CCAGCGGGTACACGAAGCAG	SLC25A6_CCAGCGGGTACACGAAGCAG	SLC25A6	1612	1198	1585	1035	1209	715	1483
CGAAGTTGAGGGCTTGAGTG	SLC25A6_CGAAGTTGAGGGCTTGAGTG	SLC25A6	1073	1086	1577	1165	1481	2568	965
CGTATCGTACACGCCGAAGT	SLC25A6_CGTATCGTACACGCCGAAGT	SLC25A6	239	124	118	51	87	34	164
GCCGCCGACAAGCAGTACAA	SLC25A6_GCCGCCGACAAGCAGTACAA	SLC25A6	748	976	1509	863	1413	426	1280
AAGGCAGCGACATCCGAGGA	ANXA1_AAGGCAGCGACATCCGAGGA	ANXA1	145	684	495	524	446	306	124
AGAAATCAGAGACATTAACA	ANXA1_AGAAATCAGAGACATTAACA	ANXA1	328	199	250	271	226	16	213
CCTTACAGGTCACCTTGAGG	ANXA1_CCTTACAGGTCACCTTGAGG	ANXA1	770	600	695	468	602	1315	414
TCACACCAAAGTCCTCAGAT	ANXA1_TCACACCAAAGTCCTCAGAT	ANXA1	58	377	223	445	166	391	475
ACAGGGGCTGGGAACCGACG	ANXA2_ACAGGGGCTGGGAACCGACG	ANXA2	194	242	437	105	275	65	348
CAGCCATCAAGACCAAAGGT	ANXA2_CAGCCATCAAGACCAAAGGT	ANXA2	703	698	554	709	451	813	606
GGTCCTTCTCTGGTAGGCGA	ANXA2_GGTCCTTCTCTGGTAGGCGA	ANXA2	225	452	550	225	568	1577	53
TGGGAAACCAACCTTTGCCA	ANXA2_TGGGAAACCAACCTTTGCCA	ANXA2	299	448	599	344	475	82	635
CTGAGAGGTCAAATGCACAG	ANXA3_CTGAGAGGTCAAATGCACAG	ANXA3	272	187	278	111	232	136	202
GAATAGATTCTCTATAAAGC	ANXA3_GAATAGATTCTCTATAAAGC	ANXA3	493	81	103	212	209	2	99
GAGGAAAGCTCCTTAAACAC	ANXA3_GAGGAAAGCTCCTTAAACAC	ANXA3	56	68	354	95	197	19	281
TTTGCATCAAAGACTGCTGG	ANXA3_TTTGCATCAAAGACTGCTGG	ANXA3	92	296	311	171	302	17	41
AACCGAAATCACCTGTTGCA	ANXA4_AACCGAAATCACCTGTTGCA	ANXA4	926	1067	1282	1095	1093	1951	744
ACTGTGGCCTACCCTGCCGA	ANXA4_ACTGTGGCCTACCCTGCCGA	ANXA4	773	699	611	499	389	1789	208
TATGCGCCGGATCTCCTCAG	ANXA4_TATGCGCCGGATCTCCTCAG	ANXA4	178	567	640	807	615	289	91
TTGCACGTCATACAGCACCG	ANXA4_TTGCACGTCATACAGCACCG	ANXA4	240	331	850	427	490	75	730
AATCTCCACGCAATACCTGA	ANXA5_AATCTCCACGCAATACCTGA	ANXA5	455	561	803	386	595	313	1057
ACTCTTCGGAAGGCTATGAA	ANXA5_ACTCTTCGGAAGGCTATGAA	ANXA5	100	197	278	178	172	70	41
AGGCTGGAGAACTTAAATGG	ANXA5_AGGCTGGAGAACTTAAATGG	ANXA5	575	884	1447	1029	1286	3627	1413
ATAAGCATCATAAAGCCGAG	ANXA5_ATAAGCATCATAAAGCCGAG	ANXA5	1099	897	973	778	827	509	765
GAGAAGCTAATGCTGGCCGT	ANXA6_GAGAAGCTAATGCTGGCCGT	ANXA6	390	327	185	287	165	16	139
GCAGGTGGCCTATCAGATGT	ANXA6_GCAGGTGGCCTATCAGATGT	ANXA6	434	240	341	230	335	236	109
GGGAAGCCAAGATCTCAATG	ANXA6_GGGAAGCCAAGATCTCAATG	ANXA6	457	878	428	984	538	1450	481
TTGGCATCGTAATGGGCCGG	ANXA6_TTGGCATCGTAATGGGCCGG	ANXA6	818	639	818	725	555	275	945
AGGAACAAAATACCTGACTA	ANXA7_AGGAACAAAATACCTGACTA	ANXA7	607	321	239	411	324	637	52
ATTTAAGACCTCCTATGGCA	ANXA7_ATTTAAGACCTCCTATGGCA	ANXA7	747	1008	962	837	909	1741	154
CTCCAGGCATCGTAATACGT	ANXA7_CTCCAGGCATCGTAATACGT	ANXA7	205	382	476	411	363	114	71
TACCCACAAGTGCCAAGTAG	ANXA7_TACCCACAAGTGCCAAGTAG	ANXA7	97	363	351	348	283	95	74
AGGACCTCGGCATCTCGCAG	ANXA11_AGGACCTCGGCATCTCGCAG	ANXA11	290	903	519	831	782	3386	62
ATAACGTGGCCACCTATGCG	ANXA11_ATAACGTGGCCACCTATGCG	ANXA11	918	661	1011	657	855	1642	343
CGAGCTACCCAGGATACCCG	ANXA11_CGAGCTACCCAGGATACCCG	ANXA11	165	306	317	256	323	57	111
GGGATGTATCCACCCCCAGG	ANXA11_GGGATGTATCCACCCCCAGG	ANXA11	497	663	551	511	534	375	495
AAACTTCGAGAAGACAGCGT	ANXA13_AAACTTCGAGAAGACAGCGT	ANXA13	1075	884	1030	556	615	401	1273
AGCCTCGAATCAGATGTCAA	ANXA13_AGCCTCGAATCAGATGTCAA	ANXA13	361	720	956	487	741	335	1114
CCTGTGCACGAGGACCAATA	ANXA13_CCTGTGCACGAGGACCAATA	ANXA13	318	732	863	638	818	183	138
GTACAAGGCAACGTACGGCA	ANXA13_GTACAAGGCAACGTACGGCA	ANXA13	424	629	1097	663	756	870	268
AGCGACGAGTCAGTGTACCC	AOAH_AGCGACGAGTCAGTGTACCC	AOAH	1076	1172	1188	715	1117	834	2796
CATGGCATATATAACGATGG	AOAH_CATGGCATATATAACGATGG	AOAH	31	279	393	173	301	0	247
CCTGTAGCACCAGAGAGTTG	AOAH_CCTGTAGCACCAGAGAGTTG	AOAH	72	374	400	325	258	1948	54
TGCTCAAGTTCACAACTCGA	AOAH_TGCTCAAGTTCACAACTCGA	AOAH	420	514	657	298	514	84	1465
AGTCTGCATAGTAGTGCCCA	AOC2_AGTCTGCATAGTAGTGCCCA	AOC2	722	579	771	794	539	756	1199
CTGGGGCGAGAACTGAAGAG	AOC2_CTGGGGCGAGAACTGAAGAG	AOC2	775	578	535	549	457	842	658
GTCACATCCCGCATGTACGA	AOC2_GTCACATCCCGCATGTACGA	AOC2	1113	870	600	636	761	233	1010
TATATGGATGTCCACCATCG	AOC2_TATATGGATGTCCACCATCG	AOC2	252	543	401	453	374	169	672
CATATATAACCTACCACCAA	AOX1_CATATATAACCTACCACCAA	AOX1	224	249	203	445	442	283	345
CTGGTGTGAAGCATGCCACG	AOX1_CTGGTGTGAAGCATGCCACG	AOX1	0	305	50	170	130	337	14
GAGTTATGCATCTCATATGG	AOX1_GAGTTATGCATCTCATATGG	AOX1	631	456	346	267	222	609	157
GGGGTTCTACATACCCACAG	AOX1_GGGGTTCTACATACCCACAG	AOX1	80	177	370	172	182	360	196
CTGGTGAAAGAGTATGCGGC	APAF1_CTGGTGAAAGAGTATGCGGC	APAF1	917	615	594	660	585	449	377
TGAATTTGTATGACCAAACA	APAF1_TGAATTTGTATGACCAAACA	APAF1	666	811	677	837	644	227	258
TTCCTAAGGAACTCTCCACA	APAF1_TTCCTAAGGAACTCTCCACA	APAF1	769	545	957	763	816	332	1189
TTTCCTAATATTGTACAACT	APAF1_TTTCCTAATATTGTACAACT	APAF1	303	395	675	540	651	294	134
AAGATGCCTCATTCCCAAAG	NUDT2_AAGATGCCTCATTCCCAAAG	NUDT2	953	924	861	945	891	1514	75
CAAAAGGGAACTCAATTATG	NUDT2_CAAAAGGGAACTCAATTATG	NUDT2	535	591	683	547	479	1562	72
CATCACTGGACTCCTCCCAA	NUDT2_CATCACTGGACTCCTCCCAA	NUDT2	1087	811	524	1007	717	242	193
GCCAGCTGACCATTATTGAG	NUDT2_GCCAGCTGACCATTATTGAG	NUDT2	615	726	1042	599	820	636	436
CATATGAAGTGGCATCCACA	APOF_CATATGAAGTGGCATCCACA	APOF	508	455	468	300	299	339	86
GGCTCTAAGGAATGCCCTGG	APOF_GGCTCTAAGGAATGCCCTGG	APOF	467	308	412	179	446	390	701
GTGTAGCATTCACACCACCC	APOF_GTGTAGCATTCACACCACCC	APOF	730	598	624	311	672	194	834
TATGCTACTCAAAACTGCCT	APOF_TATGCTACTCAAAACTGCCT	APOF	969	601	794	779	546	498	1138
AGGAAATGGTCCTCAGAGGG	APBA1_AGGAAATGGTCCTCAGAGGG	APBA1	711	784	688	640	553	1804	604
CCAGGGACTGTGACGACCAG	APBA1_CCAGGGACTGTGACGACCAG	APBA1	461	415	723	323	669	140	475
GAGCCCTATGCCGACTACGG	APBA1_GAGCCCTATGCCGACTACGG	APBA1	407	317	792	187	637	39	767
TTCCATCGATCAAGTCTTCG	APBA1_TTCCATCGATCAAGTCTTCG	APBA1	458	557	367	451	535	609	998
CAGAGCTGGAGTCCCCATCG	APBA2_CAGAGCTGGAGTCCCCATCG	APBA2	651	614	770	638	726	354	38
CCAGGACTACTACCCCGAGG	APBA2_CCAGGACTACTACCCCGAGG	APBA2	0	104	228	127	253	14	321
GAACCAGAAGACCTCATCGA	APBA2_GAACCAGAAGACCTCATCGA	APBA2	283	429	319	366	205	2197	236
GAGGACGACAGCTACCTAGA	APBA2_GAGGACGACAGCTACCTAGA	APBA2	264	291	236	216	377	38	58
AGCTGGGCTACCTTATCCCA	APBB1_AGCTGGGCTACCTTATCCCA	APBB1	490	508	487	463	610	496	322
ATTGCGATTCTGGTCACGGT	APBB1_ATTGCGATTCTGGTCACGGT	APBB1	347	428	411	486	463	701	233
CCTGGGTTGGTATTCCGTGG	APBB1_CCTGGGTTGGTATTCCGTGG	APBB1	196	265	432	260	358	138	188
TGAGGGTCCAGGACACCTCA	APBB1_TGAGGGTCCAGGACACCTCA	APBB1	444	509	591	410	263	219	517
ACTGGGGTCCGGGTTAACAG	APBB2_ACTGGGGTCCGGGTTAACAG	APBB2	186	400	177	257	194	67	1569
AGAACCGAGGCAATCACCAT	APBB2_AGAACCGAGGCAATCACCAT	APBB2	444	396	455	271	209	138	1504
GCTGCGAGTGCAGCACGCTG	APBB2_GCTGCGAGTGCAGCACGCTG	APBB2	110	330	502	192	264	308	134
TGCACTAACTAACATCCAGG	APBB2_TGCACTAACTAACATCCAGG	APBB2	425	630	658	398	463	879	367
AGGATGTAATCAGACGACAC	APC_AGGATGTAATCAGACGACAC	APC	512	152	160	110	149	6	58
GGTTCAGAAACAAATCGAGT	APC_GGTTCAGAAACAAATCGAGT	APC	274	264	265	269	228	270	81
TCAATAGGCGTGTAATGATG	APC_TCAATAGGCGTGTAATGATG	APC	803	684	553	544	494	1476	524
TCTGTATAAATGGCTCATCG	APC_TCTGTATAAATGGCTCATCG	APC	160	34	119	57	136	86	25
ACTATAGGCTCGAAAACACA	APCS_ACTATAGGCTCGAAAACACA	APCS	1057	897	867	947	735	370	269
CTCCTACAATACCCAAGGCA	APCS_CTCCTACAATACCCAAGGCA	APCS	1452	918	1308	679	1023	333	277
GGAGAGTATAGTCTATACAT	APCS_GGAGAGTATAGTCTATACAT	APCS	496	199	387	273	637	136	62
GTGAAAAAGGGTCTGCGACA	APCS_GTGAAAAAGGGTCTGCGACA	APCS	1041	935	863	790	663	552	435
AGTTCGAAGACTCCGGCAGT	AIRE_AGTTCGAAGACTCCGGCAGT	AIRE	172	236	373	325	288	287	1009
CCCCGCTCACCGTTCCCGAG	AIRE_CCCCGCTCACCGTTCCCGAG	AIRE	1258	689	575	466	569	217	142
CGCGCTGGCTGACCACGACG	AIRE_CGCGCTGGCTGACCACGACG	AIRE	50	268	565	433	450	472	201
GTGGCGGTACCAAAGCCTTG	AIRE_GTGGCGGTACCAAAGCCTTG	AIRE	0	47	7	22	0	0	0
ATTATGTGGACCTCATCGGG	APEH_ATTATGTGGACCTCATCGGG	APEH	378	797	797	720	736	546	389
CACAACATCTACCACCACTG	APEH_CACAACATCTACCACCACTG	APEH	1061	670	645	537	786	453	516
GTACGGCGGCCAATACCGGA	APEH_GTACGGCGGCCAATACCGGA	APEH	560	937	785	852	832	977	417
TTTGCTGTGGACACCCAAGT	APEH_TTTGCTGTGGACACCCAAGT	APEH	584	783	719	768	739	512	336
ACAGCATATGTACCTAATGC	APEX1_ACAGCATATGTACCTAATGC	APEX1	241	63	87	237	202	41	0
ATGCCGTAAGAAACTTTGAG	APEX1_ATGCCGTAAGAAACTTTGAG	APEX1	232	169	134	278	258	41	81
CCAAGAGCAGATCTTGAGTG	APEX1_CCAAGAGCAGATCTTGAGTG	APEX1	1110	295	247	557	547	27	7
CTGGTCAGCTCCTTCGGACA	APEX1_CTGGTCAGCTCCTTCGGACA	APEX1	650	553	372	624	785	389	332
ATATTCAACTTTCCCCGCCG	BIRC2_ATATTCAACTTTCCCCGCCG	BIRC2	581	634	609	422	501	277	385
ATGCTATGTCAGAACACCGG	BIRC2_ATGCTATGTCAGAACACCGG	BIRC2	488	637	420	493	307	778	797
CAAGCTACTATGTTCCAAGG	BIRC2_CAAGCTACTATGTTCCAAGG	BIRC2	277	460	509	580	517	562	384
TACTCATTGCATAACTGTAG	BIRC2_TACTCATTGCATAACTGTAG	BIRC2	824	652	524	571	523	1218	58
ACCCGGAAGTAATGAGTGTG	BIRC3_ACCCGGAAGTAATGAGTGTG	BIRC3	1190	747	777	728	955	633	323
AGGATTAACTAGAACACTAG	BIRC3_AGGATTAACTAGAACACTAG	BIRC3	384	317	598	283	531	355	335
CATGGGTTCAACATGCCAAG	BIRC3_CATGGGTTCAACATGCCAAG	BIRC3	333	290	283	199	270	105	51
TTTCGTTATTCATTGCACAG	BIRC3_TTTCGTTATTCATTGCACAG	BIRC3	242	136	403	114	302	2	35
ATGACAACTAAAGCACCGCA	XIAP_ATGACAACTAAAGCACCGCA	XIAP	488	452	285	301	302	240	52
ATGGATATACTCAGTTAACA	XIAP_ATGGATATACTCAGTTAACA	XIAP	499	191	335	234	485	538	124
TATCAGACACCATATACCCG	XIAP_TATCAGACACCATATACCCG	XIAP	600	344	327	370	280	119	185
TCTGACCAGGCACGATCACA	XIAP_TCTGACCAGGCACGATCACA	XIAP	93	277	388	312	379	21	837
ATGCGGTGGTCCTTGAGAAA	BIRC5_ATGCGGTGGTCCTTGAGAAA	BIRC5	423	0	2	0	0	0	0
CAAGTCTGGCTCGTTCTCAG	BIRC5_CAAGTCTGGCTCGTTCTCAG	BIRC5	216	9	49	0	44	0	0
GAACATAAAAAGCATTCGTC	BIRC5_GAACATAAAAAGCATTCGTC	BIRC5	166	7	1	0	19	0	0
GCTGCGCCTGCACCCCGGAG	BIRC5_GCTGCGCCTGCACCCCGGAG	BIRC5	778	32	0	20	0	0	0
AATGTGAGAGTTCAACCCGG	APLP1_AATGTGAGAGTTCAACCCGG	APLP1	238	95	363	120	414	173	295
CCTGCCTAAAGCCGACAGAC	APLP1_CCTGCCTAAAGCCGACAGAC	APLP1	614	708	729	483	563	539	202
CGCACGCAGGTAGCGCCGCA	APLP1_CGCACGCAGGTAGCGCCGCA	APLP1	685	1121	706	924	726	1214	460
GGGAAATCAGTGAGCACGAG	APLP1_GGGAAATCAGTGAGCACGAG	APLP1	477	516	562	385	728	195	927
AAGGCCTGGAGAATGCGATG	APLP2_AAGGCCTGGAGAATGCGATG	APLP2	464	602	729	745	584	849	273
GCACCGCAACCGAATGGACA	APLP2_GCACCGCAACCGAATGGACA	APLP2	0	143	425	208	289	137	306
GGAACTGGTCTACCCCACAT	APLP2_GGAACTGGTCTACCCCACAT	APLP2	141	112	220	131	202	133	417
TATTGACAACTGGTGCCGGA	APLP2_TATTGACAACTGGTGCCGGA	APLP2	200	330	394	185	337	483	259
CAAGGCGGAGCCTTCAAACT	APOA1_CAAGGCGGAGCCTTCAAACT	APOA1	274	167	295	127	401	129	986
CCTAAAGCTCCTTGACAACT	APOA1_CCTAAAGCTCCTTGACAACT	APOA1	220	759	743	480	735	970	823
GAGCACATCCACGTACACAG	APOA1_GAGCACATCCACGTACACAG	APOA1	402	366	296	288	189	910	21
GCTGCGCGCAGAGCTCCAAG	APOA1_GCTGCGCGCAGAGCTCCAAG	APOA1	138	287	266	366	283	276	208
ACAGGCAAAGGAGCCATGTG	APOA2_ACAGGCAAAGGAGCCATGTG	APOA2	1128	1173	1602	1123	1075	707	934
CCCACCTTCAAGGCTGCAGA	APOA2_CCCACCTTCAAGGCTGCAGA	APOA2	680	547	524	471	428	359	499
GACCGTGACTGACTATGGCA	APOA2_GACCGTGACTGACTATGGCA	APOA2	590	830	553	576	621	929	164
TGTGGGCAGGAGCTTTGGTT	APOA2_TGTGGGCAGGAGCTTTGGTT	APOA2	687	470	308	409	346	243	241
CAAGATCGACCAGAACGTGG	APOA4_CAAGATCGACCAGAACGTGG	APOA4	1100	575	736	401	374	766	144
CAAGATTGACCAGACCGTGG	APOA4_CAAGATTGACCAGACCGTGG	APOA4	872	1036	826	832	773	231	281
GGAGAAGTGAACACTTACGC	APOA4_GGAGAAGTGAACACTTACGC	APOA4	369	522	644	540	618	996	356
TGAGGTGAGCCAGAAGATCG	APOA4_TGAGGTGAGCCAGAAGATCG	APOA4	937	1133	897	765	669	257	575
AAACTCACTTGTTGACCGCG	APOB_AAACTCACTTGTTGACCGCG	APOB	1407	1257	1301	1251	1115	442	932
AAGTCCATGAGTTAATCGAG	APOB_AAGTCCATGAGTTAATCGAG	APOB	571	974	939	916	860	620	681
GACATGACTTTCCGGCACGT	APOB_GACATGACTTTCCGGCACGT	APOB	1256	801	720	634	796	226	420
GGTCTCTACCACCAAAACGG	APOB_GGTCTCTACCACCAAAACGG	APOB	1204	607	1074	674	819	765	540
ATGGATCAACAAAATCGGCA	APOBEC1_ATGGATCAACAAAATCGGCA	APOBEC1	647	977	1078	917	739	653	623
CAAAAACACCACCAATCACG	APOBEC1_CAAAAACACCACCAATCACG	APOBEC1	841	845	796	977	787	1360	693
GAGTTTCTGAGTCGGCACCC	APOBEC1_GAGTTTCTGAGTCGGCACCC	APOBEC1	972	615	907	752	861	475	1041
TAGAAGACGTCAAACTCCCA	APOBEC1_TAGAAGACGTCAAACTCCCA	APOBEC1	710	316	433	418	473	54	368
CCTGTCGCTCCCGGTCCTGG	APOC1_CCTGTCGCTCCCGGTCCTGG	APOC1	1459	879	895	719	766	972	212
CTTCAGCTTATCCAAGGCAC	APOC1_CTTCAGCTTATCCAAGGCAC	APOC1	338	344	432	474	548	52	515
GTTCTGTCGATCGTCTTGGA	APOC1_GTTCTGTCGATCGTCTTGGA	APOC1	642	457	400	455	562	1355	319
TGGAAACACACTGGAGGACA	APOC1_TGGAAACACACTGGAGGACA	APOC1	256	629	891	483	752	110	154
CTGCTCCTGGACTGTCACAA	AQP8_CTGCTCCTGGACTGTCACAA	AQP8	808	1365	998	951	941	2247	465
GCTGTGAGACCCAGTACGGG	AQP8_GCTGTGAGACCCAGTACGGG	AQP8	800	545	647	418	676	95	354
GGCGAGTGTCCTGGTACGAA	AQP8_GGCGAGTGTCCTGGTACGAA	AQP8	535	664	572	631	536	532	184
GGCTCGTGATTGCCACGCTG	AQP8_GGCTCGTGATTGCCACGCTG	AQP8	1353	1112	975	757	831	1965	1175
ACTCACCAAATCCCAATACC	APOC2_ACTCACCAAATCCCAATACC	APOC2	206	235	305	146	118	509	31
GCAGGTATGTCTTCTCGTAC	APOC2_GCAGGTATGTCTTCTCGTAC	APOC2	785	411	482	356	600	643	425
GGAGAGAGATTCCTTCACCT	APOC2_GGAGAGAGATTCCTTCACCT	APOC2	610	207	176	254	169	168	107
GGAGGACAAGAAACAGAGCT	APOC2_GGAGGACAAGAAACAGAGCT	APOC2	110	164	185	120	137	1756	1
CACCAAGTGCTTACGGGCAG	APOC3_CACCAAGTGCTTACGGGCAG	APOC3	1778	1041	1519	1241	1264	214	1696
CTGCATGAAGCTGAGAAGGG	APOC3_CTGCATGAAGCTGAGAAGGG	APOC3	950	987	931	977	1210	281	359
GGATGCACTGAGCAGCGTGC	APOC3_GGATGCACTGAGCAGCGTGC	APOC3	922	1625	1448	1392	943	621	1100
TTTAGGGGCTGGGTGACCGA	APOC3_TTTAGGGGCTGGGTGACCGA	APOC3	703	1280	1559	1094	1165	501	1520
CAAAGCTAAAGATGAGTCGC	APOC4_CAAAGCTAAAGATGAGTCGC	APOC4	222	276	515	267	465	52	677
CCACCTAGCATGCCAGCCAG	APOC4_CCACCTAGCATGCCAGCCAG	APOC4	660	666	667	638	645	498	833
CCTCCTCAGAAACAGGCTCC	APOC4_CCTCCTCAGAAACAGGCTCC	APOC4	685	614	808	748	882	217	626
GTGGTGAACAGGACCAGAGA	APOC4_GTGGTGAACAGGACCAGAGA	APOC4	373	358	571	467	669	286	2674
AAAGATCAAAGTGTTAAACC	APOD_AAAGATCAAAGTGTTAAACC	APOD	583	220	659	320	447	109	509
AGGATCCAGTACGGTGCCGA	APOD_AGGATCCAGTACGGTGCCGA	APOD	190	419	350	393	397	261	115
CTCTGCAGTATCTCGGAAGA	APOD_CTCTGCAGTATCTCGGAAGA	APOD	199	238	417	255	268	86	317
GGAACTGTGAATCAAATCGA	APOD_GGAACTGTGAATCAAATCGA	APOD	295	155	156	90	256	62	153
AGCTGCGCCAGCAGACCGAG	APOE_AGCTGCGCCAGCAGACCGAG	APOE	459	656	709	543	952	240	1070
CATGCTCGGCCAGAGCACCG	APOE_CATGCTCGGCCAGAGCACCG	APOE	138	559	355	293	382	588	307
GCGGACATGGAGGACGTGTG	APOE_GCGGACATGGAGGACGTGTG	APOE	381	435	708	401	498	318	292
GGCCTACAAATCGGAACTGG	APOE_GGCCTACAAATCGGAACTGG	APOE	583	251	389	352	408	92	119
AAGCCGGGCTATGTGTCCCG	APOH_AAGCCGGGCTATGTGTCCCG	APOH	196	150	296	135	238	143	14
ACACGAAGTGTTGCAAACGT	APOH_ACACGAAGTGTTGCAAACGT	APOH	599	717	887	838	1005	1037	2328
TTCAAAAGTCGTATAGCGTA	APOH_TTCAAAAGTCGTATAGCGTA	APOH	414	186	170	178	187	215	369
TTCCCATCAAGACCAGACAA	APOH_TTCCCATCAAGACCAGACAA	APOH	441	260	326	356	307	90	6
ACATCCGCCGTAAAAGAATG	APP_ACATCCGCCGTAAAAGAATG	APP	549	1018	786	914	661	1690	411
CAAGTATCTCGAGACACCTG	APP_CAAGTATCTCGAGACACCTG	APP	63	429	335	332	285	1387	161
CGGAACTTGTCAATTCCGCA	APP_CGGAACTTGTCAATTCCGCA	APP	305	298	325	243	349	1274	224
GCTGCAGCGAGACCTACCCG	APP_GCTGCAGCGAGACCTACCCG	APP	435	450	487	345	450	196	27
CGCCTGCGATGTAGTCGATG	APRT_CGCCTGCGATGTAGTCGATG	APRT	1018	1080	872	950	830	1079	891
GCTGCGTGCTCATCCGAAAG	APRT_GCTGCGTGCTCATCCGAAAG	APRT	174	462	969	567	969	245	756
TCGCGCCAGGAGGCCGATGG	APRT_TCGCGCCAGGAGGCCGATGG	APRT	874	1124	1087	798	988	2027	1835
TCTTACCTTCCCGTACTCCA	APRT_TCTTACCTTCCCGTACTCCA	APRT	415	955	1016	782	950	625	299
AAAGCGTGATCTTGCTGGGT	KLK3_AAAGCGTGATCTTGCTGGGT	KLK3	1016	1206	1412	976	1246	958	639
ACAATCCGAGACAGGATGAG	KLK3_ACAATCCGAGACAGGATGAG	KLK3	1031	893	869	725	704	1953	779
AGGAGGCTCATATCGTAGAG	KLK3_AGGAGGCTCATATCGTAGAG	KLK3	1166	1310	1143	1291	998	1189	1177
TCTCGTGGCAGGGCAGTCTG	KLK3_TCTCGTGGCAGGGCAGTCTG	KLK3	0	0	0	0	0	0	0
ATGTGAACATGGAATCATCA	FAS_ATGTGAACATGGAATCATCA	FAS	1112	952	1344	751	1133	793	596
CAGGATCCAGATCTAACTTG	FAS_CAGGATCCAGATCTAACTTG	FAS	626	624	714	858	600	574	576
GTTGAGACTCAGAACTTGGA	FAS_GTTGAGACTCAGAACTTGGA	FAS	681	380	560	641	602	137	751
TAGGGACTGCACAGTCAATG	FAS_TAGGGACTGCACAGTCAATG	FAS	314	1257	1238	763	1155	400	667
AAAACATCACAAGGAGACAC	FASLG_AAAACATCACAAGGAGACAC	FASLG	383	285	192	289	246	422	40
AGAAAGCAGGACAATTCCAT	FASLG_AGAAAGCAGGACAATTCCAT	FASLG	158	264	369	489	478	164	13
GGAAGAGCTGAAACATCCCC	FASLG_GGAAGAGCTGAAACATCCCC	FASLG	155	149	369	178	305	447	1206
GGGAAGAACTGTGCCTGGAG	FASLG_GGGAAGAACTGTGCCTGGAG	FASLG	253	359	399	375	652	131	319
AGAGAACATCCTCTACACTG	SHROOM2_AGAGAACATCCTCTACACTG	SHROOM2	1710	1498	1329	1272	1180	693	2376
CCACCGTTCGACGCCCACGT	SHROOM2_CCACCGTTCGACGCCCACGT	SHROOM2	489	1143	1776	1009	1297	2565	1172
GGAGACCAGAGCTCACCGAT	SHROOM2_GGAGACCAGAGCTCACCGAT	SHROOM2	356	202	193	120	104	81	5
TCGAGATTATAGATACTCGG	SHROOM2_TCGAGATTATAGATACTCGG	SHROOM2	0	141	125	152	97	25	34
ACACCCCACTCACGTCATTG	AQP1_ACACCCCACTCACGTCATTG	AQP1	134	645	925	680	940	296	1819
ACTGGGCGATGATGTACATG	AQP1_ACTGGGCGATGATGTACATG	AQP1	162	658	487	529	603	497	180
CTGGGCTTCAAATACCCGGT	AQP1_CTGGGCTTCAAATACCCGGT	AQP1	308	381	289	336	263	894	36
GCGTGCTGGCTACTACCGAC	AQP1_GCGTGCTGGCTACTACCGAC	AQP1	289	397	270	206	278	355	451
CACGCCAGCAGACATCCGCG	AQP2_CACGCCAGCAGACATCCGCG	AQP2	475	290	275	289	282	63	152
CATGGCAATCTGTAGCACAG	AQP2_CATGGCAATCTGTAGCACAG	AQP2	348	306	142	304	137	112	219
GGCAGGCCACAGTCACGGCA	AQP2_GGCAGGCCACAGTCACGGCA	AQP2	526	851	731	538	768	87	718
TCTCCGAGCCGCCTTCTACG	AQP2_TCTCCGAGCCGCCTTCTACG	AQP2	0	0	0	0	0	0	0
CAAGCTGCCCATCTACACCC	AQP3_CAAGCTGCCCATCTACACCC	AQP3	859	1030	929	690	758	454	495
CAGCACACACACGATAAGGG	AQP3_CAGCACACACACGATAAGGG	AQP3	745	1100	961	711	810	1486	419
GATGGTGAGGAAACCACCGT	AQP3_GATGGTGAGGAAACCACCGT	AQP3	581	866	770	619	805	884	472
TACAACAACCCCGTCCCCCG	AQP3_TACAACAACCCCGTCCCCCG	AQP3	1032	1340	1099	904	1313	1203	1263
AAAGCCTTTACCGGTCGACA	AQP4_AAAGCCTTTACCGGTCGACA	AQP4	302	337	449	272	480	429	380
AACCAGGAGACCATGACCAG	AQP4_AACCAGGAGACCATGACCAG	AQP4	199	513	419	322	386	153	184
CAGTGCTTTGGCCATATCAG	AQP4_CAGTGCTTTGGCCATATCAG	AQP4	375	715	393	500	379	272	280
TGCGATGTAGAAGACAGACT	AQP4_TGCGATGTAGAAGACAGACT	AQP4	136	483	259	369	369	122	13
GACAGACAGGCCAATGGACA	AQP5_GACAGACAGGCCAATGGACA	AQP5	344	535	254	266	262	573	174
GCTCAACAACAACACAACGC	AQP5_GCTCAACAACAACACAACGC	AQP5	222	109	289	117	246	26	1429
GGCTGGCATCCTCTACGGTG	AQP5_GGCTGGCATCCTCTACGGTG	AQP5	241	158	102	71	103	122	26
GGTGCGGCGGGAGTCAGTGG	AQP5_GGTGCGGCGGGAGTCAGTGG	AQP5	251	65	352	159	284	155	48
AAAGAACACATACAGCCCCG	AQP6_AAAGAACACATACAGCCCCG	AQP6	494	301	145	290	160	116	6
ACCTACCACGTTGATCCCAA	AQP6_ACCTACCACGTTGATCCCAA	AQP6	387	526	504	522	484	520	483
ATGGCAATCTGTAGCACGGA	AQP6_ATGGCAATCTGTAGCACGGA	AQP6	149	258	613	324	509	176	355
GAGGAAGGCCAGCGTCACGG	AQP6_GAGGAAGGCCAGCGTCACGG	AQP6	72	119	345	72	205	21	36
ACACCCCGATGATGACCACG	AQP7_ACACCCCGATGATGACCACG	AQP7	373	397	196	530	233	1108	62
AGATCCAGGAAATACTGCAG	AQP7_AGATCCAGGAAATACTGCAG	AQP7	474	484	695	444	560	547	638
GCCCAGCGCACAGTTAGCAA	AQP7_GCCCAGCGCACAGTTAGCAA	AQP7	155	404	417	402	238	545	93
GTTCCTGGGCTCCTTCCTGG	AQP7_GTTCCTGGGCTCCTTCCTGG	AQP7	572	29	47	59	74	8	0
ATGGCCATTTATGTGGCTGG	AQP9_ATGGCCATTTATGTGGCTGG	AQP9	348	511	494	458	606	226	85
GACGGTTGCAGCCCCCACAA	AQP9_GACGGTTGCAGCCCCCACAA	AQP9	205	500	599	681	643	212	595
GATTATGAGGAGTATCATGG	AQP9_GATTATGAGGAGTATCATGG	AQP9	544	379	765	357	659	144	257
TGGTGGAAAACTGCTGATCG	AQP9_TGGTGGAAAACTGCTGATCG	AQP9	92	376	123	314	85	101	333
AGGGTACCACACATCAGGTG	AR_AGGGTACCACACATCAGGTG	AR	2171	1540	1275	1429	940	996	552
CCTTAAAGACATCCTGAGCG	AR_CCTTAAAGACATCCTGAGCG	AR	396	523	457	677	482	316	223
GGACGCAACCTCTCTCGGGG	AR_GGACGCAACCTCTCTCGGGG	AR	210	577	464	566	399	477	258
TCCAGCTTGATGCGAGCGTG	AR_TCCAGCTTGATGCGAGCGTG	AR	160	443	634	427	584	434	1404
ACTATGATCCAATCAGCCTG	ABCC6_ACTATGATCCAATCAGCCTG	ABCC6	736	806	1158	531	617	402	1643
CAGACCACGATCCAGACGAG	ABCC6_CAGACCACGATCCAGACGAG	ABCC6	327	248	223	208	213	529	180
GAGAACTGTGAGAGTCACAA	ABCC6_GAGAACTGTGAGAGTCACAA	ABCC6	303	223	337	228	341	220	30
GGACAGCATCCAATACGGCA	ABCC6_GGACAGCATCCAATACGGCA	ABCC6	324	522	361	421	225	470	248
AGTGTCCAGGATTTGTCCGG	ARAF_AGTGTCCAGGATTTGTCCGG	ARAF	419	697	490	548	359	890	2839
GCCCAACAAGCAACGCACGG	ARAF_GCCCAACAAGCAACGCACGG	ARAF	349	125	342	174	329	11	92
GTAGTGATGGAACCCCCCGG	ARAF_GTAGTGATGGAACCCCCCGG	ARAF	182	226	119	224	232	285	141
TGGTCTACCGACTCATCAAG	ARAF_TGGTCTACCGACTCATCAAG	ARAF	584	165	175	246	279	234	23
ACCATATACAGTTTCTCCAT	ARCN1_ACCATATACAGTTTCTCCAT	ARCN1	636	10	2	20	10	1	0
AGTACGCTTGCCCATACTAG	ARCN1_AGTACGCTTGCCCATACTAG	ARCN1	609	176	237	275	138	68	50
ATTCTAGACCCATCCAAATG	ARCN1_ATTCTAGACCCATCCAAATG	ARCN1	316	1	5	17	16	0	0
GATCCTATTTACCTCTCTGA	ARCN1_GATCCTATTTACCTCTCTGA	ARCN1	567	60	21	44	21	0	13
ACACACAGTGCAATATACAG	TRIM23_ACACACAGTGCAATATACAG	TRIM23	671	860	1061	904	878	546	293
GATCGACAAGTAACAGACCT	TRIM23_GATCGACAAGTAACAGACCT	TRIM23	1548	974	830	1092	1010	1189	1332
TGAAGGAGGAGAACAAATCG	TRIM23_TGAAGGAGGAGAACAAATCG	TRIM23	787	1016	805	594	774	665	283
TGCAGACACAGCACATGAGT	TRIM23_TGCAGACACAGCACATGAGT	TRIM23	1075	854	720	815	639	513	338
ATGCAAATATATAGAGCACC	AREG_ATGCAAATATATAGAGCACC	AREG	114	284	158	408	197	307	47
ATTGTCGATGATTCAGTCAG	AREG_ATTGTCGATGATTCAGTCAG	AREG	795	1172	1378	871	954	901	1677
GAGGACGGTTCACTACTAGA	AREG_GAGGACGGTTCACTACTAGA	AREG	403	330	349	224	269	31	111
TGGTTCACGCTTCCCAGAGT	AREG_TGGTTCACGCTTCCCAGAGT	AREG	228	293	274	159	300	204	500
AGGCTTCAACGTGGAAACCG	ARF1_AGGCTTCAACGTGGAAACCG	ARF1	404	337	259	206	492	229	73
CACCCAGCTTAAGCTTGTAG	ARF1_CACCCAGCTTAAGCTTGTAG	ARF1	794	72	20	258	98	56	73
TGACAGAGAGCGTGTGAACG	ARF1_TGACAGAGAGCGTGTGAACG	ARF1	199	216	112	115	86	168	163
TGGAAGTAGTGGCGCCACAG	ARF1_TGGAAGTAGTGGCGCCACAG	ARF1	625	56	68	227	121	22	82
AGAACATCAGCTTTACAGTG	ARF3_AGAACATCAGCTTTACAGTG	ARF3	988	1104	1450	1005	1043	1160	2666
CCTATACAAGCTGAAACTCG	ARF3_CCTATACAAGCTGAAACTCG	ARF3	209	396	503	280	360	105	477
GCTGTGCTCTTACCAATGGT	ARF3_GCTGTGCTCTTACCAATGGT	ARF3	585	429	303	327	354	246	479
TGGAAGTAGTGTCTCCAGAG	ARF3_TGGAAGTAGTGTCTCCAGAG	ARF3	552	551	473	487	590	85	518
ACTTCCAGAATACCCAGGTA	ARF4_ACTTCCAGAATACCCAGGTA	ARF4	405	84	200	122	239	14	24
TAAACTTTCTTACCAATGGT	ARF4_TAAACTTTCTTACCAATGGT	ARF4	121	103	60	227	108	33	9
TCAATTCATCTACCAGAAGC	ARF4_TCAATTCATCTACCAGAAGC	ARF4	409	196	246	177	124	11	89
TCTGCTTCTTGCCAAATAGT	ARF4_TCTGCTTCTTGCCAAATAGT	ARF4	458	131	250	55	260	34	366
AGACGGTCTAGTGTTTGTGG	ARL4D_AGACGGTCTAGTGTTTGTGG	ARL4D	103	4	33	9	41	0	0
AGCCGGGCCTCGGACAACCA	ARL4D_AGCCGGGCCTCGGACAACCA	ARL4D	1156	956	872	734	889	590	496
CGGGTATAAGAGCGCCACAG	ARL4D_CGGGTATAAGAGCGCCACAG	ARL4D	574	425	359	246	441	246	190
TGATGCCACGCGATCCCCCG	ARL4D_TGATGCCACGCGATCCCCCG	ARL4D	932	726	866	821	706	320	2119
AAGCAGATGCGGATTCTCAT	ARF5_AAGCAGATGCGGATTCTCAT	ARF5	92	174	422	280	270	35	909
GTCACCACCATCCCAACCAT	ARF5_GTCACCACCATCCCAACCAT	ARF5	69	544	685	388	737	258	646
TGCTGATGAACTCCAGAAGA	ARF5_TGCTGATGAACTCCAGAAGA	ARF5	22	249	360	307	356	152	331
TGTGGTGGACAGTAATGACC	ARF5_TGTGGTGGACAGTAATGACC	ARF5	184	99	195	47	85	22	1112
CCAAGGTCTCATCTTCGTAG	ARF6_CCAAGGTCTCATCTTCGTAG	ARF6	925	240	388	211	318	246	415
CCTGGCGAGCCTCATCGATG	ARF6_CCTGGCGAGCCTCATCGATG	ARF6	351	568	373	370	523	1379	133
GAAACCCACAGTGGGAATGG	ARF6_GAAACCCACAGTGGGAATGG	ARF6	169	158	176	173	144	85	77
GTGTAGTAATGCCGCCAGAG	ARF6_GTGTAGTAATGCCGCCAGAG	ARF6	183	235	237	216	313	471	196
ACTCCACTGACAACCACAAG	ARG1_ACTCCACTGACAACCACAAG	ARG1	0	236	253	195	247	158	66
AGATATACAGGGAGTCACCC	ARG1_AGATATACAGGGAGTCACCC	ARG1	569	521	926	655	626	330	1064
AGGCCCTACAGTATTGAGAA	ARG1_AGGCCCTACAGTATTGAGAA	ARG1	127	285	269	218	208	14	373
GGACAGACTAGGAATTGGCA	ARG1_GGACAGACTAGGAATTGGCA	ARG1	186	530	525	507	354	474	124
GATAGTGAATCCACGCTCAG	ARG2_GATAGTGAATCCACGCTCAG	ARG2	160	368	255	363	215	176	13
TAGGAGCCCCGTTCTCACAA	ARG2_TAGGAGCCCCGTTCTCACAA	ARG2	384	738	778	711	670	462	317
TCATAGGTACCACAACTCCC	ARG2_TCATAGGTACCACAACTCCC	ARG2	226	420	314	216	217	45	88
TGATCGACTTGGTATCCAGA	ARG2_TGATCGACTTGGTATCCAGA	ARG2	91	287	328	316	272	311	83
AAAACACATCAGTATAACAT	RHOA_AAAACACATCAGTATAACAT	RHOA	81	84	35	130	221	1	0
ACAGAAATGCTTGACTTCTG	RHOA_ACAGAAATGCTTGACTTCTG	RHOA	836	89	175	251	204	4	2
CTATGTGGCAGATATCGAGG	RHOA_CTATGTGGCAGATATCGAGG	RHOA	381	13	58	26	154	18	298
GCCACTCACCTAAACTATCA	RHOA_GCCACTCACCTAAACTATCA	RHOA	149	50	91	74	178	115	435
CGGTGGGCACGTACACCTCG	RHOB_CGGTGGGCACGTACACCTCG	RHOB	0	241	304	234	218	173	322
CTTGCCGTCCACCTCAATGT	RHOB_CTTGCCGTCCACCTCAATGT	RHOB	317	668	323	446	286	2316	282
GAAGCACATGAGAATGACGT	RHOB_GAAGCACATGAGAATGACGT	RHOB	508	362	340	288	435	577	233
GGGACAGAAGTGCTTCACCT	RHOB_GGGACAGAAGTGCTTCACCT	RHOB	469	530	517	327	419	983	144
AAAGAAGCTGGTGATCGTTG	RHOC_AAAGAAGCTGGTGATCGTTG	RHOC	362	933	676	607	461	167	552
AGGAAGACTATGATCGACTG	RHOC_AGGAAGACTATGATCGACTG	RHOC	250	512	334	446	415	510	103
CAGCAAGGATCAGTTTCCGG	RHOC_CAGCAAGGATCAGTTTCCGG	RHOC	676	468	497	426	460	189	226
TGGGGAATAAGAAGGACCTG	RHOC_TGGGGAATAAGAAGGACCTG	RHOC	489	189	244	217	346	40	35
AAATGCAAGATAGTTGTGGT	RND3_AAATGCAAGATAGTTGTGGT	RND3	861	885	667	954	771	3054	429
GACGCCAGTGTCCTATGACC	RND3_GACGCCAGTGTCCTATGACC	RND3	453	770	450	581	345	744	141
TCAGCACAGCATCCGAATCA	RND3_TCAGCACAGCATCCGAATCA	RND3	504	746	1013	703	1023	1098	319
TCTTACCCGAAGTGTCCCAC	RND3_TCTTACCCGAAGTGTCCCAC	RND3	569	692	719	637	442	1575	335
CCTGAACCTGTGGGACACTG	RHOG_CCTGAACCTGTGGGACACTG	RHOG	678	685	365	648	592	334	21
CGCCGTCCTATGAGAACGTG	RHOG_CGCCGTCCTATGAGAACGTG	RHOG	567	366	432	298	561	116	663
GAAACAGATGACGAAAACGT	RHOG_GAAACAGATGACGAAAACGT	RHOG	327	158	133	130	90	0	22
GCTGTAATTGTCGAACACGG	RHOG_GCTGTAATTGTCGAACACGG	RHOG	119	66	100	48	251	0	3
CAGGTGTGTGACAAGTTCCG	ARHGAP1_CAGGTGTGTGACAAGTTCCG	ARHGAP1	215	206	340	66	230	9	93
CCTCGCCAAGTGCTCAAGTG	ARHGAP1_CCTCGCCAAGTGCTCAAGTG	ARHGAP1	107	357	399	429	460	352	66
CTTGCGGTCAAACTCCCGGT	ARHGAP1_CTTGCGGTCAAACTCCCGGT	ARHGAP1	173	262	399	291	441	41	409
TAGGAGATGACAAGTATGGG	ARHGAP1_TAGGAGATGACAAGTATGGG	ARHGAP1	447	611	574	526	560	384	230
CGAAACCTTCTACCTCACGG	ARHGAP4_CGAAACCTTCTACCTCACGG	ARHGAP4	754	683	938	335	879	1479	1173
GCACAAACTCAAGTGCACAA	ARHGAP4_GCACAAACTCAAGTGCACAA	ARHGAP4	388	286	421	218	360	201	291
TATAACCAGAGACTCTTTGG	ARHGAP4_TATAACCAGAGACTCTTTGG	ARHGAP4	424	430	280	342	350	281	48
TCTGCGTTGAAATGGAGCTG	ARHGAP4_TCTGCGTTGAAATGGAGCTG	ARHGAP4	1084	753	868	611	697	1276	161
ACTAAATGGATCTCCACACA	ARHGAP5_ACTAAATGGATCTCCACACA	ARHGAP5	0	468	357	305	164	2734	547
GCACCCATGTGGTTTAAAGG	ARHGAP5_GCACCCATGTGGTTTAAAGG	ARHGAP5	221	97	182	105	209	581	103
TCAGTATCATCGGCAAACTG	ARHGAP5_TCAGTATCATCGGCAAACTG	ARHGAP5	833	1499	1218	901	826	1077	910
TGCAAATTCGTACTCCGATG	ARHGAP5_TGCAAATTCGTACTCCGATG	ARHGAP5	56	537	270	356	169	683	99
AGGGCCACCTACCATGAACA	ARHGAP6_AGGGCCACCTACCATGAACA	ARHGAP6	856	1830	1445	1368	1203	1156	736
CGGATTTCCACACGACGTAG	ARHGAP6_CGGATTTCCACACGACGTAG	ARHGAP6	651	754	961	614	722	450	926
GAGGTTCCCCTGGGTCGCGG	ARHGAP6_GAGGTTCCCCTGGGTCGCGG	ARHGAP6	825	1388	1621	1010	1287	611	2161
TACGTGAGGAATTTGACCGT	ARHGAP6_TACGTGAGGAATTTGACCGT	ARHGAP6	638	876	806	655	911	760	724
AGTACATCCAGCATACGTAC	ARHGDIA_AGTACATCCAGCATACGTAC	ARHGDIA	686	451	555	632	787	40	18
CACCTGCGGAAACGGCCACG	ARHGDIA_CACCTGCGGAAACGGCCACG	ARHGDIA	233	324	321	360	204	127	312
CAGGCCAGTCACCACGACGT	ARHGDIA_CAGGCCAGTCACCACGACGT	ARHGDIA	134	30	131	80	155	0	49
TCATGCCGGACACTATCTCT	ARHGDIA_TCATGCCGGACACTATCTCT	ARHGDIA	336	153	265	109	391	5	5
AAGTACAAGAAAACGCTGCT	ARHGDIB_AAGTACAAGAAAACGCTGCT	ARHGDIB	999	1594	1569	1632	1275	806	536
CCGGGTGACAACGACATTGG	ARHGDIB_CCGGGTGACAACGACATTGG	ARHGDIB	410	946	1090	816	921	570	570
TCAGCACACCTACAGGACTG	ARHGDIB_TCAGCACACCTACAGGACTG	ARHGDIB	648	841	1165	770	859	130	904
TGCCCCGGGACCAATCACCA	ARHGDIB_TGCCCCGGGACCAATCACCA	ARHGDIB	754	428	657	291	611	184	435
ACCTGTGAGATCCATGACGA	ARHGDIG_ACCTGTGAGATCCATGACGA	ARHGDIG	296	572	348	444	401	746	579
GGAGCCTGGCCAAGTACAAG	ARHGDIG_GGAGCCTGGCCAAGTACAAG	ARHGDIG	259	249	590	206	550	347	338
GGCCGCTGACAATCTCCCTG	ARHGDIG_GGCCGCTGACAATCTCCCTG	ARHGDIG	508	406	426	391	517	159	158
TCCAACACCTCGTCCACTGC	ARHGDIG_TCCAACACCTCGTCCACTGC	ARHGDIG	615	521	579	549	458	132	212
AGTGTACGAGAACACAGGGG	RHOH_AGTGTACGAGAACACAGGGG	RHOH	286	707	626	553	573	311	452
GGTGAAGCGCACCAACAGAG	RHOH_GGTGAAGCGCACCAACAGAG	RHOH	648	595	455	346	334	264	383
GTTCAGGAATGAGTTATGGT	RHOH_GTTCAGGAATGAGTTATGGT	RHOH	201	379	416	330	438	348	133
TGGCCACCCAGACTGACCAG	RHOH_TGGCCACCCAGACTGACCAG	RHOH	570	1087	1090	1111	949	558	881
AGAGTTAGTTGCCATGTTGG	ARL1_AGAGTTAGTTGCCATGTTGG	ARL1	978	905	755	1028	667	813	143
GAATAGTAACATCTCCAGTA	ARL1_GAATAGTAACATCTCCAGTA	ARL1	339	511	529	436	617	624	755
TTCCCGAGTTCCAAACAGAC	ARL1_TTCCCGAGTTCCAAACAGAC	ARL1	427	489	595	761	451	308	562
TTGTAATCTGTACAAAATTG	ARL1_TTGTAATCTGTACAAAATTG	ARL1	393	356	461	376	317	120	173
AGGCGGTGCTATCGGGCGTG	PHOX2A_AGGCGGTGCTATCGGGCGTG	PHOX2A	836	919	963	740	691	806	338
CCCCGACATTTACACGCGTG	PHOX2A_CCCCGACATTTACACGCGTG	PHOX2A	717	535	1210	420	826	168	576
GCTTCCAATACAGCCCCCTG	PHOX2A_GCTTCCAATACAGCCCCCTG	PHOX2A	437	404	600	447	618	522	438
GGCGCCAAAGTCGCCGTAGG	PHOX2A_GGCGCCAAAGTCGCCGTAGG	PHOX2A	987	846	764	667	843	897	168
AACTACTTTGAGAGCACCGA	ARL2_AACTACTTTGAGAGCACCGA	ARL2	315	2	6	0	13	0	0
CATCCTGAAGAAGTTCAATG	ARL2_CATCCTGAAGAAGTTCAATG	ARL2	465	0	35	0	8	0	0
GATGTTGAAGCCCAGCGTTG	ARL2_GATGTTGAAGCCCAGCGTTG	ARL2	84	42	0	50	0	0	0
GTTCCGCCAGTAGGACCGCA	ARL2_GTTCCGCCAGTAGGACCGCA	ARL2	916	1	35	89	66	0	2
ATCAAAAGTGTACAATCACA	ARL3_ATCAAAAGTGTACAATCACA	ARL3	224	320	191	364	277	411	29
CAGCCACATCACACCTACAC	ARL3_CAGCCACATCACACCTACAC	ARL3	663	331	421	317	595	13	148
CTGAATGTATGGGACATTGG	ARL3_CTGAATGTATGGGACATTGG	ARL3	119	197	216	263	403	75	28
GGAACTAGCGGAATTACTGG	ARL3_GGAACTAGCGGAATTACTGG	ARL3	101	237	290	286	368	144	112
AGATGTCTAACGATAAGGAG	ARNT_AGATGTCTAACGATAAGGAG	ARNT	97	342	276	283	155	697	228
CAAGCTAACCATCTTACGCA	ARNT_CAAGCTAACCATCTTACGCA	ARNT	404	495	201	352	290	2292	203
TGGATTGTGTTGGAGAGTGT	ARNT_TGGATTGTGTTGGAGAGTGT	ARNT	231	210	172	248	218	80	62
TGGGGAACCTCACTTCGTGG	ARNT_TGGGGAACCTCACTTCGTGG	ARNT	86	135	189	187	274	8	78
CTGGACATTGCGTTGCATGT	ARNTL_CTGGACATTGCGTTGCATGT	ARNTL	845	1059	882	991	998	2335	531
GCAGTCGTCCAATTGCGACG	ARNTL_GCAGTCGTCCAATTGCGACG	ARNTL	522	585	604	419	634	123	253
TTAAAACAGATATAACCCCT	ARNTL_TTAAAACAGATATAACCCCT	ARNTL	466	272	336	316	326	69	95
TTAGAATATACAGAACACCA	ARNTL_TTAGAATATACAGAACACCA	ARNTL	495	460	370	378	397	846	363
ACTTCAAAGTCAATCCCACA	ARR3_ACTTCAAAGTCAATCCCACA	ARR3	1583	1321	783	1009	724	2441	524
CTCTGCTCAGAGACTATGTG	ARR3_CTCTGCTCAGAGACTATGTG	ARR3	582	730	686	877	786	673	388
GCGACTACTGCACAAGCTAG	ARR3_GCGACTACTGCACAAGCTAG	ARR3	306	371	384	325	453	306	141
TTAAGTACTCAGGATCAACC	ARR3_TTAAGTACTCAGGATCAACC	ARR3	653	517	588	556	496	102	155
AGGTTCAGTATGCCCCAGAG	ARRB1_AGGTTCAGTATGCCCCAGAG	ARRB1	394	680	583	519	563	731	160
CGGTGGGAACGACTGTACGT	ARRB1_CGGTGGGAACGACTGTACGT	ARRB1	424	414	273	536	343	313	201
TCCTACCTCCTTATCCAGAG	ARRB1_TCCTACCTCCTTATCCAGAG	ARRB1	50	250	432	209	236	258	338
TGAAGTCAAAGCCTTCTGCG	ARRB1_TGAAGTCAAAGCCTTCTGCG	ARRB1	699	229	576	356	536	201	648
CACAGGACACTTGTACTGGG	ARRB2_CACAGGACACTTGTACTGGG	ARRB2	237	291	388	403	271	443	190
CCAAAAGCTGTACTACCATG	ARRB2_CCAAAAGCTGTACTACCATG	ARRB2	79	272	228	316	152	351	170
CTGGACAAAGTGGACCCTGT	ARRB2_CTGGACAAAGTGGACCCTGT	ARRB2	591	307	704	276	596	126	808
TGTGCGGCTGGTGATCCGAA	ARRB2_TGTGCGGCTGGTGATCCGAA	ARRB2	130	146	265	121	172	243	111
ACGGGATGCCTAGAAATCGA	ARSA_ACGGGATGCCTAGAAATCGA	ARSA	503	676	590	419	672	2174	212
TGCCGACGACCTCGGCTATG	ARSA_TGCCGACGACCTCGGCTATG	ARSA	1011	1178	1308	1087	1231	321	481
TGGAAAGGGAACGACCTACG	ARSA_TGGAAAGGGAACGACCTACG	ARSA	374	469	312	444	245	126	189
TTACGTGAGAGGCATAGTAC	ARSA_TTACGTGAGAGGCATAGTAC	ARSA	529	838	444	581	391	718	721
ATGGCTTCAAGTATTCCTCA	ARSB_ATGGCTTCAAGTATTCCTCA	ARSB	708	948	1194	847	1086	492	1480
GACCTAGGCTGGAACGACGT	ARSB_GACCTAGGCTGGAACGACGT	ARSB	564	583	595	338	600	880	59
GTAGGTATCAAATCCTCGGC	ARSB_GTAGGTATCAAATCCTCGGC	ARSB	490	398	294	443	286	413	299
TACTGTGTTTCAGATAACGG	ARSB_TACTGTGTTTCAGATAACGG	ARSB	164	454	476	426	328	228	214
AAGTCAACACGGAGTCTACG	STS_AAGTCAACACGGAGTCTACG	STS	315	978	1027	750	765	432	646
GAGAGACTGCAAGCCCGGAG	STS_GAGAGACTGCAAGCCCGGAG	STS	448	994	1106	1037	1021	1117	1483
GGAGGTTACCTGATCGGACA	STS_GGAGGTTACCTGATCGGACA	STS	838	1274	1225	1052	931	997	1457
TCTCACCCAGAGGCTAACGG	STS_TCTCACCCAGAGGCTAACGG	STS	0	0	0	0	0	0	0
AGATGGACACAGCCAGTTAG	ARSD_AGATGGACACAGCCAGTTAG	ARSD	315	434	861	313	802	164	995
GACATTCCTTCAGATCAGGT	ARSD_GACATTCCTTCAGATCAGGT	ARSD	535	533	670	595	625	318	986
TGGCTTATATGGTGATAATG	ARSD_TGGCTTATATGGTGATAATG	ARSD	431	277	311	189	302	164	159
TGTGAATTGTGCATCCCGCG	ARSD_TGTGAATTGTGCATCCCGCG	ARSD	38	325	431	245	232	58	186
CAAAATAGGAGCTTGCGAGG	ARSE_CAAAATAGGAGCTTGCGAGG	ARSE	141	115	194	299	182	79	44
GAGACTGACCTGATCGCACA	ARSE_GAGACTGACCTGATCGCACA	ARSE	1005	1825	1231	1234	1269	1364	668
GCTGTATGGGGACAACGTAG	ARSE_GCTGTATGGGGACAACGTAG	ARSE	91	137	310	153	174	176	156
GGTTCCCTAGAGAATCAACT	ARSE_GGTTCCCTAGAGAATCAACT	ARSE	343	488	416	312	529	396	248
CTAATTCCGTGTTACGAGAG	ARSF_CTAATTCCGTGTTACGAGAG	ARSF	472	670	828	625	787	150	395
GATCTGATGTAAAGTAGACA	ARSF_GATCTGATGTAAAGTAGACA	ARSF	792	627	691	536	749	1553	55
GCACACACCTCTCCCCACCA	ARSF_GCACACACCTCTCCCCACCA	ARSF	1711	1030	1155	1308	880	744	1583
GTATCTTCCCGTCAAGAACG	ARSF_GTATCTTCCCGTCAAGAACG	ARSF	360	1045	913	773	777	768	379
AGAGGTCTCGTCGTGTGATG	ART1_AGAGGTCTCGTCGTGTGATG	ART1	668	334	826	202	706	451	284
GCCAGCGTACTGGTCATCAA	ART1_GCCAGCGTACTGGTCATCAA	ART1	523	318	206	202	247	94	35
GGCTGCAACATGCTTCAGGG	ART1_GGCTGCAACATGCTTCAGGG	ART1	54	257	443	230	411	538	14
TCTCCCGGATCTCAACCACA	ART1_TCTCCCGGATCTCAACCACA	ART1	0	0	2	0	8	0	10
AATACCTGAAATGTACGGAC	ART3_AATACCTGAAATGTACGGAC	ART3	124	543	581	507	483	490	528
AGATGGATAACACAGTGAGC	ART3_AGATGGATAACACAGTGAGC	ART3	280	571	457	383	433	950	247
CCAGCAATTAGATACTGTGT	ART3_CCAGCAATTAGATACTGTGT	ART3	394	209	535	246	406	362	1897
GTTGCTGAGAAAACCTTGTG	ART3_GTTGCTGAGAAAACCTTGTG	ART3	239	260	495	320	397	1082	95
AATGAACGTTCATACTGCTG	ART4_AATGAACGTTCATACTGCTG	ART4	885	541	486	449	461	323	34
CATGACTACCACACACGCTG	ART4_CATGACTACCACACACGCTG	ART4	338	576	590	357	365	757	493
TATGGAGAAACTAACTCAAG	ART4_TATGGAGAAACTAACTCAAG	ART4	82	118	186	130	217	8	83
TGAGGTGCATTATAGGACGA	ART4_TGAGGTGCATTATAGGACGA	ART4	89	229	241	95	138	184	245
AAGATGGTCATCATTGACCA	ARVCF_AAGATGGTCATCATTGACCA	ARVCF	387	755	671	765	588	1077	381
CACCTGGCGTACTGTCCGAG	ARVCF_CACCTGGCGTACTGTCCGAG	ARVCF	985	1109	641	877	689	1062	372
CGGCCGCATTGGCCTTCACG	ARVCF_CGGCCGCATTGGCCTTCACG	ARVCF	0	313	154	400	171	287	58
GTCACTAGGCTGTTACCTGG	ARVCF_GTCACTAGGCTGTTACCTGG	ARVCF	358	647	840	522	736	564	386
ATAAATACATTCGTGCCAAG	ASAH1_ATAAATACATTCGTGCCAAG	ASAH1	139	448	638	541	670	800	289
GAACGTTTCAGTATAAATGG	ASAH1_GAACGTTTCAGTATAAATGG	ASAH1	659	511	772	450	808	2772	891
TAAAGGTATATCAGTAACAG	ASAH1_TAAAGGTATATCAGTAACAG	ASAH1	264	254	276	314	316	311	102
TTTGCTGTGAAAGCCCAAGT	ASAH1_TTTGCTGTGAAAGCCCAAGT	ASAH1	380	298	545	237	489	206	287
AAACGCCGGCTCAACTTCAG	ASCL1_AAACGCCGGCTCAACTTCAG	ASCL1	1877	1584	1846	1675	1580	2453	836
CCAGGTTGACCAACTTGACG	ASCL1_CCAGGTTGACCAACTTGACG	ASCL1	411	1171	899	989	632	1639	1091
GCAAAGAAACAGGCTGCGGG	ASCL1_GCAAAGAAACAGGCTGCGGG	ASCL1	109	188	355	199	200	463	298
TCTTGTTGGCCGCGCCGTTG	ASCL1_TCTTGTTGGCCGCGCCGTTG	ASCL1	544	221	359	286	377	164	330
CAGCGCGCGGATGTACTCCA	ASCL2_CAGCGCGCGGATGTACTCCA	ASCL2	578	381	382	269	319	141	1656
CCGGCCACCGCAGAGACCGG	ASCL2_CCGGCCACCGCAGAGACCGG	ASCL2	545	458	560	281	500	685	4356
CGCAACAGTTCCGGGGACGC	ASCL2_CGCAACAGTTCCGGGGACGC	ASCL2	979	676	678	426	674	207	129
CGGCAGCACGTGCCGCACGG	ASCL2_CGGCAGCACGTGCCGCACGG	ASCL2	244	847	787	466	432	1334	397
CAGACACGAACTGCTTCACG	ASGR1_CAGACACGAACTGCTTCACG	ASGR1	1040	1053	1024	924	880	518	751
CCATCAGCTCAGAAAAGGTG	ASGR1_CCATCAGCTCAGAAAAGGTG	ASGR1	855	1008	1118	741	1146	417	719
GAAGTCGCTAGAGTCCCAGC	ASGR1_GAAGTCGCTAGAGTCCCAGC	ASGR1	766	1325	1501	990	1229	2592	202
GTGTGATCGGATCCCAAAGT	ASGR1_GTGTGATCGGATCCCAAAGT	ASGR1	841	1068	922	824	1134	236	624
CTCCTCGAGCACCCTGACGG	ASGR2_CTCCTCGAGCACCCTGACGG	ASGR2	293	346	590	209	296	86	151
GGTGACAAGATCACATCCCT	ASGR2_GGTGACAAGATCACATCCCT	ASGR2	849	571	681	614	487	672	553
GTCAACTGGGTGGAGCACCA	ASGR2_GTCAACTGGGTGGAGCACCA	ASGR2	685	251	215	242	248	364	53
GTGCTTCAGATGGAAGAGCA	ASGR2_GTGCTTCAGATGGAAGAGCA	ASGR2	129	438	493	289	374	588	350
AACAAGAAATCCAAACAGAT	ASIP_AACAAGAAATCCAAACAGAT	ASIP	395	440	489	542	473	1504	69
GACATCCAGTAGGTTCACAG	ASIP_GACATCCAGTAGGTTCACAG	ASIP	901	554	778	652	802	781	655
TCTCGGAGCTTCTCCTCAGG	ASIP_TCTCGGAGCTTCTCCTCAGG	ASIP	0	8	66	0	59	0	11
TTACCCACAATAGAGACAGA	ASIP_TTACCCACAATAGAGACAGA	ASIP	464	761	452	539	639	588	164
CAAACTGAACTCCAATGATG	ASL_CAAACTGAACTCCAATGATG	ASL	611	845	820	927	615	819	1103
CACAAAGTCCCGCTCACTAG	ASL_CACAAAGTCCCGCTCACTAG	ASL	435	466	334	406	258	1112	612
CTACGACCGGCACCTTTGGG	ASL_CTACGACCGGCACCTTTGGG	ASL	251	177	244	200	240	61	53
TCCTAATGAGCTCCCAGAGG	ASL_TCCTAATGAGCTCCCAGAGG	ASL	286	145	224	78	214	57	69
ACCTCACGGCGTCTGCCAGG	ASMT_ACCTCACGGCGTCTGCCAGG	ASMT	563	1395	1650	1034	1539	1663	1522
CTCCTTAATGACTACGCCAA	ASMT_CTCCTTAATGACTACGCCAA	ASMT	339	467	770	383	488	163	228
GTCCAGCGACTACCTGACCA	ASMT_GTCCAGCGACTACCTGACCA	ASMT	649	625	725	415	822	180	335
TGGGAACACTGACAGGTCAA	ASMT_TGGGAACACTGACAGGTCAA	ASMT	513	560	529	567	575	232	436
CGCATTTCCCGGCATCGATG	ASNA1_CGCATTTCCCGGCATCGATG	ASNA1	522	190	72	161	234	0	3
CTGAAGTGGATCTTCGTCGG	ASNA1_CTGAAGTGGATCTTCGTCGG	ASNA1	253	0	17	194	132	2	5
GCCTGACGAGTTCTTCGAGG	ASNA1_GCCTGACGAGTTCTTCGAGG	ASNA1	575	165	347	107	226	275	217
TTCCCCACCATCGTGGAGCG	ASNA1_TTCCCCACCATCGTGGAGCG	ASNA1	784	79	113	271	374	3	119
AACGTTTGATGACAGACAGA	ASNS_AACGTTTGATGACAGACAGA	ASNS	503	818	644	564	591	1441	760
CTCCATATGTATCTCTACCC	ASNS_CTCCATATGTATCTCTACCC	ASNS	421	323	293	233	212	30	116
TTCTAGCAGCCAGTAAATCG	ASNS_TTCTAGCAGCCAGTAAATCG	ASNS	557	176	420	264	315	435	301
TTGTCATAGAGGGCGTGCAG	ASNS_TTGTCATAGAGGGCGTGCAG	ASNS	429	924	978	622	610	2171	195
ACAACACCACCTCTAACATG	ASPA_ACAACACCACCTCTAACATG	ASPA	849	733	1156	756	839	302	655
ATTTGCCATATGAAGTGAGA	ASPA_ATTTGCCATATGAAGTGAGA	ASPA	1122	1345	982	1426	1219	452	1631
GAGGACCAACTTCTATACCT	ASPA_GAGGACCAACTTCTATACCT	ASPA	570	518	270	326	184	593	152
GAGTATTTCTGGTTAAGCAT	ASPA_GAGTATTTCTGGTTAAGCAT	ASPA	600	506	540	699	646	384	121
AACCGAGCATAGTTACCACG	ASPH_AACCGAGCATAGTTACCACG	ASPH	742	1434	1301	1149	1389	1195	634
AGAAGTAATGAGGTGCTACG	ASPH_AGAAGTAATGAGGTGCTACG	ASPH	726	923	1192	676	541	1075	624
TCAAGAGGTATCCCACGCCA	ASPH_TCAAGAGGTATCCCACGCCA	ASPH	885	627	818	708	896	1196	275
TCTACAGGATTATCCTCAGG	ASPH_TCTACAGGATTATCCTCAGG	ASPH	266	230	185	222	221	154	562
ACACCTCGTGCATCCTCGTG	ASS1_ACACCTCGTGCATCCTCGTG	ASS1	574	250	209	359	347	21	45
ACATCCTACCTTTATCTGGG	ASS1_ACATCCTACCTTTATCTGGG	ASS1	607	827	1078	844	806	1250	924
TGACCTGATGGAGTACGCAA	ASS1_TGACCTGATGGAGTACGCAA	ASS1	487	833	660	812	658	1106	472
TGGAATCCTGGAGAACCCCA	ASS1_TGGAATCCTGGAGAACCCCA	ASS1	473	563	568	425	507	1278	300
AGGGCTGCAATGAAAAGTCG	ASTN1_AGGGCTGCAATGAAAAGTCG	ASTN1	929	956	1020	816	993	669	2333
CCTTACACAATATTTCAGCG	ASTN1_CCTTACACAATATTTCAGCG	ASTN1	627	305	469	542	510	343	435
TGACGTGAGAGGAGCACACG	ASTN1_TGACGTGAGAGGAGCACACG	ASTN1	605	974	914	727	692	965	463
TGATGATCCTGTATACTCGC	ASTN1_TGATGATCCTGTATACTCGC	ASTN1	342	676	566	401	365	1297	571
CAAGTTCCGTTATCGGCGCG	SERPINC1_CAAGTTCCGTTATCGGCGCG	SERPINC1	606	479	187	373	154	1383	15
CAGTTCCCAGACACGCCGGT	SERPINC1_CAGTTCCCAGACACGCCGGT	SERPINC1	355	302	403	296	322	89	235
GGCTTCCGAGGGAATGACAT	SERPINC1_GGCTTCCGAGGGAATGACAT	SERPINC1	248	167	429	156	379	825	235
GGGGAGCGGTAAATGCACAT	SERPINC1_GGGGAGCGGTAAATGCACAT	SERPINC1	200	310	466	241	502	45	921
AGTAGTTACACACCTCGCAG	ZFHX3_AGTAGTTACACACCTCGCAG	ZFHX3	174	398	525	371	429	612	153
CCGTTCGTTTGTGACCCACG	ZFHX3_CCGTTCGTTTGTGACCCACG	ZFHX3	149	189	335	299	187	108	157
CGTCTGCAACAAGTTCACGA	ZFHX3_CGTCTGCAACAAGTTCACGA	ZFHX3	299	276	476	257	450	887	313
GAGCACGTTAGGCATTAAGG	ZFHX3_GAGCACGTTAGGCATTAAGG	ZFHX3	388	574	290	446	372	238	311
AAGTATCTGCTGTCCATCAG	ATF1_AAGTATCTGCTGTCCATCAG	ATF1	73	238	449	388	479	356	190
CAACTGTAAGGCTCCATTTG	ATF1_CAACTGTAAGGCTCCATTTG	ATF1	137	398	439	183	362	913	339
GCGCCGTGCTAGGATCCCGT	ATF1_GCGCCGTGCTAGGATCCCGT	ATF1	612	348	328	305	325	415	212
TTATCTTCTGAAGATACACG	ATF1_TTATCTTCTGAAGATACACG	ATF1	225	259	132	262	138	76	243
CCAGCGCAGAGGACATCCGG	ATF3_CCAGCGCAGAGGACATCCGG	ATF3	49	300	475	375	461	169	77
GGCAGAAGCACTCACTTCCG	ATF3_GGCAGAAGCACTCACTTCCG	ATF3	564	549	514	443	608	509	233
TCAAACACCAGTGACCCAGG	ATF3_TCAAACACCAGTGACCCAGG	ATF3	203	268	160	236	423	24	127
TGTCAGCGACAGACCCCTCG	ATF3_TGTCAGCGACAGACCCCTCG	ATF3	209	640	722	626	562	729	215
AGATGACCTTCTGACCACGT	ATF4_AGATGACCTTCTGACCACGT	ATF4	223	282	288	356	327	87	94
AGTCCCTCCAACAACAGCAA	ATF4_AGTCCCTCCAACAACAGCAA	ATF4	647	306	306	320	364	321	338
TAATAAGCAGCCCCCCCAGA	ATF4_TAATAAGCAGCCCCCCCAGA	ATF4	404	137	137	160	171	83	2
TCTCTTAGATGATTACCTGG	ATF4_TCTCTTAGATGATTACCTGG	ATF4	0	0	0	0	30	0	0
ACACCACTGTCACTCGAGCG	ATIC_ACACCACTGTCACTCGAGCG	ATIC	597	347	558	612	683	128	244
AGTTGGTACATCACAAACAT	ATIC_AGTTGGTACATCACAAACAT	ATIC	430	407	427	411	372	142	306
GCACAAGTTTATAAATCCAG	ATIC_GCACAAGTTTATAAATCCAG	ATIC	298	144	146	272	217	188	43
TGAATCTGGTCGCTTCCGGA	ATIC_TGAATCTGGTCGCTTCCGGA	ATIC	380	224	208	163	214	418	1005
CCAAGGCTATTCAGTGTGCG	ATM_CCAAGGCTATTCAGTGTGCG	ATM	82	707	576	560	471	358	243
GACCTACCTGAATAACACAC	ATM_GACCTACCTGAATAACACAC	ATM	455	381	482	679	640	234	120
TCATCACCAAGTTCGCATGT	ATM_TCATCACCAAGTTCGCATGT	ATM	714	564	544	529	573	250	272
TCTACCCCAACAGCGACATG	ATM_TCTACCCCAACAGCGACATG	ATM	941	757	732	829	483	596	83
CAGAGTGGTGTCATCCCGAG	RERE_CAGAGTGGTGTCATCCCGAG	RERE	99	297	303	240	213	26	38
CAGATGTCGACACTACGCAG	RERE_CAGATGTCGACACTACGCAG	RERE	693	727	851	786	603	47	591
GTGTGTATATCGAGAGTCGG	RERE_GTGTGTATATCGAGAGTCGG	RERE	454	442	293	277	219	328	4
TAGAGAGTTTAAAGCCCGAG	RERE_TAGAGAGTTTAAAGCCCGAG	RERE	77	163	157	222	146	25	619
CTCGCCTGCAAAGTTGCAGG	ATOH1_CTCGCCTGCAAAGTTGCAGG	ATOH1	529	365	472	294	390	126	324
GAGCTGCTACAAACGCCCAG	ATOH1_GAGCTGCTACAAACGCCCAG	ATOH1	960	1464	1236	876	1121	783	643
GCTGTGCAAGCTGAAAGGCG	ATOH1_GCTGTGCAAGCTGAAAGGCG	ATOH1	678	319	779	443	451	1846	413
GGAATGTAGCAAATACTGGG	ATOH1_GGAATGTAGCAAATACTGGG	ATOH1	517	742	740	806	761	242	290
TCAATGCAGACCTTCTTGTT	ATOX1_TCAATGCAGACCTTCTTGTT	ATOX1	1211	733	861	509	687	836	93
TCAGAAGCACGAGTTCTCTG	ATOX1_TCAGAAGCACGAGTTCTCTG	ATOX1	210	425	711	412	631	185	224
TCTCGGGTCCTCAATAAGCT	ATOX1_TCTCGGGTCCTCAATAAGCT	ATOX1	0	0	0	0	0	0	0
TTCTCTGTGGACATGACCTG	ATOX1_TTCTCTGTGGACATGACCTG	ATOX1	612	410	578	352	461	542	177
ATCCATTCAGGAGTAGTGGG	ATP1A1_ATCCATTCAGGAGTAGTGGG	ATP1A1	1191	120	58	198	201	581	62
CCTGCCTCTTACCGTGACAG	ATP1A1_CCTGCCTCTTACCGTGACAG	ATP1A1	268	9	10	37	7	0	9
GCAACCAGTTATGATTACAA	ATP1A1_GCAACCAGTTATGATTACAA	ATP1A1	183	6	0	26	0	19	14
TGGTATTGTTGTCTACACTG	ATP1A1_TGGTATTGTTGTCTACACTG	ATP1A1	404	0	0	71	25	8	7
CATGAGAAGAGATGATCCGG	ATP1A2_CATGAGAAGAGATGATCCGG	ATP1A2	394	532	696	461	741	416	840
CTGAGGCGAGAGTAGCTATG	ATP1A2_CTGAGGCGAGAGTAGCTATG	ATP1A2	411	1088	1644	668	1436	1147	858
GTTCGACAACCAAATCCATG	ATP1A2_GTTCGACAACCAAATCCATG	ATP1A2	858	1283	930	981	643	1049	462
TCGGGGCTTCAAATTCGACA	ATP1A2_TCGGGGCTTCAAATTCGACA	ATP1A2	753	684	607	725	728	1275	213
ACATGTGGGCGACTGTCATG	ATP1A3_ACATGTGGGCGACTGTCATG	ATP1A3	371	447	579	493	397	339	58
CACTCACGTTGTCACCAGAG	ATP1A3_CACTCACGTTGTCACCAGAG	ATP1A3	144	626	621	352	550	395	39
CTCGGATTCGCCAGTCAGGG	ATP1A3_CTCGGATTCGCCAGTCAGGG	ATP1A3	133	264	491	225	597	144	39
GCTCTCCATCCATGAGACCG	ATP1A3_GCTCTCCATCCATGAGACCG	ATP1A3	65	462	182	327	211	431	40
ACATCGCCTCAACATTGCTG	ATP12A_ACATCGCCTCAACATTGCTG	ATP12A	816	2284	2354	1869	1831	1312	1250
CACCATCATGATCAACGGCG	ATP12A_CACCATCATGATCAACGGCG	ATP12A	1062	976	1201	967	1121	1066	428
GTCGCTGACAGCAAAACGGA	ATP12A_GTCGCTGACAGCAAAACGGA	ATP12A	1040	1040	1050	766	825	649	413
TGGGTAAACTCAGAGGAGCG	ATP12A_TGGGTAAACTCAGAGGAGCG	ATP12A	1067	1015	1007	888	1004	756	531
AAGGAAATCCTGACTCGAGG	ATP1A4_AAGGAAATCCTGACTCGAGG	ATP1A4	627	686	627	553	795	402	433
CGCCAGGCCTGACGTCAGGG	ATP1A4_CGCCAGGCCTGACGTCAGGG	ATP1A4	716	1115	1125	824	867	1743	482
GAGCATCGTACTGTCCGTCG	ATP1A4_GAGCATCGTACTGTCCGTCG	ATP1A4	609	531	767	413	623	201	192
TGATGAAGGGTGCTCCGGAG	ATP1A4_TGATGAAGGGTGCTCCGGAG	ATP1A4	1485	557	775	499	698	1137	1015
CCCAGTGAACCGAAAGAACG	ATP1B1_CCCAGTGAACCGAAAGAACG	ATP1B1	509	1161	696	929	773	2936	771
CTTGGGATCATTAGGACGAA	ATP1B1_CTTGGGATCATTAGGACGAA	ATP1B1	1360	772	785	563	856	164	804
TCCAAGGACTCATTCTTGGG	ATP1B1_TCCAAGGACTCATTCTTGGG	ATP1B1	577	1025	1766	919	1531	1732	668
TGTGGGCTTAAATTCACTGA	ATP1B1_TGTGGGCTTAAATTCACTGA	ATP1B1	846	686	822	586	655	1198	463
AGGAGTTCGTGTGGAACCCG	ATP1B2_AGGAGTTCGTGTGGAACCCG	ATP1B2	1260	444	742	675	733	702	279
AGTGCTGTAACCATAGTGGG	ATP1B2_AGTGCTGTAACCATAGTGGG	ATP1B2	845	1018	1100	972	1187	1598	894
GTTCGTAATAGCGTCCAGGG	ATP1B2_GTTCGTAATAGCGTCCAGGG	ATP1B2	469	802	1129	947	964	1093	1526
TGAGGAACCCATAAAAAACG	ATP1B2_TGAGGAACCCATAAAAAACG	ATP1B2	263	248	376	228	496	88	102
ACTGAATGTATATTCCAATG	ATP1B3_ACTGAATGTATATTCCAATG	ATP1B3	308	293	385	187	535	271	77
CCAGGAACCCATAAAAAACT	ATP1B3_CCAGGAACCCATAAAAAACT	ATP1B3	309	243	176	251	171	353	478
CGACCACCGGAGAATTCCTG	ATP1B3_CGACCACCGGAGAATTCCTG	ATP1B3	1299	369	452	302	539	168	500
GCTTCAGACTCTCAACGATG	ATP1B3_GCTTCAGACTCTCAACGATG	ATP1B3	426	356	418	388	668	88	620
ACTGGGTTGTCGATGGACGG	FXYD2_ACTGGGTTGTCGATGGACGG	FXYD2	409	398	439	493	422	409	218
CCAGGCTTACCATAGTAGAA	FXYD2_CCAGGCTTACCATAGTAGAA	FXYD2	565	774	846	633	899	437	432
CTATGAGACCGTTCGCAATG	FXYD2_CTATGAGACCGTTCGCAATG	FXYD2	772	639	622	426	684	220	823
CTGGACTGGCCTTCATCGTG	FXYD2_CTGGACTGGCCTTCATCGTG	FXYD2	800	1634	1026	1393	1060	1448	788
GCGGTCGATGACGCCCTCAG	ATP2A1_GCGGTCGATGACGCCCTCAG	ATP2A1	468	450	689	503	648	202	289
GGTGGTGAGTGCTGTCTCGG	ATP2A1_GGTGGTGAGTGCTGTCTCGG	ATP2A1	423	248	506	498	464	745	362
TCACCCGGATCCCGGCGTCA	ATP2A1_TCACCCGGATCCCGGCGTCA	ATP2A1	431	397	407	386	453	1321	237
TTCAACGACCCCGTCCATGG	ATP2A1_TTCAACGACCCCGTCCATGG	ATP2A1	161	291	686	303	340	990	113
AGATAACAGAAGTACAACCA	ATP2A2_AGATAACAGAAGTACAACCA	ATP2A2	218	0	19	0	0	0	0
GAGGCCACCTCGATTCTCGG	ATP2A2_GAGGCCACCTCGATTCTCGG	ATP2A2	293	32	3	56	0	0	0
GTACACCAAATAAACCAAGC	ATP2A2_GTACACCAAATAAACCAAGC	ATP2A2	153	83	28	94	103	304	27
GTTCAACTCGAGCAAAACAG	ATP2A2_GTTCAACTCGAGCAAAACAG	ATP2A2	0	3	0	0	11	0	0
ATGATCACGGGGGATAACAA	ATP2A3_ATGATCACGGGGGATAACAA	ATP2A3	631	548	356	425	252	9	242
CCTACTTACAAAGGAGACAA	ATP2A3_CCTACTTACAAAGGAGACAA	ATP2A3	733	225	216	119	264	94	69
GCCGTGTGGGTCATCAACAT	ATP2A3_GCCGTGTGGGTCATCAACAT	ATP2A3	295	395	362	210	512	329	149
GGGTACCACGTATACCCCCG	ATP2A3_GGGTACCACGTATACCCCCG	ATP2A3	0	59	289	19	110	13	181
AGAGGGCTGGAATTACTGTG	ATP2B1_AGAGGGCTGGAATTACTGTG	ATP2B1	777	1358	1363	1299	834	999	988
ATTGATGAAAGCTCATTGAC	ATP2B1_ATTGATGAAAGCTCATTGAC	ATP2B1	941	424	1155	641	840	808	705
GGCAAAAGTATTCAGACCAA	ATP2B1_GGCAAAAGTATTCAGACCAA	ATP2B1	328	322	706	481	644	220	1352
GGTGGATTACCTCGTCACGT	ATP2B1_GGTGGATTACCTCGTCACGT	ATP2B1	292	353	217	130	284	305	228
CCCAACGGACAAGCATACCC	ATP2B2_CCCAACGGACAAGCATACCC	ATP2B2	316	726	601	693	870	736	850
CTGTACCACTGTCATGCGAT	ATP2B2_CTGTACCACTGTCATGCGAT	ATP2B2	362	826	839	500	562	81	558
GCAGGAACAGAAATTTACCG	ATP2B2_GCAGGAACAGAAATTTACCG	ATP2B2	297	123	94	233	41	50	31
TGGGCTCCGCACTATCTGCG	ATP2B2_TGGGCTCCGCACTATCTGCG	ATP2B2	406	530	623	643	704	357	87
AACAGCAATGGCGAACTCCG	ATP2B3_AACAGCAATGGCGAACTCCG	ATP2B3	111	524	438	580	425	774	882
CTGGACCACGGTCATACGGT	ATP2B3_CTGGACCACGGTCATACGGT	ATP2B3	185	212	251	246	394	264	27
TCCCACCGACAAGCACACAC	ATP2B3_TCCCACCGACAAGCACACAC	ATP2B3	222	623	472	437	345	197	117
TGTCTGGGAATTCACGCCAA	ATP2B3_TGTCTGGGAATTCACGCCAA	ATP2B3	110	358	371	293	365	354	111
CCAGGAGGGAATCGACAATG	ATP2B4_CCAGGAGGGAATCGACAATG	ATP2B4	8	349	271	266	178	5	96
CGATACAGGTCAGTTCGGTG	ATP2B4_CGATACAGGTCAGTTCGGTG	ATP2B4	389	306	364	324	379	38	71
TAGACTGAAAACCTCCCCTG	ATP2B4_TAGACTGAAAACCTCCCCTG	ATP2B4	215	417	956	490	686	259	358
TGTGCGTAATGAAGTGCCCG	ATP2B4_TGTGCGTAATGAAGTGCCCG	ATP2B4	358	338	378	180	273	809	268
GATCAACGCTGACCAACTGG	ATP4A_GATCAACGCTGACCAACTGG	ATP4A	407	657	945	461	612	865	1353
GGGATGGGCCCAACGCACTG	ATP4A_GGGATGGGCCCAACGCACTG	ATP4A	824	741	797	476	726	481	1009
GGGGGCTTCACAGACCCTCA	ATP4A_GGGGGCTTCACAGACCCTCA	ATP4A	779	892	912	694	745	1469	565
TGGCTATGCCTTCGACGTAG	ATP4A_TGGCTATGCCTTCGACGTAG	ATP4A	152	1100	652	558	746	1289	616
AGGCGTGGAGAGTCTGTGTG	ATP4B_AGGCGTGGAGAGTCTGTGTG	ATP4B	437	671	617	431	546	191	594
CTTAAGGCCGGATGTTTACG	ATP4B_CTTAAGGCCGGATGTTTACG	ATP4B	581	556	468	590	370	248	430
GACAGTGGACCCGTACACAC	ATP4B_GACAGTGGACCCGTACACAC	ATP4B	857	624	839	581	645	101	1919
GGCCTGGCGGATCCCAACTT	ATP4B_GGCCTGGCGGATCCCAACTT	ATP4B	477	308	502	359	384	55	168
AAATTCGAGGAATGATACCG	ATP5A1_AAATTCGAGGAATGATACCG	ATP5A1	1209	13	86	161	284	21	591
ACCAACTGGAACGTCCACAA	ATP5A1_ACCAACTGGAACGTCCACAA	ATP5A1	575	3	3	157	97	16	58
AGGATAGGCCTCACGACCAG	ATP5A1_AGGATAGGCCTCACGACCAG	ATP5A1	670	0	3	58	9	0	0
TTATTGGTGACCGACAGACT	ATP5A1_TTATTGGTGACCGACAGACT	ATP5A1	702	2	14	38	137	2	34
ACTCACCAGTCGCCTCGCAG	ALDH7A1_ACTCACCAGTCGCCTCGCAG	ALDH7A1	436	373	659	248	449	195	506
ATTCTTAATTTAGGCCAGTG	ALDH7A1_ATTCTTAATTTAGGCCAGTG	ALDH7A1	347	559	682	386	417	603	492
ATTGAGCAGTGGAATCCCGT	ALDH7A1_ATTGAGCAGTGGAATCCCGT	ALDH7A1	684	739	454	758	490	1664	883
GGGCTCCGCGAGGAAAACGA	ALDH7A1_GGGCTCCGCGAGGAAAACGA	ALDH7A1	0	398	169	378	195	1833	154
CTGCATAGTACCCATGTCAG	ATP5B_CTGCATAGTACCCATGTCAG	ATP5B	335	17	20	150	248	4	50
GCACCAATCAAAATTCCTGT	ATP5B_GCACCAATCAAAATTCCTGT	ATP5B	418	9	59	167	107	54	75
GGTGGACGTCCAGTTTGATG	ATP5B_GGTGGACGTCCAGTTTGATG	ATP5B	0	0	5	34	0	5	11
GTTGGTGAGAGGACCCGTGA	ATP5B_GTTGGTGAGAGGACCCGTGA	ATP5B	424	2	4	78	96	13	79
ACCACACAGTCCTCGATCTG	ATP5C1_ACCACACAGTCCTCGATCTG	ATP5C1	294	80	83	161	309	12	140
ATGAAAAAGCTGATATCAAG	ATP5C1_ATGAAAAAGCTGATATCAAG	ATP5C1	285	183	175	168	237	378	22
CAAGTCTATGAAAATGGTAG	ATP5C1_CAAGTCTATGAAAATGGTAG	ATP5C1	280	21	26	160	175	133	45
TATTTCGAACTTGAATCCTG	ATP5C1_TATTTCGAACTTGAATCCTG	ATP5C1	508	63	72	251	192	19	15
CAACAACTGCACCGAAGAGT	ATP5D_CAACAACTGCACCGAAGAGT	ATP5D	1002	91	39	342	180	68	13
CCACGCCCGTGCCTATGCCG	ATP5D_CCACGCCCGTGCCTATGCCG	ATP5D	978	423	224	464	274	198	1014
CCCATTCCCCCAGTGAGCAG	ATP5D_CCCATTCCCCCAGTGAGCAG	ATP5D	782	29	50	356	341	67	104
CGCAGCGCCCGAACCTGCGT	ATP5D_CGCAGCGCCCGAACCTGCGT	ATP5D	741	67	97	245	320	23	30
ACTGGAGACAGGCTGGACTC	ATP5E_ACTGGAGACAGGCTGGACTC	ATP5E	531	36	29	120	432	1	25
GAGACAGGCTGGACTCAGGT	ATP5E_GAGACAGGCTGGACTCAGGT	ATP5E	641	22	36	164	404	23	97
GAGTCCAGCCTGTCTCCAGT	ATP5E_GAGTCCAGCCTGTCTCCAGT	ATP5E	398	20	6	143	29	37	28
TTGCACAGATCTGGGAGTAT	ATP5E_TTGCACAGATCTGGGAGTAT	ATP5E	736	60	81	406	472	201	92
AGCCCAGTTCCGAGTACATA	ATP5F1_AGCCCAGTTCCGAGTACATA	ATP5F1	217	17	11	113	197	50	117
CAACAAGGACCTTTCATACA	ATP5F1_CAACAAGGACCTTTCATACA	ATP5F1	292	111	63	145	199	72	33
CTTTGCTGATAAACTCAATG	ATP5F1_CTTTGCTGATAAACTCAATG	ATP5F1	129	123	95	152	190	174	15
TCGTTATGGACTGATCCCTG	ATP5F1_TCGTTATGGACTGATCCCTG	ATP5F1	996	37	96	389	371	164	278
AATGTCCCGGGAGACAACAC	ATP5G1_AATGTCCCGGGAGACAACAC	ATP5G1	294	107	27	51	28	35	85
ATTCACTGGGCTATTCAAGA	ATP5G1_ATTCACTGGGCTATTCAAGA	ATP5G1	373	545	506	427	530	590	1133
CAGATCCGCTGTTGTACCAG	ATP5G1_CAGATCCGCTGTTGTACCAG	ATP5G1	240	125	106	109	132	57	51
CAGCAACTTCCCACTCCAGG	ATP5G1_CAGCAACTTCCCACTCCAGG	ATP5G1	170	197	126	183	150	1	37
ACCGGAGATACTGACAGATG	ATP5G2_ACCGGAGATACTGACAGATG	ATP5G2	444	460	608	240	632	963	352
AGAACCAGCCACCCCAACTG	ATP5G2_AGAACCAGCCACCCCAACTG	ATP5G2	936	212	276	317	531	177	355
GATGTCCCTTGAAATGGCGC	ATP5G2_GATGTCCCTTGAAATGGCGC	ATP5G2	92	255	141	178	139	228	383
GCACCACTGCAGATAGCGGA	ATP5G2_GCACCACTGCAGATAGCGGA	ATP5G2	720	179	593	207	469	293	275
ATCAGTGTTATCTCGACCAG	ATP5G3_ATCAGTGTTATCTCGACCAG	ATP5G3	169	390	526	500	383	946	474
CATTAAATACCGTAGAGCCC	ATP5G3_CATTAAATACCGTAGAGCCC	ATP5G3	415	272	319	259	116	347	961
GCCTGGGCTACGCACCAGAG	ATP5G3_GCCTGGGCTACGCACCAGAG	ATP5G3	123	305	248	157	288	52	114
TGTGTCTCAGCTAATCCAAA	ATP5G3_TGTGTCTCAGCTAATCCAAA	ATP5G3	460	223	281	358	318	73	131
AACAGATTACCTAAAACCTC	ATP5I_AACAGATTACCTAAAACCTC	ATP5I	375	66	331	89	189	83	36
CGAGGAACAGGGCGGAGTAG	ATP5I_CGAGGAACAGGGCGGAGTAG	ATP5I	192	4	9	42	58	13	5
CGGTCACTCACTGTAGCGCG	ATP5I_CGGTCACTCACTGTAGCGCG	ATP5I	747	493	723	537	728	118	202
GTAGGCCACACCGAGGAACA	ATP5I_GTAGGCCACACCGAGGAACA	ATP5I	1499	18	32	376	607	41	137
CCTCCGCAAATGGACTGAGA	ATP5J_CCTCCGCAAATGGACTGAGA	ATP5J	304	59	108	107	126	31	5
GACGGCTGACCGAATGACAG	ATP5J_GACGGCTGACCGAATGACAG	ATP5J	144	207	52	127	170	161	30
TACTCTGAACTAGCATCAAC	ATP5J_TACTCTGAACTAGCATCAAC	ATP5J	296	91	213	233	211	62	80
TCCACAAAGAGTTTCTGTAT	ATP5J_TCCACAAAGAGTTTCTGTAT	ATP5J	151	28	32	89	192	79	35
AGTGGTTACAGCCTGTGACA	ATP6V1A_AGTGGTTACAGCCTGTGACA	ATP6V1A	581	71	137	134	161	8	3
ATGTTACCCCCACGAAACAG	ATP6V1A_ATGTTACCCCCACGAAACAG	ATP6V1A	1045	58	65	112	139	9	17
GTAATCATCTATGTAGGATG	ATP6V1A_GTAATCATCTATGTAGGATG	ATP6V1A	67	7	3	104	85	0	0
TGACTGCTGATATCCGACAA	ATP6V1A_TGACTGCTGATATCCGACAA	ATP6V1A	335	95	85	174	63	25	394
AGCCCGAGAACACATGCAGG	ATP6V1B1_AGCCCGAGAACACATGCAGG	ATP6V1B1	1013	1083	844	823	738	781	545
CCGTCTGAATCATCTCCTCG	ATP6V1B1_CCGTCTGAATCATCTCCTCG	ATP6V1B1	1138	628	543	526	482	246	235
CCTCTGACACCGGAGTTCGT	ATP6V1B1_CCTCTGACACCGGAGTTCGT	ATP6V1B1	103	240	273	175	248	32	49
GCTACACCTCCAGGATCGAG	ATP6V1B1_GCTACACCTCCAGGATCGAG	ATP6V1B1	781	222	347	175	308	266	981
CTCTGATACTCACTGAGGCG	ATP6V1B2_CTCTGATACTCACTGAGGCG	ATP6V1B2	66	6	62	2	86	0	0
TCAATGTCGAATCTACCCAG	ATP6V1B2_TCAATGTCGAATCTACCCAG	ATP6V1B2	452	0	3	0	8	0	1
TGCTGGGCTACCACACAATG	ATP6V1B2_TGCTGGGCTACCACACAATG	ATP6V1B2	269	19	0	13	75	4	0
TGGGGATATTCTCCGAACAC	ATP6V1B2_TGGGGATATTCTCCGAACAC	ATP6V1B2	136	1	0	16	23	3	0
CAAGAGCGGTACCGGCATTG	ATP6V0C_CAAGAGCGGTACCGGCATTG	ATP6V0C	1206	94	5	68	132	9	1
CATTCAGGGAGTTGGCGATG	ATP6V0C_CATTCAGGGAGTTGGCGATG	ATP6V0C	190	2	21	32	33	0	0
TCGGCCGCCATGGTCTTCAG	ATP6V0C_TCGGCCGCCATGGTCTTCAG	ATP6V0C	629	2	26	31	70	0	0
TGATGCCAGCCATGACCACT	ATP6V0C_TGATGCCAGCCATGACCACT	ATP6V0C	823	12	35	18	124	0	0
ACTGCTTAATCCAGTCGTTG	ATP6V1C1_ACTGCTTAATCCAGTCGTTG	ATP6V1C1	530	7	14	188	131	0	0
ATCAACTGCCTTCCTAAACA	ATP6V1C1_ATCAACTGCCTTCCTAAACA	ATP6V1C1	423	6	7	87	130	0	0
GAGAATCTGTTGGCTAATGG	ATP6V1C1_GAGAATCTGTTGGCTAATGG	ATP6V1C1	601	81	35	195	87	67	0
TAAGAAAGTAGCTCAATACA	ATP6V1C1_TAAGAAAGTAGCTCAATACA	ATP6V1C1	47	18	23	50	132	0	0
AGTTCAACATAGAGAAAGGT	ATP6V1E1_AGTTCAACATAGAGAAAGGT	ATP6V1E1	264	30	45	100	73	8	4
AGTTCTTTACCTTTACCAGA	ATP6V1E1_AGTTCTTTACCTTTACCAGA	ATP6V1E1	299	45	48	50	67	0	26
CTGCAACGAACAATCATTCG	ATP6V1E1_CTGCAACGAACAATCATTCG	ATP6V1E1	273	0	9	4	0	0	4
TAAGGTCATCTCTTGCTCTG	ATP6V1E1_TAAGGTCATCTCTTGCTCTG	ATP6V1E1	344	12	14	123	26	0	19
CCCAGGTTGGACCACATGAA	ATP6V0B_CCCAGGTTGGACCACATGAA	ATP6V0B	360	3	53	102	84	0	0
GCCGGTAATATAGATGCCCC	ATP6V0B_GCCGGTAATATAGATGCCCC	ATP6V0B	381	0	0	0	30	0	0
GGCCATCGGAACTACCATGC	ATP6V0B_GGCCATCGGAACTACCATGC	ATP6V0B	735	49	137	79	23	0	4
TTTGGGCTTCCGCTTTGATG	ATP6V0B_TTTGGGCTTCCGCTTTGATG	ATP6V0B	322	80	20	215	37	23	8
ATTCGTGCTCTCGCTCTCTG	ATP6V1G2_ATTCGTGCTCTCGCTCTCTG	ATP6V1G2	603	874	818	714	613	589	750
CAGAAGCTGCTGGATACCTT	ATP6V1G2_CAGAAGCTGCTGGATACCTT	ATP6V1G2	895	663	923	644	782	384	516
CCCAGGCCATGGGCTCCCAG	ATP6V1G2_CCCAGGCCATGGGCTCCCAG	ATP6V1G2	526	391	576	409	540	81	281
GCGACTGAAGCAGGCAAAGG	ATP6V1G2_GCGACTGAAGCAGGCAAAGG	ATP6V1G2	592	215	437	336	517	182	331
AAAGGTTCTGAATCAAACGG	ATP6V0A1_AAAGGTTCTGAATCAAACGG	ATP6V0A1	789	635	1173	897	871	618	634
AACATTCCGATTATGGACAC	ATP6V0A1_AACATTCCGATTATGGACAC	ATP6V0A1	961	1169	1044	900	995	971	817
ATTGCATCATCAGCAGATGG	ATP6V0A1_ATTGCATCATCAGCAGATGG	ATP6V0A1	227	751	461	480	451	540	144
GTCCAATTATAAGTAAACAT	ATP6V0A1_GTCCAATTATAAGTAAACAT	ATP6V0A1	132	90	114	163	155	19	4
CGAAGATGTCCCATACACAG	ATP6AP1_CGAAGATGTCCCATACACAG	ATP6AP1	166	47	77	34	62	14	0
GCCGCCAACGACAAAAACAC	ATP6AP1_GCCGCCAACGACAAAAACAC	ATP6AP1	195	6	31	20	95	0	58
GCTGACTGCATACCAGTCGA	ATP6AP1_GCTGACTGCATACCAGTCGA	ATP6AP1	336	148	151	97	189	105	186
GTTACAATGACACCGCTCCC	ATP6AP1_GTTACAATGACACCGCTCCC	ATP6AP1	645	97	155	223	194	124	0
AAATTCATAACAGACAATCC	ATP7A_AAATTCATAACAGACAATCC	ATP7A	542	859	539	863	485	429	462
AATTACAATCCATACCAAGA	ATP7A_AATTACAATCCATACCAAGA	ATP7A	656	746	726	815	1017	356	472
CAATAGAGGCTGTATCACCG	ATP7A_CAATAGAGGCTGTATCACCG	ATP7A	548	1250	1296	968	1112	2209	972
CTTTACTCTCCATACAGGGG	ATP7A_CTTTACTCTCCATACAGGGG	ATP7A	670	900	1260	886	1133	1425	1087
ACCATGATGAGTGTCCATCG	ATP5O_ACCATGATGAGTGTCCATCG	ATP5O	201	12	70	304	300	8	328
ATACCGTATACCTGAACAGG	ATP5O_ATACCGTATACCTGAACAGG	ATP5O	553	165	106	374	241	30	19
CTGATCAGATTGGTAGTGAG	ATP5O_CTGATCAGATTGGTAGTGAG	ATP5O	195	866	1093	682	1039	356	3945
GGTCGATTAAGCAATACCCA	ATP5O_GGTCGATTAAGCAATACCCA	ATP5O	943	34	11	86	295	24	80
AGGGACCATGTAAATGACAT	ATP7B_AGGGACCATGTAAATGACAT	ATP7B	308	322	458	434	418	475	248
ATGAACTGAGCTATCTCGAG	ATP7B_ATGAACTGAGCTATCTCGAG	ATP7B	292	399	646	352	383	95	369
CTCACCAAGGGTCACAACGG	ATP7B_CTCACCAAGGGTCACAACGG	ATP7B	223	615	528	485	640	166	2050
CTCATTAAAGCTACCCACGT	ATP7B_CTCATTAAAGCTACCCACGT	ATP7B	105	443	450	431	380	175	129
CTGTGTGAGATGGTCAAGCA	ATR_CTGTGTGAGATGGTCAAGCA	ATR	574	25	2	33	41	0	0
GATGCTTTGATTTATATGCA	ATR_GATGCTTTGATTTATATGCA	ATR	146	17	7	93	36	0	10
GCCCAGGTCACCAATTGTGG	ATR_GCCCAGGTCACCAATTGTGG	ATR	409	22	35	81	98	9	13
TGACGTGCGAAAACAAGATG	ATR_TGACGTGCGAAAACAAGATG	ATR	267	174	195	171	161	45	7
AATTAGTGCGGAATAAGAGT	ATRX_AATTAGTGCGGAATAAGAGT	ATRX	91	225	245	429	265	284	162
ATGATTTAAAGACTCAGGCG	ATRX_ATGATTTAAAGACTCAGGCG	ATRX	325	108	145	118	172	9	334
CTTACCAAGGCCCATACAGT	ATRX_CTTACCAAGGCCCATACAGT	ATRX	551	271	284	313	311	364	678
GAAAATCTCAAAAAACGCGG	ATRX_GAAAATCTCAAAAAACGCGG	ATRX	580	321	220	269	309	204	147
AGGACCAGTACCGCCGCGAG	KIF1A_AGGACCAGTACCGCCGCGAG	KIF1A	296	332	413	369	260	802	584
ATTGCCACACGGTGTACCAG	KIF1A_ATTGCCACACGGTGTACCAG	KIF1A	407	825	385	904	658	817	898
CAAACAAGATGCGCTCGTGG	KIF1A_CAAACAAGATGCGCTCGTGG	KIF1A	101	226	214	102	335	151	73
GTCAACACGGAATCTCGGTA	KIF1A_GTCAACACGGAATCTCGGTA	KIF1A	278	507	548	392	577	651	126
AAAATGAGTTCCAGTGAAGT	AUH_AAAATGAGTTCCAGTGAAGT	AUH	735	835	711	652	648	480	1495
ACCTGCTACTCGTATATCAC	AUH_ACCTGCTACTCGTATATCAC	AUH	352	695	564	564	387	123	196
ATACCAGCACAGAATATCCC	AUH_ATACCAGCACAGAATATCCC	AUH	1137	904	759	924	1022	730	487
GAACTACTCATACCTCCACC	AUH_GAACTACTCATACCTCCACC	AUH	625	830	722	662	720	225	632
CAGGGGTCTCTGAACTTGCA	AUP1_CAGGGGTCTCTGAACTTGCA	AUP1	178	140	144	266	125	7	76
GACCAGCACACAAAGCTGGG	AUP1_GACCAGCACACAAAGCTGGG	AUP1	608	150	95	188	161	148	20
GTGTCCCCAGATTCGTAGTG	AUP1_GTGTCCCCAGATTCGTAGTG	AUP1	753	727	823	919	918	191	347
TCCTGTTCATCGCCAACTAG	AUP1_TCCTGTTCATCGCCAACTAG	AUP1	162	72	208	87	143	0	27
CAAGAGGGCCATGTCCGACC	AVP_CAAGAGGGCCATGTCCGACC	AVP	359	237	299	173	226	12	48
GCAGTTCTGGAAGTAGCACG	AVP_GCAGTTCTGGAAGTAGCACG	AVP	472	269	568	312	484	169	143
GTCGTTGCAGCAAACGCCGA	AVP_GTCGTTGCAGCAAACGCCGA	AVP	19	110	98	108	90	84	610
TCGTCCGCGCAGCAGATGCT	AVP_TCGTCCGCGCAGCAGATGCT	AVP	44	310	516	137	274	292	629
ACCGAGGGACGTGCGCAACG	AVPR1A_ACCGAGGGACGTGCGCAACG	AVPR1A	1390	1790	2437	1167	1627	1472	1708
GACAGCCGACCGCTACATCG	AVPR1A_GACAGCCGACCGCTACATCG	AVPR1A	671	823	1089	766	863	1097	1181
GACATCACCTACCGCTTCCG	AVPR1A_GACATCACCTACCGCTTCCG	AVPR1A	1016	736	1193	945	896	756	1440
TGCATGCGGGACGTCTTGCG	AVPR1A_TGCATGCGGGACGTCTTGCG	AVPR1A	756	1335	1036	889	842	1110	1292
AAAAAATGAAGACTTGAGGG	AVPR1B_AAAAAATGAAGACTTGAGGG	AVPR1B	282	83	169	326	85	46	15
AAACCTAAAAGTCAAGACAC	AVPR1B_AAACCTAAAAGTCAAGACAC	AVPR1B	433	432	715	744	565	190	459
CAGAACGAAGATAGCCAGGG	AVPR1B_CAGAACGAAGATAGCCAGGG	AVPR1B	997	782	904	660	1028	467	1117
GCAGCATCAACACCATCTCA	AVPR1B_GCAGCATCAACACCATCTCA	AVPR1B	205	84	304	105	303	32	466
ATACTTCACGGCCCGACACA	AVPR2_ATACTTCACGGCCCGACACA	AVPR2	1190	1113	1486	1054	1318	1540	947
CAGGCGGCGATACCCAGGGT	AVPR2_CAGGCGGCGATACCCAGGGT	AVPR2	261	839	679	562	769	186	405
GGCGTACCGCCATGGAAGTG	AVPR2_GGCGTACCGCCATGGAAGTG	AVPR2	563	1518	1373	1132	1029	335	1438
TGGCCAATGAAGACGTGTAT	AVPR2_TGGCCAATGAAGACGTGTAT	AVPR2	455	639	1053	536	1267	74	670
CCCGAAGCCAATGTACCTCG	AXL_CCCGAAGCCAATGTACCTCG	AXL	123	366	364	331	286	21	2009
CCTAGCAGTACATACCACCA	AXL_CCTAGCAGTACATACCACCA	AXL	847	815	845	1041	991	3247	314
CGAAGCCCATAACGCCAAGG	AXL_CGAAGCCCATAACGCCAAGG	AXL	1050	1328	1657	1291	1173	436	915
CTGAGAACATTAGTGCTACG	AXL_CTGAGAACATTAGTGCTACG	AXL	781	600	787	554	780	1135	568
GACAGGAAGTCTCAGCCCAT	AZGP1_GACAGGAAGTCTCAGCCCAT	AZGP1	734	864	800	795	783	2283	1158
GGAGGTCATTGAGTGAGCCA	AZGP1_GGAGGTCATTGAGTGAGCCA	AZGP1	580	515	616	352	326	514	492
GGTATTTCCGCAGAGTCGCA	AZGP1_GGTATTTCCGCAGAGTCGCA	AZGP1	102	264	189	245	221	298	82
TCAGGGTCTCACGTATTGCA	AZGP1_TCAGGGTCTCACGTATTGCA	AZGP1	263	786	626	595	588	1409	456
CCGCCAACGATGTCCAAAAG	AZU1_CCGCCAACGATGTCCAAAAG	AZU1	861	564	904	620	664	266	186
GCACCACGGTGCTAACCCCG	AZU1_GCACCACGGTGCTAACCCCG	AZU1	119	297	285	268	264	228	260
GCCTCTGCAGAACGCCACGG	AZU1_GCCTCTGCAGAACGCCACGG	AZU1	718	735	749	609	592	1225	733
TGGCCGCGGTCATCACGAAG	AZU1_TGGCCGCGGTCATCACGAAG	AZU1	449	331	241	253	251	56	73
AAGTCAACTTCAATGTCGGA	B2M_AAGTCAACTTCAATGTCGGA	B2M	620	586	612	573	514	134	463
ACCCAGACACATAGCAATTC	B2M_ACCCAGACACATAGCAATTC	B2M	142	472	444	242	322	101	889
CTGAATCTTTGGAGTACCTG	B2M_CTGAATCTTTGGAGTACCTG	B2M	155	543	311	477	596	311	273
GAGTAGCGCGAGCACAGCTA	B2M_GAGTAGCGCGAGCACAGCTA	B2M	51	359	403	378	378	335	117
CAAACAAATCAATTACCCCT	BAAT_CAAACAAATCAATTACCCCT	BAAT	509	377	561	486	433	339	358
GACTTTGGAGAGGTGGTATG	BAAT_GACTTTGGAGAGGTGGTATG	BAAT	627	552	542	487	573	346	566
GAGACCAGAAGAGACCCATG	BAAT_GAGACCAGAAGAGACCCATG	BAAT	170	143	160	122	172	92	451
GGTCCCATTAATAAGTACCG	BAAT_GGTCCCATTAATAAGTACCG	BAAT	412	174	308	206	291	19	66
AACTGACAGAGTCCGTACTG	BACH1_AACTGACAGAGTCCGTACTG	BACH1	325	361	318	385	414	40	1145
CCTGGCCTACGATTCTTGAG	BACH1_CCTGGCCTACGATTCTTGAG	BACH1	1108	915	731	659	738	316	1669
CTAATCCTGATACCTAACCA	BACH1_CTAATCCTGATACCTAACCA	BACH1	828	544	653	466	685	284	211
GAAATCCGACTTGGGCACCA	BACH1_GAAATCCGACTTGGGCACCA	BACH1	226	294	325	312	363	1432	232
CATAGCGCTGTGCTGCCCAG	BAD_CATAGCGCTGTGCTGCCCAG	BAD	526	341	271	191	208	56	33
GCCACAGCTCCTACCCCGCG	BAD_GCCACAGCTCCTACCCCGCG	BAD	404	228	164	135	281	0	12
GGTGACTGGCGTCCCACAGG	BAD_GGTGACTGGCGTCCCACAGG	BAD	200	206	155	113	88	49	4
TGGGGTACTTACCTCCATGA	BAD_TGGGGTACTTACCTCCATGA	BAD	781	259	357	267	338	177	97
GGAGTCGACCCGGAGCGAGG	BAG1_GGAGTCGACCCGGAGCGAGG	BAG1	576	172	244	192	251	1008	305
GGGCATGACCGACCCACCAG	BAG1_GGGCATGACCGACCCACCAG	BAG1	629	767	725	873	719	288	320
TGAACCAGTTGTCCAAGACC	BAG1_TGAACCAGTTGTCCAAGACC	BAG1	294	364	441	379	422	192	19
TGTATTCCAAGTGCTGACAA	BAG1_TGTATTCCAAGTGCTGACAA	BAG1	318	152	141	221	179	370	3
CAGGATGAGTACCGGCAGTG	ADGRB1_CAGGATGAGTACCGGCAGTG	ADGRB1	689	1137	1233	1114	961	2240	537
CCCACGATGAGCGTCACCGA	ADGRB1_CCCACGATGAGCGTCACCGA	ADGRB1	736	754	787	681	606	361	1586
CCTGTGGGGCGAATGCACGC	ADGRB1_CCTGTGGGGCGAATGCACGC	ADGRB1	319	317	546	355	440	270	249
GAAGCATCCGTGTTTGTGGT	ADGRB1_GAAGCATCCGTGTTTGTGGT	ADGRB1	459	1085	1018	859	996	1286	493
ATCATCAGCCGAGGGCACGT	ADGRB2_ATCATCAGCCGAGGGCACGT	ADGRB2	997	842	655	598	597	390	690
CAGCCACTGATAGCAAGTGG	ADGRB2_CAGCCACTGATAGCAAGTGG	ADGRB2	494	554	518	690	523	871	281
CTCTCTCGTAGGCGACCCGG	ADGRB2_CTCTCTCGTAGGCGACCCGG	ADGRB2	536	538	661	675	694	195	421
TGAGCAAGACCTCGACAAAG	ADGRB2_TGAGCAAGACCTCGACAAAG	ADGRB2	195	266	551	237	415	146	212
AGGCGAATAAGGACCTGTCA	ADGRB3_AGGCGAATAAGGACCTGTCA	ADGRB3	948	700	733	655	766	436	454
AGGGTCAATAGAGTTAATGC	ADGRB3_AGGGTCAATAGAGTTAATGC	ADGRB3	0	89	172	189	51	0	26
CCAAGTCTGCAATCTTACCA	ADGRB3_CCAAGTCTGCAATCTTACCA	ADGRB3	441	768	1145	617	879	596	557
TACAGTACACGGAGTATGGG	ADGRB3_TACAGTACACGGAGTATGGG	ADGRB3	4	617	486	381	518	597	69
AAGACCCTTACCAGAAGCAG	BAK1_AAGACCCTTACCAGAAGCAG	BAK1	1133	619	724	746	684	202	482
ACGGCAGCTCGCCATCATCG	BAK1_ACGGCAGCTCGCCATCATCG	BAK1	713	970	588	642	520	2014	223
GCTCACCTGCTAGGTTGCAG	BAK1_GCTCACCTGCTAGGTTGCAG	BAK1	425	335	349	357	279	86	482
GGTAGACGTGTAGGGCCAGA	BAK1_GGTAGACGTGTAGGGCCAGA	BAK1	152	477	540	350	568	232	376
AACAAGAAAGAGGAGCGCGG	NKX3-2_AACAAGAAAGAGGAGCGCGG	NKX3-2	578	227	189	226	154	276	83
CCGGTACCAGAACAGCTGCG	NKX3-2_CCGGTACCAGAACAGCTGCG	NKX3-2	421	496	466	310	314	2476	394
CGGACACGTGTGCACCTCTG	NKX3-2_CGGACACGTGTGCACCTCTG	NKX3-2	795	1198	1313	970	1028	612	1062
GGCTCAAGGATCCCCCCGCA	NKX3-2_GGCTCAAGGATCCCCCCGCA	NKX3-2	174	247	283	228	417	146	169
ATGTCCAGTGTGTTACACCC	BARD1_ATGTCCAGTGTGTTACACCC	BARD1	886	387	598	665	1025	350	154
GACTGGAAAGTCTATTGTGA	BARD1_GACTGGAAAGTCTATTGTGA	BARD1	78	538	221	492	251	1280	253
GCTGTGAAAAGAAATCATAG	BARD1_GCTGTGAAAAGAAATCATAG	BARD1	243	72	118	129	208	15	60
GTAAAGTTGGTGGTACATCA	BARD1_GTAAAGTTGGTGGTACATCA	BARD1	475	683	603	1001	919	1855	559
AGTAGAAAAGGGCGACAACC	BAX_AGTAGAAAAGGGCGACAACC	BAX	1371	1326	1286	1091	1041	1196	425
GGACGAACTGGACAGTAACA	BAX_GGACGAACTGGACAGTAACA	BAX	1463	1311	1484	1043	1838	809	700
GTTTCATCCAGGATCGAGCA	BAX_GTTTCATCCAGGATCGAGCA	BAX	551	477	508	352	504	180	488
TCGGAAAAAGACCTCTCGGG	BAX_TCGGAAAAAGACCTCTCGGG	BAX	310	280	194	236	268	114	115
AGCGCTGGCAGATTTACATG	BBS1_AGCGCTGGCAGATTTACATG	BBS1	556	505	1038	333	627	145	831
CAGAAACCTCTAGGAAGACG	BBS1_CAGAAACCTCTAGGAAGACG	BBS1	373	160	190	286	257	203	109
GCTGGAGCTAAGTGAAATGG	BBS1_GCTGGAGCTAAGTGAAATGG	BBS1	607	311	587	348	562	199	171
TCTTATACACATAGACACAA	BBS1_TCTTATACACATAGACACAA	BBS1	136	257	389	417	294	504	28
AGAGAAACATCAGATTCCAG	BBS2_AGAGAAACATCAGATTCCAG	BBS2	8	257	283	283	295	303	102
ATTGGCCAGTCCACTGAACG	BBS2_ATTGGCCAGTCCACTGAACG	BBS2	119	354	261	155	236	10	87
TGCTCGAAGTGACCGAACTG	BBS2_TGCTCGAAGTGACCGAACTG	BBS2	639	993	925	410	545	793	1591
TTGCCACCAATAATCGCAAG	BBS2_TTGCCACCAATAATCGCAAG	BBS2	569	193	206	228	372	15	63
AAATAGGAAACTCTGGAGCT	BBS4_AAATAGGAAACTCTGGAGCT	BBS4	201	178	258	174	239	235	55
GCTGCATGGTCAAATGGACA	BBS4_GCTGCATGGTCAAATGGACA	BBS4	34	366	234	322	177	1155	316
GGCAACATCAAAGTCCCCGT	BBS4_GGCAACATCAAAGTCCCCGT	BBS4	47	235	210	258	253	479	276
TTGAGGTTATCAGCACTCTG	BBS4_TTGAGGTTATCAGCACTCTG	BBS4	0	239	346	251	269	406	30
ACCTCAGTTCCAATGAATGT	BCAT1_ACCTCAGTTCCAATGAATGT	BCAT1	314	247	357	275	329	198	294
CACGGATCATATGCTGACGG	BCAT1_CACGGATCATATGCTGACGG	BCAT1	259	206	212	183	167	353	378
GTTTCAGCCAAACCTCAACA	BCAT1_GTTTCAGCCAAACCTCAACA	BCAT1	1089	671	876	660	762	850	1159
TTGAAAAATAAGGTCCCACT	BCAT1_TTGAAAAATAAGGTCCCACT	BCAT1	399	483	401	605	428	251	201
AAATGTCTTCCCAAACACCA	BCAT2_AAATGTCTTCCCAAACACCA	BCAT2	797	1091	1380	1089	1092	3029	586
ACGAACAGGAGCGCGCGCGT	BCAT2_ACGAACAGGAGCGCGCGCGT	BCAT2	1535	1246	865	840	787	1033	499
GGTCGGGCCCATACAGCCAG	BCAT2_GGTCGGGCCCATACAGCCAG	BCAT2	567	1096	821	796	934	1676	275
TCGGCAACTACAAGTTAGGT	BCAT2_TCGGCAACTACAAGTTAGGT	BCAT2	235	518	501	557	533	795	753
AGTAAACTTTGGTCCGACCG	BCHE_AGTAAACTTTGGTCCGACCG	BCHE	213	557	548	369	552	434	26
AGTGTCAATGAACTATAGGG	BCHE_AGTGTCAATGAACTATAGGG	BCHE	367	293	320	196	274	269	96
GATATAAACAGTCTTCACTG	BCHE_GATATAAACAGTCTTCACTG	BCHE	702	310	555	380	678	355	127
TTGAATCGAAGTCTACCAAG	BCHE_TTGAATCGAAGTCTACCAAG	BCHE	504	551	543	478	558	263	492
CATCTGTTACTTCGGCGAGG	BCKDHA_CATCTGTTACTTCGGCGAGG	BCKDHA	731	535	645	480	432	472	82
CATGACACTGCTTAACACCA	BCKDHA_CATGACACTGCTTAACACCA	BCKDHA	763	931	1161	832	672	2352	482
CTTATCTATAAACTCCGCCG	BCKDHA_CTTATCTATAAACTCCGCCG	BCKDHA	340	304	398	264	317	860	156
GGGCCATGAATAGTTCCAGG	BCKDHA_GGGCCATGAATAGTTCCAGG	BCKDHA	622	499	587	417	446	59	274
AATTCCTTGTTCACACAATG	BCKDHB_AATTCCTTGTTCACACAATG	BCKDHB	1097	714	819	803	652	790	743
CAAGTATCGCTATCGCTCTG	BCKDHB_CAAGTATCGCTATCGCTCTG	BCKDHB	650	546	733	644	571	207	322
GGCCGCATCCTCGACAGTCG	BCKDHB_GGCCGCATCCTCGACAGTCG	BCKDHB	242	386	390	245	385	185	16
TTTGGCCAATGAGTTATCCA	BCKDHB_TTTGGCCAATGAGTTATCCA	BCKDHB	506	903	702	894	492	959	388
AGAGGCCACGAACATGCAAG	CCND1_AGAGGCCACGAACATGCAAG	CCND1	973	937	959	1057	721	486	1127
CGTGCCTCCGTAGGTCTGCG	CCND1_CGTGCCTCCGTAGGTCTGCG	CCND1	677	632	422	448	607	1129	875
GGTTGGCATCGGGGTACGCG	CCND1_GGTTGGCATCGGGGTACGCG	CCND1	406	432	411	333	365	88	271
GTGTTCAATGAAATCGTGCG	CCND1_GTGTTCAATGAAATCGTGCG	CCND1	89	603	450	573	306	391	254
CTGACGCCCTTCACCGCGCG	BCL2_CTGACGCCCTTCACCGCGCG	BCL2	103	487	345	356	300	324	36
GGCCTTCTTTGAGTTCGGTG	BCL2_GGCCTTCTTTGAGTTCGGTG	BCL2	380	184	302	260	295	14	133
TGGACATCTCGGCGAAGTCG	BCL2_TGGACATCTCGGCGAAGTCG	BCL2	277	645	595	571	423	645	190
TGTCGCAGAGGGGCTACGAG	BCL2_TGTCGCAGAGGGGCTACGAG	BCL2	72	194	378	238	452	522	26
AACACTATTCAACCAAGTGA	BCL2A1_AACACTATTCAACCAAGTGA	BCL2A1	906	1104	957	974	983	1059	498
CTTATAGGTATCCACATCCG	BCL2A1_CTTATAGGTATCCACATCCG	BCL2A1	433	612	637	676	550	987	773
GAAGACGGCATCATTAACTG	BCL2A1_GAAGACGGCATCATTAACTG	BCL2A1	562	1001	987	728	814	1758	263
GTCCTACAGATACCACAACC	BCL2A1_GTCCTACAGATACCACAACC	BCL2A1	1214	870	1054	794	670	314	1455
CAGGCGACGAGTTTGAACTG	BCL2L1_CAGGCGACGAGTTTGAACTG	BCL2L1	1108	2	3	0	5	0	0
CAGTGGCTCCATTCACCGCG	BCL2L1_CAGTGGCTCCATTCACCGCG	BCL2L1	137	3	4	2	0	0	0
CTCCGATTCAGTCCCTTCTG	BCL2L1_CTCCGATTCAGTCCCTTCTG	BCL2L1	170	52	78	49	53	0	216
GACCCCAGTTTACCCCATCC	BCL2L1_GACCCCAGTTTACCCCATCC	BCL2L1	948	2	0	0	0	0	0
ACTTTGTAGGTTATAAGCTG	BCL2L2_ACTTTGTAGGTTATAAGCTG	BCL2L2	654	597	597	541	694	278	440
AGACAAAGAAGGCTACAAGG	BCL2L2_AGACAAAGAAGGCTACAAGG	BCL2L2	399	477	686	712	390	832	284
AGCCCAACAACGCTTCACCC	BCL2L2_AGCCCAACAACGCTTCACCC	BCL2L2	1344	1149	1666	1005	1436	1076	501
GTGTGCTGAGAGTGTCAACA	BCL2L2_GTGTGCTGAGAGTGTCAACA	BCL2L2	832	927	1339	930	1100	545	1046
CAGGTTCACCAGAGGAAACG	BCL3_CAGGTTCACCAGAGGAAACG	BCL3	456	614	473	533	492	149	192
CGGTGCCGACATCGACGCAG	BCL3_CGGTGCCGACATCGACGCAG	BCL3	1152	485	792	504	906	654	536
CTGGAGGCCCGCAATTATGA	BCL3_CTGGAGGCCCGCAATTATGA	BCL3	592	1076	1051	1085	1195	1570	653
GATCACCACATTACCGTCTG	BCL3_GATCACCACATTACCGTCTG	BCL3	627	767	743	848	1051	230	326
AAGTGATATGCACTACAGTG	BCL6_AAGTGATATGCACTACAGTG	BCL6	812	759	1005	755	1167	712	955
CAAGACATCATGGCCTATCG	BCL6_CAAGACATCATGGCCTATCG	BCL6	905	551	769	672	738	400	172
CATCTGCAGGTACATAGCCG	BCL6_CATCTGCAGGTACATAGCCG	BCL6	913	395	646	568	703	542	699
TCCCTCACCTGCAGGCCATG	BCL6_TCCCTCACCTGCAGGCCATG	BCL6	958	850	539	976	463	918	968
ATACTCACGTCATCAACCTT	BCL7A_ATACTCACGTCATCAACCTT	BCL7A	307	1202	1477	1011	1075	6149	1377
TCGTAGGGATGTGTCACCAA	BCL7A_TCGTAGGGATGTGTCACCAA	BCL7A	397	579	612	448	445	901	879
TGATATCAAGAGGGTCATGG	BCL7A_TGATATCAAGAGGGTCATGG	BCL7A	367	484	530	385	568	3470	445
TGGCTCAGAGGTGACCACTC	BCL7A_TGGCTCAGAGGTGACCACTC	BCL7A	914	1115	1085	688	697	2066	429
AGGTTTCGGATCATTCCGAA	BCL9_AGGTTTCGGATCATTCCGAA	BCL9	533	517	773	493	657	411	541
ATGCTGAAATTACGCCCAGG	BCL9_ATGCTGAAATTACGCCCAGG	BCL9	658	1030	1136	1005	1382	1474	1429
CGGGAGTCATATGGTCAAGG	BCL9_CGGGAGTCATATGGTCAAGG	BCL9	481	596	900	892	781	1914	817
TCTCTGATCAAAGGAGTCGG	BCL9_TCTCTGATCAAAGGAGTCGG	BCL9	0	0	0	0	0	0	0
ATTCTTCCACCGTGTACTCG	TNFRSF17_ATTCTTCCACCGTGTACTCG	TNFRSF17	1268	1526	1333	1045	1217	651	1087
GAAGAACATCGAAGTTGACA	TNFRSF17_GAAGAACATCGAAGTTGACA	TNFRSF17	1320	1065	955	1088	1131	2143	492
TAACGCTGACATGTTAGAGG	TNFRSF17_TAACGCTGACATGTTAGAGG	TNFRSF17	708	862	934	715	910	1201	349
TAATTAGGATCAGGTCTCCT	TNFRSF17_TAATTAGGATCAGGTCTCCT	TNFRSF17	761	630	1267	651	1061	199	447
AGTACAGTTCACTCCACGAG	HCN2_AGTACAGTTCACTCCACGAG	HCN2	664	721	843	778	715	587	971
CACGTTGAACACGATCCACG	HCN2_CACGTTGAACACGATCCACG	HCN2	403	68	135	78	120	185	74
GGTGACTACATCATCCGCGA	HCN2_GGTGACTACATCATCCGCGA	HCN2	494	215	306	300	347	225	40
TCTGCGCACGTGGTTCGTGG	HCN2_TCTGCGCACGTGGTTCGTGG	HCN2	459	205	403	206	332	241	408
ACCACGTATAGGACTCGCTG	OPN1SW_ACCACGTATAGGACTCGCTG	OPN1SW	1170	1131	845	995	1187	728	665
CCACAGGTCTGGTTACAGGA	OPN1SW_CCACAGGTCTGGTTACAGGA	OPN1SW	1073	1612	1599	1402	1363	1482	1447
CTGAAGCGGAAGTTGCCGAA	OPN1SW_CTGAAGCGGAAGTTGCCGAA	OPN1SW	1030	612	614	515	644	241	499
GACGAAGTATCCGTTACAGC	OPN1SW_GACGAAGTATCCGTTACAGC	OPN1SW	144	414	488	364	473	2961	236
AACTCCGTAGTTGTCCACGA	BCR_AACTCCGTAGTTGTCCACGA	BCR	354	266	518	204	672	97	157
ATGAGGAGATCACACCCCGA	BCR_ATGAGGAGATCACACCCCGA	BCR	207	352	396	336	176	95	256
GCAATCCTCAAAACTCCGGG	BCR_GCAATCCTCAAAACTCCGGG	BCR	448	284	282	297	267	156	262
TCCCCACAGAGGGCGAACAA	BCR_TCCCCACAGAGGGCGAACAA	BCR	377	225	597	208	408	49	791
AATTCATCGATAACCCCAAG	BCS1L_AATTCATCGATAACCCCAAG	BCS1L	854	44	17	256	343	18	53
AGATGATAGACTTGCAGACG	BCS1L_AGATGATAGACTTGCAGACG	BCS1L	879	45	55	229	265	8	21
CAGAATTCAGTGGTCGCCGG	BCS1L_CAGAATTCAGTGGTCGCCGG	BCS1L	105	0	18	150	153	0	7
GGTACGAAGTCTCGACACTG	BCS1L_GGTACGAAGTCTCGACACTG	BCS1L	257	15	8	186	132	11	14
CCGTCGGACTTATGCCAGTG	BDH1_CCGTCGGACTTATGCCAGTG	BDH1	196	483	494	426	394	259	795
CGGCATCTCAACGTTCGGGG	BDH1_CGGCATCTCAACGTTCGGGG	BDH1	121	387	364	315	303	715	401
CTTTCTCCCCCTCATCCGAA	BDH1_CTTTCTCCCCCTCATCCGAA	BDH1	408	337	331	195	332	465	47
GTACTGCATCACCAAGTTCG	BDH1_GTACTGCATCACCAAGTTCG	BDH1	1206	962	855	959	1030	293	181
AAGAAGACGATCGCAGCCAG	BDKRB1_AAGAAGACGATCGCAGCCAG	BDKRB1	405	228	407	444	348	167	1101
ATGGATCGCAGCAGGAATGT	BDKRB1_ATGGATCGCAGCAGGAATGT	BDKRB1	642	1144	1145	996	1256	1105	977
CCTCTGCCGTGTCATCAACG	BDKRB1_CCTCTGCCGTGTCATCAACG	BDKRB1	339	870	1044	666	724	716	483
GCCACGTTCAGTTGCCGCCG	BDKRB1_GCCACGTTCAGTTGCCGCCG	BDKRB1	198	360	281	314	270	667	396
AGATAATGGCATTCACCACG	BDKRB2_AGATAATGGCATTCACCACG	BDKRB2	1247	1600	1602	1115	1397	1889	603
CCAGAGCAAATGCCCCCAAG	BDKRB2_CCAGAGCAAATGCCCCCAAG	BDKRB2	1192	365	567	543	441	117	160
TGAAAACCATGTCCATGGGC	BDKRB2_TGAAAACCATGTCCATGGGC	BDKRB2	767	769	719	627	594	1097	831
TGGGTAGCTGATGACACAAG	BDKRB2_TGGGTAGCTGATGACACAAG	BDKRB2	434	739	922	478	633	1087	634
CATGTACGACACCCCTCAAG	CFB_CATGTACGACACCCCTCAAG	CFB	637	353	435	296	421	405	208
TATGACGGTTACACTCTCCG	CFB_TATGACGGTTACACTCTCCG	CFB	254	253	200	199	121	5	0
TCTGCAGGATTGCACAACAT	CFB_TCTGCAGGATTGCACAACAT	CFB	284	428	470	409	343	558	59
TGTCTGATCCATCTAGCACC	CFB_TGTCTGATCCATCTAGCACC	CFB	1131	437	716	470	540	475	660
CAGCATCCATTGTGACGAGT	BFSP1_CAGCATCCATTGTGACGAGT	BFSP1	336	248	345	343	305	509	105
CCCTCCCCAAGAATGTTCCA	BFSP1_CCCTCCCCAAGAATGTTCCA	BFSP1	743	852	1096	904	921	423	209
TCTCGATGATACGATGATAC	BFSP1_TCTCGATGATACGATGATAC	BFSP1	0	0	0	0	0	0	0
TCTGCAAGATGATATCAGTG	BFSP1_TCTGCAAGATGATATCAGTG	BFSP1	44	329	398	179	317	1387	298
CATTGATACAGGTAGCGCCT	BGLAP_CATTGATACAGGTAGCGCCT	BGLAP	375	438	261	333	319	771	109
CGGCCAGGGCCAATAGGGCG	BGLAP_CGGCCAGGGCCAATAGGGCG	BGLAP	817	524	749	577	693	447	590
CTGGCCAGCGATGCAAAGTG	BGLAP_CTGGCCAGCGATGCAAAGTG	BGLAP	529	1152	1240	1005	933	438	903
GCTACCTGTATCAATGGCTG	BGLAP_GCTACCTGTATCAATGGCTG	BGLAP	415	526	485	409	501	307	809
AAGCTGACTGGCATCCCCAA	BGN_AAGCTGACTGGCATCCCCAA	BGN	341	433	542	376	363	940	272
AGCACTGAACCACCCGCAGG	BGN_AGCACTGAACCACCCGCAGG	BGN	863	668	895	512	1023	887	2101
CGACATCTCCGAGCTCCGCA	BGN_CGACATCTCCGAGCTCCGCA	BGN	315	656	521	644	360	534	357
GCCATTCATGATGAACGATG	BGN_GCCATTCATGATGAACGATG	BGN	406	374	347	276	566	132	39
ACCCCAGGGCCCGCAAACAG	CEACAM1_ACCCCAGGGCCCGCAAACAG	CEACAM1	243	695	817	639	847	246	735
CAGTGACTGAGTTATTGGCG	CEACAM1_CAGTGACTGAGTTATTGGCG	CEACAM1	350	794	586	609	717	431	212
GAATGTTCCATTGATAAGCC	CEACAM1_GAATGTTCCATTGATAAGCC	CEACAM1	413	397	614	454	403	305	91
TGCCATTCAATGTTGCAGAG	CEACAM1_TGCCATTCAATGTTGCAGAG	CEACAM1	384	502	401	377	348	194	45
AAGAGGGGCTACGTAAAGGC	BHMT_AAGAGGGGCTACGTAAAGGC	BHMT	519	306	689	434	638	1011	1311
GATAGCATCCGGTAAACCTG	BHMT_GATAGCATCCGGTAAACCTG	BHMT	293	330	374	212	350	87	62
TCAGGAGTGTGGTAAGCCAA	BHMT_TCAGGAGTGTGGTAAGCCAA	BHMT	274	599	336	440	339	88	105
TGACGTTTGAGCCAGCTCTG	BHMT_TGACGTTTGAGCCAGCTCTG	BHMT	554	633	804	411	778	526	972
ACCCCGCCTGGCTAATCGTG	BICD1_ACCCCGCCTGGCTAATCGTG	BICD1	1040	1541	1724	1352	1417	1800	1185
AGATGGACTCAAATTTGCCG	BICD1_AGATGGACTCAAATTTGCCG	BICD1	1310	860	1012	825	771	937	640
ATACAGGGTGGCAGTAACTG	BICD1_ATACAGGGTGGCAGTAACTG	BICD1	366	677	505	673	436	1697	434
ATGTACAGGCAGAAAACGAG	BICD1_ATGTACAGGCAGAAAACGAG	BICD1	775	1328	1458	1248	1149	937	393
ACATCATCCGGAATATTGCC	BID_ACATCATCCGGAATATTGCC	BID	540	1182	1234	1162	931	831	323
CAACAACGGTTCCAGCCTCA	BID_CAACAACGGTTCCAGCCTCA	BID	1412	2549	2478	1872	1941	3418	1812
CAGGAACACCAGCCGGTCGG	BID_CAGGAACACCAGCCGGTCGG	BID	430	869	946	783	734	1899	730
TGGGAAGAATAGAGGCAGGT	BID_TGGGAAGAATAGAGGCAGGT	BID	53	760	899	552	824	1931	1652
AAGAATCGAAGTCCTCCATA	BIK_AAGAATCGAAGTCCTCCATA	BIK	329	563	805	659	721	454	237
CCAAGAACCTCCATGGTCGG	BIK_CCAAGAACCTCCATGGTCGG	BIK	736	445	574	382	402	141	146
GCAGTGACGCATTGGCCCTG	BIK_GCAGTGACGCATTGGCCCTG	BIK	640	613	926	377	824	305	173
TTTCATCTACGACCAGACTG	BIK_TTTCATCTACGACCAGACTG	BIK	789	1125	900	696	869	748	1222
AGGATGCGGATATGACTCTG	PRDM1_AGGATGCGGATATGACTCTG	PRDM1	117	542	440	371	506	142	299
GGACGCGTTCAAGTAAGCGT	PRDM1_GGACGCGTTCAAGTAAGCGT	PRDM1	311	509	402	453	255	270	143
GGGGAGCGAGTGATGTACGT	PRDM1_GGGGAGCGAGTGATGTACGT	PRDM1	435	534	298	347	212	359	542
TTTGGACAGATCTATTCCAG	PRDM1_TTTGGACAGATCTATTCCAG	PRDM1	549	323	393	397	282	87	264
ACTCGGGCCACAAAGTTACT	BLK_ACTCGGGCCACAAAGTTACT	BLK	249	600	980	468	796	475	372
CAGGTCCCGATCATTCATAG	BLK_CAGGTCCCGATCATTCATAG	BLK	381	272	331	269	282	180	66
GCTGGTCCGACTCTACGCAG	BLK_GCTGGTCCGACTCTACGCAG	BLK	0	225	228	172	204	254	24
GCTTCTTGCTCCAATCAACA	BLK_GCTTCTTGCTCCAATCAACA	BLK	462	386	701	477	764	1140	253
CCAACACCACAAATCAGCAA	BLM_CCAACACCACAAATCAGCAA	BLM	323	395	448	529	428	1037	357
CGTGCAACAACTTACACCTG	BLM_CGTGCAACAACTTACACCTG	BLM	63	146	39	212	351	25	4
GCCTATCAACCCATCAAGGA	BLM_GCCTATCAACCCATCAAGGA	BLM	949	96	140	155	308	55	103
TCTACGATAAGTGATCTCAA	BLM_TCTACGATAAGTGATCTCAA	BLM	317	95	52	175	187	5	8
ACTTAAGCAATATGGTTGGA	BLMH_ACTTAAGCAATATGGTTGGA	BLMH	903	695	591	595	912	212	306
GAGAATTCTGTATACGACTG	BLMH_GAGAATTCTGTATACGACTG	BLMH	186	201	243	308	410	173	355
TATTAACAAGCATATCCCAT	BLMH_TATTAACAAGCATATCCCAT	BLMH	563	253	559	396	828	202	198
TCCACCAGAGACATTCACCT	BLMH_TCCACCAGAGACATTCACCT	BLMH	320	385	832	287	698	1026	222
ATCTCTGCCCTGCCACAGAG	CXCR5_ATCTCTGCCCTGCCACAGAG	CXCR5	508	591	613	433	501	69	217
CTCCCGATTCCTCTACCATG	CXCR5_CTCCCGATTCCTCTACCATG	CXCR5	298	538	528	258	317	280	95
GTGGAACAGGAAGGTCTCCG	CXCR5_GTGGAACAGGAAGGTCTCCG	CXCR5	425	344	284	287	190	2328	41
TCTTGGGAGAAGGTGCAACG	CXCR5_TCTTGGGAGAAGGTGCAACG	CXCR5	38	396	603	301	449	188	244
AGAGGAGCGACCCTTTCAGC	BLVRA_AGAGGAGCGACCCTTTCAGC	BLVRA	590	250	349	269	248	696	92
GCATGTTGAACTCTTGATGG	BLVRA_GCATGTTGAACTCTTGATGG	BLVRA	530	632	400	437	224	313	156
GTGTCATGGGGTATTCCACA	BLVRA_GTGTCATGGGGTATTCCACA	BLVRA	381	730	661	527	416	626	363
TGATTGGCTTCGTGTCGAGG	BLVRA_TGATTGGCTTCGTGTCGAGG	BLVRA	131	688	787	421	496	345	609
AACATCTCCCACTACCACGT	BLVRB_AACATCTCCCACTACCACGT	BLVRB	242	360	334	501	415	3888	22
ATGATCCCACCACCCACCCG	BLVRB_ATGATCCCACCACCCACCCG	BLVRB	548	473	613	569	416	377	125
ATGTGGACAAGACCGTGGCT	BLVRB_ATGTGGACAAGACCGTGGCT	BLVRB	99	365	603	292	345	155	98
CGAGGGCGCCCGGAACATTG	BLVRB_CGAGGGCGCCCGGAACATTG	BLVRB	325	117	218	131	224	30	176
AATGACCCTATCAGTGCAGG	BNC1_AATGACCCTATCAGTGCAGG	BNC1	383	790	711	611	544	680	946
ACTCAATTACTGATTCACGA	BNC1_ACTCAATTACTGATTCACGA	BNC1	350	523	730	651	423	272	146
GTACCTGCAGTACGTATCCA	BNC1_GTACCTGCAGTACGTATCCA	BNC1	557	635	920	440	460	130	1053
TGCATTGGTCACACTGACGG	BNC1_TGCATTGGTCACACTGACGG	BNC1	770	779	838	672	509	272	85
AATGGCTCTAATGAAGATAG	BMI1_AATGGCTCTAATGAAGATAG	BMI1	159	472	154	395	253	1321	196
CTCCACAAAGCACACACATC	BMI1_CTCCACAAAGCACACACATC	BMI1	511	406	456	319	393	405	129
GATTGATGTCATGTATGAGG	BMI1_GATTGATGTCATGTATGAGG	BMI1	145	419	449	172	291	110	480
TTCTCTTTATTAGATTGGAT	BMI1_TTCTCTTTATTAGATTGGAT	BMI1	315	302	387	402	470	60	108
AGCAGGCTGTGGATCTCAGA	BMP1_AGCAGGCTGTGGATCTCAGA	BMP1	347	390	406	346	333	183	287
CTGTGCCTACGACTATCTGG	BMP1_CTGTGCCTACGACTATCTGG	BMP1	486	759	646	886	527	621	305
GTAGCCATTGGGGTATTCAG	BMP1_GTAGCCATTGGGGTATTCAG	BMP1	134	287	197	386	300	48	67
TCTCACGAACGATGGAAACG	BMP1_TCTCACGAACGATGGAAACG	BMP1	0	0	0	0	0	0	0
AGTCCACCGCATCACAGCGG	BMP2_AGTCCACCGCATCACAGCGG	BMP2	423	338	435	322	387	262	309
GGGCCGCAGGAAGTTCGCGG	BMP2_GGGCCGCAGGAAGTTCGCGG	BMP2	446	534	613	730	545	324	397
TACAGGTCTAGCATGTAGGG	BMP2_TACAGGTCTAGCATGTAGGG	BMP2	417	94	206	209	203	5	444
TGAGGTGATAAACTCCTCCG	BMP2_TGAGGTGATAAACTCCTCCG	BMP2	181	372	372	571	310	142	163
AGTGTGGTATCAAGCTTACA	BMP3_AGTGTGGTATCAAGCTTACA	BMP3	1533	986	1455	1323	1128	3040	2178
CTCCAGACACTGGACAACTC	BMP3_CTCCAGACACTGGACAACTC	BMP3	856	855	981	822	1069	358	753
GAGGAAGAAGCGCTCTACTG	BMP3_GAGGAAGAAGCGCTCTACTG	BMP3	510	1012	1600	1055	1310	726	839
TATCACTCAACTCTTGAGGA	BMP3_TATCACTCAACTCTTGAGGA	BMP3	580	1126	1002	1025	1011	1238	577
ATTAGCCGATCGTTACCTCA	BMP4_ATTAGCCGATCGTTACCTCA	BMP4	1137	685	766	546	575	454	1242
CCTCATAAATGTTTATACGG	BMP4_CCTCATAAATGTTTATACGG	BMP4	311	177	214	255	168	350	469
GGGAGAAGCAGCCAAACTAT	BMP4_GGGAGAAGCAGCCAAACTAT	BMP4	543	826	849	637	1029	745	626
TGGTCCACCACAATGTGACA	BMP4_TGGTCCACCACAATGTGACA	BMP4	631	885	760	633	580	1050	425
AAAGGCCCAAGCTTTAGATG	BMP5_AAAGGCCCAAGCTTTAGATG	BMP5	476	993	1344	997	1225	1493	1092
AGCTGAATTCCGGATATACA	BMP5_AGCTGAATTCCGGATATACA	BMP5	778	747	752	979	939	685	497
CGAGATAACTGTATGCGACG	BMP5_CGAGATAACTGTATGCGACG	BMP5	725	741	605	774	563	628	255
CTAGTGGGTTATGCAAAAGG	BMP5_CTAGTGGGTTATGCAAAAGG	BMP5	244	771	859	542	1052	282	613
GGCGCGGACTTCAGTCGCCC	BMP6_GGCGCGGACTTCAGTCGCCC	BMP6	277	233	209	164	161	37	95
GTGACTCCACAGCATAACAT	BMP6_GTGACTCCACAGCATAACAT	BMP6	665	372	398	233	526	44	78
TCTACAAGGACTGTGTTATG	BMP6_TCTACAAGGACTGTGTTATG	BMP6	95	377	229	314	299	247	310
TCTTATAGTGGAGTACGACA	BMP6_TCTTATAGTGGAGTACGACA	BMP6	1098	204	234	396	306	102	191
ACCACTGGGTGGTCAATCCG	BMP7_ACCACTGGGTGGTCAATCCG	BMP7	311	147	388	222	389	202	65
CAAACCGGAACTCTCGATGG	BMP7_CAAACCGGAACTCTCGATGG	BMP7	653	761	1284	598	1107	509	922
TACAGGTCCAGCATGAACAT	BMP7_TACAGGTCCAGCATGAACAT	BMP7	509	623	1051	676	645	1288	1666
TGACCATGTCGGCGTCGGTG	BMP7_TGACCATGTCGGCGTCGGTG	BMP7	130	343	276	174	210	339	98
CATGGCCGGCGACGACGACG	BMP8B_CATGGCCGGCGACGACGACG	BMP8B	338	337	291	255	299	56	961
CGGTGCTCGGGCTGCCTGGG	BMP8B_CGGTGCTCGGGCTGCCTGGG	BMP8B	309	769	876	600	813	151	390
CTGAAGCGTCACAAGGACCT	BMP8B_CTGAAGCGTCACAAGGACCT	BMP8B	1132	574	600	572	467	22	171
GTCATGAGCTTCGTTAACAT	BMP8B_GTCATGAGCTTCGTTAACAT	BMP8B	384	447	575	552	735	1300	353
ATAGCACTTTAAAAAAGGCA	BMPR1A_ATAGCACTTTAAAAAAGGCA	BMPR1A	465	838	851	754	904	284	300
ATGGCGTGGCGAAAAAGTGG	BMPR1A_ATGGCGTGGCGAAAAAGTGG	BMPR1A	451	372	657	321	703	567	333
CAACTGGACAGGTTTCATAG	BMPR1A_CAACTGGACAGGTTTCATAG	BMPR1A	611	402	332	408	374	80	504
TAACCTACCTATGACAACAG	BMPR1A_TAACCTACCTATGACAACAG	BMPR1A	363	387	321	337	296	18	186
CATTGATTTAGCGTCTAGGG	BMPR1B_CATTGATTTAGCGTCTAGGG	BMPR1B	338	402	592	360	665	535	534
GATTGGAAAAGGTCGCTATG	BMPR1B_GATTGGAAAAGGTCGCTATG	BMPR1B	336	635	794	735	729	1263	823
TCTAACCCAATGCTGTATCG	BMPR1B_TCTAACCCAATGCTGTATCG	BMPR1B	319	382	563	339	492	490	103
TGATGGACCTATACACCACA	BMPR1B_TGATGGACCTATACACCACA	BMPR1B	1083	673	1107	584	862	1849	640
AGCAACTGGACGCTCATCCA	BMPR2_AGCAACTGGACGCTCATCCA	BMPR2	1552	1646	1404	926	1239	4177	1321
CAGCACACCTTTGACTATAG	BMPR2_CAGCACACCTTTGACTATAG	BMPR2	1021	751	835	753	1035	460	814
CCTTTGGGAGAAATCAAAAG	BMPR2_CCTTTGGGAGAAATCAAAAG	BMPR2	456	279	312	110	325	171	221
GTGACTTTGGACTGTCCATG	BMPR2_GTGACTTTGGACTGTCCATG	BMPR2	330	502	502	363	445	807	142
GGGAAGACTTCCCTGACTGG	BMX_GGGAAGACTTCCCTGACTGG	BMX	1402	1025	1027	1101	877	935	1072
GGGGTTACCCCTTATCTCTG	BMX_GGGGTTACCCCTTATCTCTG	BMX	529	272	216	429	246	99	57
GGTTAGAAATTCGAGCCAAG	BMX_GGTTAGAAATTCGAGCCAAG	BMX	500	813	702	672	697	253	1026
TGTTGGCCTTTGTTGACACA	BMX_TGTTGGCCTTTGTTGACACA	BMX	857	1190	1254	1046	871	1135	677
AGGGAACTGGGATAAGACAG	POLR3D_AGGGAACTGGGATAAGACAG	POLR3D	4	64	65	15	27	0	10
AGGTCCCTGGAACGGATGGA	POLR3D_AGGTCCCTGGAACGGATGGA	POLR3D	645	105	296	251	234	40	33
CCACAGATACATCCTTCGGG	POLR3D_CCACAGATACATCCTTCGGG	POLR3D	0	60	79	41	42	0	0
TCACCCCAAATATCATCAGT	POLR3D_TCACCCCAAATATCATCAGT	POLR3D	260	10	19	71	46	0	0
AGAGATTGTCAAATTTGACC	BNIP1_AGAGATTGTCAAATTTGACC	BNIP1	365	40	136	125	52	0	11
CCAGCAATCAGGCCTCATGG	BNIP1_CCAGCAATCAGGCCTCATGG	BNIP1	464	35	16	69	77	0	3
CCATCACTGAGAGCCTCATG	BNIP1_CCATCACTGAGAGCCTCATG	BNIP1	362	68	177	127	103	7	27
GTTGCGTCACAGAATACAGG	BNIP1_GTTGCGTCACAGAATACAGG	BNIP1	323	10	55	55	59	0	0
AACTCATTACTATTCTCTGA	BNIP2_AACTCATTACTATTCTCTGA	BNIP2	374	281	312	314	230	254	146
CGGGATGTTATCACTTCCGC	BNIP2_CGGGATGTTATCACTTCCGC	BNIP2	234	247	134	242	73	194	121
GGTCTCCACCGCCGACCGAG	BNIP2_GGTCTCCACCGCCGACCGAG	BNIP2	572	125	108	164	116	59	417
TCCAGACATTAGCCTGACAC	BNIP2_TCCAGACATTAGCCTGACAC	BNIP2	362	169	213	289	444	57	146
AAGCGGAGGTCGGAGCGCCG	BNIP3_AAGCGGAGGTCGGAGCGCCG	BNIP3	406	440	306	309	270	216	81
TCTTGTGGTGTCTGCGAGCG	BNIP3_TCTTGTGGTGTCTGCGAGCG	BNIP3	240	654	370	369	342	659	161
TTCAGCAATAATGGGAACGG	BNIP3_TTCAGCAATAATGGGAACGG	BNIP3	622	314	561	138	387	253	79
TTCTGCGACATGGCGCCAGA	BNIP3_TTCTGCGACATGGCGCCAGA	BNIP3	494	525	428	501	478	525	158
CCCGACACACCTGAGAGCTA	BNIP3L_CCCGACACACCTGAGAGCTA	BNIP3L	368	894	1019	524	703	158	806
GTTCATGGGTAGCTCCACCC	BNIP3L_GTTCATGGGTAGCTCCACCC	BNIP3L	340	841	1506	718	974	771	1784
TCAGGACAGAGTAGTTCCAG	BNIP3L_TCAGGACAGAGTAGTTCCAG	BNIP3L	640	535	608	406	387	8	105
TCCTCATCCTCCATCCACAA	BNIP3L_TCCTCATCCTCCATCCACAA	BNIP3L	415	268	545	289	390	145	434
AGGAACGCATCGGTCACCAC	BOK_AGGAACGCATCGGTCACCAC	BOK	1316	1225	1098	1086	1042	939	2154
GCCCAGCGTCTACCGCAACG	BOK_GCCCAGCGTCTACCGCAACG	BOK	1488	1336	1618	904	1606	1864	1784
GCCGGGAGTACGTGCACGCG	BOK_GCCGGGAGTACGTGCACGCG	BOK	1101	883	928	541	882	694	851
GGTGGTGTCCCTGTATGCGG	BOK_GGTGGTGTCCCTGTATGCGG	BOK	203	242	323	296	377	268	176
ATTACAAACAATGACCTACC	DST_ATTACAAACAATGACCTACC	DST	301	344	359	424	353	246	90
CAAAGAAGCTAAAATCAGTG	DST_CAAAGAAGCTAAAATCAGTG	DST	328	264	197	287	228	366	30
GCCAGTGTGTCCGATCACAC	DST_GCCAGTGTGTCCGATCACAC	DST	533	270	234	254	158	174	155
TAGAATTCGAGCTAGCAATG	DST_TAGAATTCGAGCTAGCAATG	DST	330	261	294	501	307	789	36
AGAGACCGGTCGCACAGTCA	FOXL2_AGAGACCGGTCGCACAGTCA	FOXL2	1026	1674	1063	1425	901	2550	377
CCTTGATGAAGCACTCGTTG	FOXL2_CCTTGATGAAGCACTCGTTG	FOXL2	182	461	327	337	316	60	39
GAAGCCCCCGTACTCGTACG	FOXL2_GAAGCCCCCGTACTCGTACG	FOXL2	642	985	1213	949	1092	1025	530
GTAGCGGCCACGAGTTGTTG	FOXL2_GTAGCGGCCACGAGTTGTTG	FOXL2	668	929	1415	1059	1304	2606	1951
AAGAAATCTACAACGACCGG	BPGM_AAGAAATCTACAACGACCGG	BPGM	504	330	265	339	379	102	144
ACTCAACAGCGAAGGAATGG	BPGM_ACTCAACAGCGAAGGAATGG	BPGM	998	770	483	375	492	348	434
CTTGGATCAACTGCCACGGT	BPGM_CTTGGATCAACTGCCACGGT	BPGM	195	391	200	238	166	117	538
GGCCTTGATCGGTCTCAACA	BPGM_GGCCTTGATCGGTCTCAACA	BPGM	335	291	259	200	204	87	4
AGATGCTGTTGATTTGATGA	BPHL_AGATGCTGTTGATTTGATGA	BPHL	399	1209	1077	1285	1003	3107	1188
GAAGACAGCATGATATATGA	BPHL_GAAGACAGCATGATATATGA	BPHL	906	392	559	618	552	372	322
GTGGTCGCCTGGGATCCTCG	BPHL_GTGGTCGCCTGGGATCCTCG	BPHL	93	97	211	188	172	9	208
TGGCCGCCATTACCCGAACG	BPHL_TGGCCGCCATTACCCGAACG	BPHL	523	425	460	355	406	388	173
AGAGGCCCAGGTATACCATG	BPI_AGAGGCCCAGGTATACCATG	BPI	280	365	615	281	543	1387	109
CTGGAAATAAGGTTGCAGCT	BPI_CTGGAAATAAGGTTGCAGCT	BPI	489	183	442	108	300	438	100
GATGACCCTTAGAGATGACA	BPI_GATGACCCTTAGAGATGACA	BPI	340	223	115	158	105	0	206
TCACTGTAAAACTCCCCCTG	BPI_TCACTGTAAAACTCCCCCTG	BPI	286	422	318	573	262	35	11
AAGGAGCCAACATAACAGAT	BRCA1_AAGGAGCCAACATAACAGAT	BRCA1	141	459	662	614	638	222	526
AGAAACCTACAACTCATGGA	BRCA1_AGAAACCTACAACTCATGGA	BRCA1	341	255	335	220	363	65	222
GGCTCAGGGTTACCGAAGAG	BRCA1_GGCTCAGGGTTACCGAAGAG	BRCA1	678	584	563	952	668	298	299
TGGTACTGATTATGGCACTC	BRCA1_TGGTACTGATTATGGCACTC	BRCA1	521	570	553	439	614	730	134
ACAAATGATTAAGTTGACAC	BRAF_ACAAATGATTAAGTTGACAC	BRAF	371	244	200	243	198	209	68
ATACCCAATAGAGTCCGAGG	BRAF_ATACCCAATAGAGTCCGAGG	BRAF	473	365	358	399	258	34	251
GGGGGTAGCAGACAAACCTG	BRAF_GGGGGTAGCAGACAAACCTG	BRAF	403	588	528	525	515	1829	214
TCATAATTAACACACATCAG	BRAF_TCATAATTAACACACATCAG	BRAF	229	303	223	329	392	271	230
AAAATGTCAGACAAGCTCAA	BRCA2_AAAATGTCAGACAAGCTCAA	BRCA2	630	175	246	265	309	262	710
AATTATGGCAGGTTGTTACG	BRCA2_AATTATGGCAGGTTGTTACG	BRCA2	559	381	228	501	397	524	280
AGCACAGTAGAACTAAGGGT	BRCA2_AGCACAGTAGAACTAAGGGT	BRCA2	108	72	148	37	239	8	177
GTCTACCTGACCAATCGATG	BRCA2_GTCTACCTGACCAATCGATG	BRCA2	358	293	429	226	310	528	355
AACTCCCTGGAGATAAACTT	BRDT_AACTCCCTGGAGATAAACTT	BRDT	292	302	261	363	302	167	209
ATGGCCCTTTCAACGTCCTG	BRDT_ATGGCCCTTTCAACGTCCTG	BRDT	451	527	454	254	475	59	258
CAACTCCAGTTCACAAACTG	BRDT_CAACTCCAGTTCACAAACTG	BRDT	590	479	448	493	439	1632	290
TGACGTTGTCAAAAATCCGA	BRDT_TGACGTTGTCAAAAATCCGA	BRDT	565	266	151	213	151	104	26
AAACGGTGCCTGTAAGTACG	ZFP36L1_AAACGGTGCCTGTAAGTACG	ZFP36L1	584	57	66	334	310	2	0
AGGGGCAAAAGCCGATGGTG	ZFP36L1_AGGGGCAAAAGCCGATGGTG	ZFP36L1	535	79	35	68	89	0	13
GCTGTCTCGCGAGCTCAGAG	ZFP36L1_GCTGTCTCGCGAGCTCAGAG	ZFP36L1	226	40	65	66	198	0	0
GGGTGACTGAGTGCCTCCGA	ZFP36L1_GGGTGACTGAGTGCCTCCGA	ZFP36L1	295	104	81	102	307	5	2
CGCCGTTCTCGCTAAACGAG	ZFP36L2_CGCCGTTCTCGCTAAACGAG	ZFP36L2	325	459	626	437	594	433	157
GCTCGGTCTTGTACTTCGGA	ZFP36L2_GCTCGGTCTTGTACTTCGGA	ZFP36L2	508	600	556	439	629	798	671
TCATCCACAACGCGGACGAG	ZFP36L2_TCATCCACAACGCGGACGAG	ZFP36L2	1033	600	739	410	765	151	646
TGCCGGCCCTTCGAGGAGAG	ZFP36L2_TGCCGGCCCTTCGAGGAGAG	ZFP36L2	835	727	953	542	584	490	482
CACAAATAAAGGATGGAGCG	BRS3_CACAAATAAAGGATGGAGCG	BRS3	312	276	524	194	468	181	207
CACCCTGAACATACCTACTG	BRS3_CACCCTGAACATACCTACTG	BRS3	432	513	487	492	400	87	603
GCAACTCACTACCTTGCAGA	BRS3_GCAACTCACTACCTTGCAGA	BRS3	244	626	664	363	586	3287	215
TTGGAGGGCTGTCGCTCAAG	BRS3_TTGGAGGGCTGTCGCTCAAG	BRS3	125	343	425	297	369	85	295
CATCTCCATCGACACGCTCG	BSG_CATCTCCATCGACACGCTCG	BSG	777	1626	1275	1398	1193	1860	758
GGATCGCAACCACCTGACCC	BSG_GGATCGCAACCACCTGACCC	BSG	730	692	750	533	701	961	185
GTCGTCAGAACACATCAACG	BSG_GTCGTCAGAACACATCAACG	BSG	370	71	96	172	249	47	117
GTGGACTCCGACGACCAGTG	BSG_GTGGACTCCGACGACCAGTG	BSG	700	236	465	613	593	101	170
ATAAAAAGGTCATAGTCTGA	BST1_ATAAAAAGGTCATAGTCTGA	BST1	294	356	256	316	310	174	99
CGCTCAGGGGCATAAAACGA	BST1_CGCTCAGGGGCATAAAACGA	BST1	627	848	854	852	617	253	1102
CTGAACCATTCAGCATGACG	BST1_CTGAACCATTCAGCATGACG	BST1	648	855	1031	717	1005	758	199
TGTCGACAGAAAAATGACTC	BST1_TGTCGACAGAAAAATGACTC	BST1	302	411	858	352	372	183	181
CTCTTCTTAGATGGCCCTAA	BST2_CTCTTCTTAGATGGCCCTAA	BST2	395	244	318	280	244	377	236
CTGGATGCAGAGAAGGCCCA	BST2_CTGGATGCAGAGAAGGCCCA	BST2	513	453	491	450	410	64	93
GGCCCAAGGACAAAAGAAAG	BST2_GGCCCAAGGACAAAAGAAAG	BST2	98	112	109	239	133	156	195
GGCTTCCCTGGATGCAGAGA	BST2_GGCTTCCCTGGATGCAGAGA	BST2	44	298	365	257	326	24	14
ACCACACAATCAAAGCGGAA	BTC_ACCACACAATCAAAGCGGAA	BTC	214	242	309	233	244	197	80
AGGACACTCCACTTACACAC	BTC_AGGACACTCCACTTACACAC	BTC	582	253	279	241	195	84	543
AGTAATGCTTGTATTGCTTG	BTC_AGTAATGCTTGTATTGCTTG	BTC	468	496	309	526	305	347	190
TCTAGTGATCCTTCACTGTG	BTC_TCTAGTGATCCTTCACTGTG	BTC	185	190	345	183	435	986	803
ATGTTGTGTACCCAACTGCC	BTD_ATGTTGTGTACCCAACTGCC	BTD	682	794	1045	731	864	617	667
CTGAGTTGTATGGCCATCAG	BTD_CTGAGTTGTATGGCCATCAG	BTD	162	370	326	278	324	669	386
GTACCAAAAGGACTCCAGAG	BTD_GTACCAAAAGGACTCCAGAG	BTD	207	231	307	160	290	181	137
TTTACGGTAGCGGTCAACAA	BTD_TTTACGGTAGCGGTCAACAA	BTD	421	288	244	150	183	157	602
AGGACTCGACCCAGATTCGG	KLF9_AGGACTCGACCCAGATTCGG	KLF9	938	670	821	725	628	1010	359
CCAAGGAGCACGGTGACCCG	KLF9_CCAAGGAGCACGGTGACCCG	KLF9	371	496	375	464	399	236	27
CTTTCCCACAGCCACTGTAG	KLF9_CTTTCCCACAGCCACTGTAG	KLF9	186	874	744	619	788	382	465
GGGTCGCTCCGGACGCCGAG	KLF9_GGGTCGCTCCGGACGCCGAG	KLF9	193	774	862	683	744	278	899
ACTGCAGTGAAACAATTCCA	KLF5_ACTGCAGTGAAACAATTCCA	KLF5	924	587	719	711	867	1379	400
GAAGAACTGGTCTACGACTG	KLF5_GAAGAACTGGTCTACGACTG	KLF5	697	454	483	378	495	383	118
GCTGTCTGATTTGTAGAACT	KLF5_GCTGTCTGATTTGTAGAACT	KLF5	443	494	712	452	698	268	581
GTCTTGATGTGTGTTACGCA	KLF5_GTCTTGATGTGTGTTACGCA	KLF5	823	964	1699	948	1520	2338	1595
AACTGCTCGCAGAAAGAAGA	BTF3_AACTGCTCGCAGAAAGAAGA	BTF3	383	42	66	65	131	66	137
CTGCAGGCACAAGTGCGCAT	BTF3_CTGCAGGCACAAGTGCGCAT	BTF3	1734	9	70	127	192	68	241
TCAGCTGCTTTGTCTCAGCA	BTF3_TCAGCTGCTTTGTCTCAGCA	BTF3	664	65	53	110	230	187	344
TTAGGGGTAAACAATATCTC	BTF3_TTAGGGGTAAACAATATCTC	BTF3	499	39	81	62	58	11	16
AATGGATCCTCTGATTGGAC	BTG1_AATGGATCCTCTGATTGGAC	BTG1	787	1017	925	765	820	2188	640
CTCCAAGTTTCTCCGCACCA	BTG1_CTCCAAGTTTCTCCGCACCA	BTG1	531	488	828	498	494	398	403
GATCTCGCCTATCATGGTGG	BTG1_GATCTCGCCTATCATGGTGG	BTG1	500	519	665	523	401	456	414
TTCTGTAGGACACTTCATAG	BTG1_TTCTGTAGGACACTTCATAG	BTG1	144	401	517	480	530	618	244
ATAAGGAGTTACCGTATCCC	BTK_ATAAGGAGTTACCGTATCCC	BTK	1314	912	659	669	726	227	312
CTGTGTTTGCTAAATCCACA	BTK_CTGTGTTTGCTAAATCCACA	BTK	326	447	422	414	306	538	109
GATGGTAGTTAATGAGCTCA	BTK_GATGGTAGTTAATGAGCTCA	BTK	559	426	866	484	681	291	152
TATGAGTATGACTTTGAACG	BTK_TATGAGTATGACTTTGAACG	BTK	243	322	343	285	421	347	63
ACAGCCACAGCCACTATCCA	BTN1A1_ACAGCCACAGCCACTATCCA	BTN1A1	1239	821	1267	1040	1061	707	1121
CCCGTCCCTATGCACCAGCA	BTN1A1_CCCGTCCCTATGCACCAGCA	BTN1A1	464	451	651	456	639	132	563
TCCAGGACGGCATCGCCAAG	BTN1A1_TCCAGGACGGCATCGCCAAG	BTN1A1	1031	798	1058	757	755	1067	673
TGAACTTGCATACTGATGTG	BTN1A1_TGAACTTGCATACTGATGTG	BTN1A1	105	328	671	493	444	189	1544
CAAGGAGAAGCTTATTCGTG	BUB1_CAAGGAGAAGCTTATTCGTG	BUB1	466	6	46	23	26	0	2
GGTAGCAAAACAGTGTACCC	BUB1_GGTAGCAAAACAGTGTACCC	BUB1	107	44	63	35	83	2	18
TCAGAGAGGAATTCAAAACC	BUB1_TCAGAGAGGAATTCAAAACC	BUB1	261	45	34	65	48	2	0
TGATGAATCTTGGGTCATTG	BUB1_TGATGAATCTTGGGTCATTG	BUB1	300	131	306	358	356	52	850
AAAATGGAGAAAGGTACACT	BUB1B_AAAATGGAGAAAGGTACACT	BUB1B	141	43	57	43	22	9	1
AGGAATTGAACCCTTGAGCG	BUB1B_AGGAATTGAACCCTTGAGCG	BUB1B	326	16	32	31	38	0	14
AGTGAAGCTGTATTGCCACG	BUB1B_AGTGAAGCTGTATTGCCACG	BUB1B	1403	98	196	100	68	0	25
GCAGATGCGATATTTCAGGA	BUB1B_GCAGATGCGATATTTCAGGA	BUB1B	775	5	2	22	25	8	0
GCAACGTCATCTCGTACTCG	BYSL_GCAACGTCATCTCGTACTCG	BYSL	717	165	278	278	289	6	53
GGTTGAGACAGTCATGTCAG	BYSL_GGTTGAGACAGTCATGTCAG	BYSL	42	75	99	86	123	58	49
GTATTATCTAAGTACCGCAG	BYSL_GTATTATCTAAGTACCGCAG	BYSL	144	2	0	98	29	0	0
TCAGGATGGATCAGATGACG	BYSL_TCAGGATGGATCAGATGACG	BYSL	165	85	113	56	53	4	210
GCACGCTCTACTCAGCCATG	TSPO_GCACGCTCTACTCAGCCATG	TSPO	240	450	576	449	562	740	922
GGGGGGCCATGCCCAGTTCA	TSPO_GGGGGGCCATGCCCAGTTCA	TSPO	161	683	673	458	599	837	420
TCTGCAGGCCGGCGTACCAG	TSPO_TCTGCAGGCCGGCGTACCAG	TSPO	756	540	522	355	460	665	888
TGGTGCCCGACAAATGGGCT	TSPO_TGGTGCCCGACAAATGGGCT	TSPO	295	1012	718	756	716	1213	362
ATAATGACAGTCCAACACAA	C1QBP_ATAATGACAGTCCAACACAA	C1QBP	228	25	57	88	216	12	154
ATTAGTGCGGAAAGTTGCCG	C1QBP_ATTAGTGCGGAAAGTTGCCG	C1QBP	930	151	160	609	857	237	63
GCGTGCGCGCAGGTTCCGAG	C1QBP_GCGTGCGCGCAGGTTCCGAG	C1QBP	471	353	284	365	744	302	162
GGCCCGCTAAACCTCACCGT	C1QBP_GGCCCGCTAAACCTCACCGT	C1QBP	0	77	40	69	123	3	35
CTTGGAGAGTCATTCAACAG	SERPING1_CTTGGAGAGTCATTCAACAG	SERPING1	443	338	170	224	258	107	30
GAGCATCCTCTCTTACCCCA	SERPING1_GAGCATCCTCTCTTACCCCA	SERPING1	325	480	451	435	461	43	209
GTTTGCAAGACAGAGGCGAA	SERPING1_GTTTGCAAGACAGAGGCGAA	SERPING1	648	655	614	423	465	899	725
TAAGGGCACCCTTACCACTC	SERPING1_TAAGGGCACCCTTACCACTC	SERPING1	509	781	974	746	622	1497	616
AAGGCCTTAAAGGAGACCAG	C1QA_AAGGCCTTAAAGGAGACCAG	C1QA	639	583	657	456	787	516	280
CCGGCAAGGTGGGCTACCCA	C1QA_CCGGCAAGGTGGGCTACCCA	C1QA	1145	1153	773	578	1114	1379	365
GAAACATCAAGGACCAGCCG	C1QA_GAAACATCAAGGACCAGCCG	C1QA	667	946	1238	977	1112	1563	501
GAACCGTACCAGAACCACTC	C1QA_GAACCGTACCAGAACCACTC	C1QA	49	460	328	368	322	102	177
AACAATTATGAGCCCCGCAG	C1QB_AACAATTATGAGCCCCGCAG	C1QB	604	250	437	242	348	22	334
AGTCTCCCGATTCACCTTTG	C1QB_AGTCTCCCGATTCACCTTTG	C1QB	151	394	658	579	606	110	943
CCTGGGAATCCAGGAAAAGT	C1QB_CCTGGGAATCCAGGAAAAGT	C1QB	191	350	244	193	329	526	1223
GGGCCTAATCGATATCTCCC	C1QB_GGGCCTAATCGATATCTCCC	C1QB	293	259	298	262	204	155	146
ATGGGTACGACGGACTGCCG	C1QC_ATGGGTACGACGGACTGCCG	C1QC	674	776	1820	684	1259	1664	957
CAGGCTGCTACGGGATCCCA	C1QC_CAGGCTGCTACGGGATCCCA	C1QC	604	418	716	521	1094	1034	97
CCAGCCATTCCCGGGATCCG	C1QC_CCAGCCATTCCCGGGATCCG	C1QC	915	338	828	479	800	211	229
GCGGTCCTCACCAACCCGCA	C1QC_GCGGTCCTCACCAACCCGCA	C1QC	71	451	740	608	825	737	89
CACGCACAACTAAACTGTCA	C1S_CACGCACAACTAAACTGTCA	C1S	378	186	347	62	242	258	155
CTGTGCGTATGACTCAGTGC	C1S_CTGTGCGTATGACTCAGTGC	C1S	295	495	385	264	478	318	529
GATGACATGAAGAATTGCGG	C1S_GATGACATGAAGAATTGCGG	C1S	369	310	264	346	259	283	761
TCTTCCAAACTGATCTAACA	C1S_TCTTCCAAACTGATCTAACA	C1S	524	298	296	305	208	182	72
ACAGCTGTGTGTGATAATGG	C2_ACAGCTGTGTGTGATAATGG	C2	708	1571	1618	1371	1594	1092	1254
ACCAGACATCTATGCCATCG	C2_ACCAGACATCTATGCCATCG	C2	755	1054	1004	857	1070	560	582
ACCTTAATAGTGACATGCCA	C2_ACCTTAATAGTGACATGCCA	C2	763	928	935	824	786	897	440
TGCTCACGGGGTCTTCGGAG	C2_TGCTCACGGGGTCTTCGGAG	C2	1099	1373	1490	1095	1261	880	245
ACTGTGCAGTCTCTAACCCA	C3_ACTGTGCAGTCTCTAACCCA	C3	1758	1276	1735	1205	1492	1145	1233
GACATATGGAACGGACAACG	C3_GACATATGGAACGGACAACG	C3	214	510	331	327	199	234	34
GCTGGCACGAGAACCTCATG	C3_GCTGGCACGAGAACCTCATG	C3	703	1054	826	732	948	1429	194
GTAATGCACAGCGATGACCG	C3_GTAATGCACAGCGATGACCG	C3	825	1361	1483	1144	1100	2930	1244
AAAGCATCAGAGTTATCCAG	C3AR1_AAAGCATCAGAGTTATCCAG	C3AR1	279	369	466	420	457	325	164
ACAGACAACCATAATAGATG	C3AR1_ACAGACAACCATAATAGATG	C3AR1	274	159	299	371	318	155	34
TACGAGTCTGAGCTACCACA	C3AR1_TACGAGTCTGAGCTACCACA	C3AR1	0	311	320	214	170	34	33
TGGAGGGGATGAGCTTGCAT	C3AR1_TGGAGGGGATGAGCTTGCAT	C3AR1	104	334	460	258	416	642	367
CAGGCCATGGATCTCCCACG	C4A_CAGGCCATGGATCTCCCACG	C4A	442	388	415	306	527	279	848
GCTCAATAGACAGAAACCCG	C4A_GCTCAATAGACAGAAACCCG	C4A	377	141	158	137	192	28	52
TCCCACAAGCCCCTCAACAT	C4A_TCCCACAAGCCCCTCAACAT	C4A	216	173	387	212	303	58	295
TCCTGTCTAACACTGGACAG	C4A_TCCTGTCTAACACTGGACAG	C4A	445	211	277	150	303	12	434
AGAGTGTCCCCAACACGAGG	C4B_AGAGTGTCCCCAACACGAGG	C4B	207	232	287	169	284	62	210
AGCTACGTCAGGGTTACAGG	C4B_AGCTACGTCAGGGTTACAGG	C4B	589	596	798	429	432	208	184
TCCTATGTATCACTGGAGAG	C4B_TCCTATGTATCACTGGAGAG	C4B	117	296	253	189	227	574	71
TGCCAAGCAGTACCGGAACG	C4B_TGCCAAGCAGTACCGGAACG	C4B	232	326	472	262	399	322	316
AGGCTTACACTTGACAACTG	C4BPA_AGGCTTACACTTGACAACTG	C4BPA	1600	1578	1168	1324	1054	4078	645
AGTCAACGTAATATCCATCG	C4BPA_AGTCAACGTAATATCCATCG	C4BPA	1053	788	876	1037	785	1090	585
ATGGTGAAATCACTCAACAC	C4BPA_ATGGTGAAATCACTCAACAC	C4BPA	490	811	809	805	784	2328	961
GTTTGTAGCCAGGATGACAG	C4BPA_GTTTGTAGCCAGGATGACAG	C4BPA	512	1205	1434	1112	891	969	1121
AATATGCTATTGTCCACTGG	C4BPB_AATATGCTATTGTCCACTGG	C4BPB	650	838	642	775	683	1465	195
AGGTGTGGTCCTCTAGACAC	C4BPB_AGGTGTGGTCCTCTAGACAC	C4BPB	1115	894	769	785	641	606	853
CTTACAGCGGCACTCAGTAG	C4BPB_CTTACAGCGGCACTCAGTAG	C4BPB	193	279	382	309	280	282	181
[truncated: 75,442 more rows]

## Sheet: Fold-change
Gene	Log2FC	FDR ('-Log10 p-value)
KCNJ15	6.8232	3.85078
KCNJ16	6.771	3.85078
TSC2	5.7925	3.85078
MAU2	5.5297	3.85078
PDCD10	5.3877	3.85078
KCTD5	5.0997	3.85078
AP2S1	4.6681	3.85078
NF2	4.6003	3.85078
SMARCA4	4.4383	3.85078
KEAP1	4.3642	3.85078
SMG7	4.2836	3.85078
FRYL	4.1937	3.85078
AP2M1	4.0885	3.85078
CAND1	3.9989	3.85078
DNM2	3.9429	3.85078
PCYT2	3.8673	3.85078
IL6ST	3.6741	3.85078
SMARCB1	3.6348	3.85078
TGFBR1	3.6104	3.85078
ARHGAP29	3.5806	3.85078
HNRNPA1	3.5655	3.85078
SRRD	3.2263	3.85078
RALGAPB	3.2136	3.85078
MTF1	3.1487	3.85078
NPEPPS	3.0687	3.85078
HNRNPD	3.0404	3.85078
TSC1	3.0225	3.85078
ARID1A	3.0126	3.85078
CMIP	3.0084	3.85078
BPTF	2.8803	3.85078
PCGF1	2.7166	3.85078
MYO9A	2.6436	3.85078
DGKD	2.5968	3.85078
AAGAB	2.5402	3.85078
TMEM161B	2.4176	3.85078
GIPC1	2.4596	3.40782
PICALM	2.3691	3.40782
FHL2	2.253	3.40782
CTDSPL2	2.4708	3.20831
ZEB1	2.4215	3.20831
PTGES3	3.2383	2.96377
UBAP2L	2.3519	2.71829
PPP1R16A	2.1485	2.71829
SRGAP1	1.8073	2.71829
DR1	2.7854	2.49621
TIPRL	2.6896	2.26051
ARHGAP21	2.3456	2.20128
RB1	1.6415	2.20128
EIF3K	2.6666	2.18263
EPT1	3.0664	2.16545
METTL5	1.9031	2.11532
C14orf80	3.21	2.09447
TGFBR2	2.8831	2.09447
CYLD	2.7017	2.09447
BCORL1	2.0114	2.09447
KCTD9	1.9001	2.09447
ATXN2L	2.2876	2.04837
RNF40	3.7722	1.94493
LARP7	2.9072	1.82105
STX10	2.1981	1.82105
DRAP1	2.8384	1.8167
HEXIM1	2.5624	1.8167
MAPK14	2.2608	1.77224
LIN37	2.0192	1.74417
CNOT4	2.3979	1.67266
TUBD1	2.7051	1.63776
ERBB3	2.1508	1.57556
SPATA13	2.0048	1.57556
CLEC11A	1.7609	1.54541
TMSB4Y	2.2507	1.50658
NOSIP	1.7821	1.50658
UPF3B	1.6191	1.50658
HIF1A	2.1963	1.47232
OTUD6B	2.0321	1.46957
DHX29	2.5924	1.43926
PPP2R4	2.7089	1.37725
TMEM242	2.2294	1.37725
WASL	2.1022	1.37725
HDAC3	3.3343	1.35975
WDR81	1.8695	1.35535
CDKN2A	1.7082	1.32679
HSF1	2.0233	1.31337
SPEN	1.4992	1.30482
CUL3	2.4829	1.30283
ANKRD23	1.6497	1.30283
KMT2D	1.5763	1.30283
C2orf73	2.5033	1.28156
COPS4	3.5333	1.24657
INO80D	2.1523	1.24657
ZNF384	2.0687	1.22177
GCN1L1	2.5135	1.21876
ETNK1	1.9073	1.21876
LSM12	2.1286	1.19792
CUX1	1.3709	1.18122
FIP1L1	2.9516	1.17014
XRN1	2.4285	1.14806
LEO1	1.9636	1.11401
PPM1F	1.9717	1.09545
RQCD1	1.933	1.09335
BTAF1	2.3165	1.08918
PAF1	2.255	1.08153
TAOK1	1.958	1.06868
TF	1.7108	1.06461
KCTD10	3.2728	1.05875
MMD	1.8188	1.05215
RPRD2	1.822	1.03773
AJUBA	1.8489	1.02917
CNOT2	2.6674	0.988091
CNOT11	2.1378	0.988091
HDAC8	2.0736	0.969619
E2F7	1.646	0.946499
ATF7	1.377	0.946499
WAC	2.3014	0.899492
BTBD9	2.0478	0.890526
AP2A1	1.4402	0.885322
HTR1D	2.2766	0.881755
TRIP12	2.0711	0.881755
PRR13	1.6952	0.86575
SETD1B	2.0874	0.818725
WDR83	2.4923	0.807385
PTPN12	1.3591	0.802788
GORASP2	1.87	0.801203
NFKB2	1.7306	0.800091
SCAF8	2.494	0.783457
NUFIP2	1.9528	0.783457
CTNNA1	1.9422	0.783457
GAK	1.7833	0.783457
AVIL	1.4664	0.783457
UBE2L3	2.8824	0.776356
CDC73	2.3245	0.766372
GPD1L	1.3034	0.762421
LOXL1	1.1194	0.725136
PRRC2C	1.736	0.719847
MAP3K10	1.1598	0.710728
UBXN4	1.8293	0.683713
SMARCC1	2.1213	0.682787
TUBE1	2.1083	0.678445
CRNN	1.8713	0.678445
TBK1	1.4996	0.674214
JAK1	2.443	0.668219
BCL7A	1.7655	0.664356
PHKB	1.3083	0.656442
EIF3L	2.2985	0.654491
IFNA17	2.0267	0.654491
KHSRP	2.0342	0.637516
G3BP2	1.5865	0.637516
AP3S2	2.45	0.624911
KHNYN	1.2377	0.619852
POTEJ	1.6067	0.619338
GNPTAB	1.5594	0.610458
SLC8A2	1.429	0.610458
FGF11	1.1122	0.610458
RPS6KA3	1.7644	0.609588
HOXC13	1.6584	0.609588
METTL7A	1.321	0.609588
NFRKB	2.3	0.595726
GK5	1.7008	0.595726
OR5P2	1.5232	0.590354
SEC14L1	1.5188	0.588875
CSRNP2	1.8305	0.586383
FIG4	1.8582	0.576921
GUSB	1.1963	0.567777
C5orf24	1.7959	0.567125
GLRX5	3.0055	0.562598
FETUB	1.9692	0.562598
SAV1	1.7915	0.562598
SH3BP4	1.6475	0.562598
OLA1	1.3571	0.562598
THAP4	1.1604	0.56099
SCAF1	2.1431	0.550815
SLC25A3	1.9212	0.550815
ZNF121	1.6383	0.547665
FOXRED1	2.884	0.541967
C2orf44	1.9069	0.541967
FAM129B	2.1508	0.534625
SMPDL3A	1.3597	0.534625
TRAF3	1.9092	0.530361
SPOCD1	1.2426	0.530179
CDHR1	1.3874	0.528131
CATIP	1.6557	0.521408
CDC37L1	1.7929	0.520922
P2RY8	1.5425	0.520922
LURAP1L	1.7469	0.500983
MYO9B	1.1103	0.500983
ARRDC3	1.5748	0.497451
NDUFA6	3.14	0.489538
MMP7	1.7216	0.487536
SNRNP70	2.248	0.4772
EIF5A2	1.7545	0.4772
COL23A1	1.243	0.4772
ZMIZ1	1.8496	0.465814
PRPS1	1.7955	0.465814
ITGB1BP1	1.3964	0.44855
PIP5K1A	1.9418	0.446198
ARIH2	1.3335	0.446198
CAB39	3.1819	0.43585
AMOTL2	2.2152	0.43049
CREBBP	1.9016	0.43049
HYAL2	1.7046	0.43049
DDIT4	1.5004	0.43049
RNASE12	1.3693	0.43049
FTCD	1.2814	0.43049
CPXCR1	1.3881	0.424678
OR5W2	0.68983	0.419718
CCDC74A	1.9233	0.413879
MRM1	1.518	0.413879
CCNG2	1.7465	0.4098
TDG	2.2162	0.40658
TFAP2A	1.9446	0.40658
NR2C2	1.4742	0.40658
HOXA9	1.417	0.40658
SLC43A3	1.0612	0.39953
PHF14	1.3987	0.396112
CHCHD1	1.684	0.391908
PCED1B	1.0833	0.386273
PNISR	2.2095	0.381383
POU2F1	1.8151	0.380763
RBM5	1.5507	0.376327
CBX5	1.3191	0.376327
KRTAP9-8	1.1764	0.376327
CACNA2D4	1.4751	0.362009
STK32B	1.6699	0.359609
TRNP1	1.5092	0.359609
SIAH2	1.787	0.35027
PPM1B	1.0849	0.348905
UPF2	2.2309	0.34849
CPM	1.2123	0.346478
CDH24	1.7612	0.338654
CAPRIN1	2.2211	0.33336
E2F6	2.027	0.33336
TRIM48	1.8933	0.33336
ENTPD6	1.6043	0.33336
ZBED4	0.88707	0.327883
OR2T4	1.6268	0.320805
OR5AP2	1.1415	0.320805
TTC27	-0.76089	0.320805
WWC1	1.0471	0.319714
KLK13	1.506	0.319196
MBNL1	1.4441	0.319196
HEXDC	0.92962	0.319196
KLHL42	1.5578	0.315433
FBXL5	1.854	0.314877
ARHGAP9	1.6786	0.314361
AICDA	1.355	0.314361
CDRT1	1.4559	0.309233
RGS6	1.7744	0.306943
SLC8B1	1.7264	0.298877
LGALS1	1.2768	0.295705
KLHL12	1.1254	0.295103
ESM1	0.94512	0.295103
ANKRD11	1.9007	0.289256
SLC6A12	1.4166	0.289256
CIART	1.2389	0.289256
CHML	1.1461	0.289256
ACYP2	0.90641	0.286569
UGT2B7	1.523	0.285359
SETDB1	1.7139	0.28491
ASIC1	1.33	0.28491
IL20	1.1293	0.28491
DTWD2	1.0709	0.28491
GTF2E2	2.2171	0.276427
UNC45A	1.953	0.276427
ZNF512	1.8954	0.276427
COX14	1.6737	0.276427
IQSEC3	1.0433	0.276427
CEBPA	1.3204	0.272034
KLK15	1.8276	0.272031
TCERG1	1.7947	0.272031
PPME1	1.7578	0.272031
ACTR2	1.6741	0.272031
PHLPP1	1.1416	0.272031
C12orf65	1.8512	0.270083
SLC9A6	1.8589	0.266584
AFAP1L1	1.2023	0.26533
SATB2	1.5867	0.263542
ZBTB39	1.3339	0.260553
FCHO2	1.7274	0.259633
TMEM185B	1.3881	0.253672
KHDRBS1	1.9123	0.25009
MED14	1.6035	0.25009
ZC3HAV1	1.5669	0.25009
SMARCD1	1.7195	0.246479
PLEKHB1	1.4436	0.246479
C12orf29	1.3303	0.246479
PLEKHG6	0.72358	0.244733
DPF2	2.0517	0.242008
AGXT	1.7928	0.241303
HDGFRP2	1.7908	0.241303
BAZ1A	1.7787	0.241303
H1FNT	1.7083	0.241303
CCL5	1.6993	0.241303
C12orf66	1.6587	0.241303
CDO1	1.5523	0.241303
KCNMB3	1.5517	0.241303
GIPC2	1.4511	0.241303
GALNT4	1.4353	0.241303
DEF8	1.3486	0.241303
TWSG1	1.3221	0.241303
SOD3	1.1705	0.241303
OSBP2	1.1482	0.241303
CCNF	1.1125	0.241303
CD180	0.26861	0.241303
CXCR2	1.7042	0.239587
NFE2	1.2063	0.239587
GABRG2	1.1887	0.239587
JAM3	1.1738	0.239587
OR52H1	1.3699	0.234346
NFIB	1.2195	0.234244
AGTR2	0.062347	0.234244
RSBN1L	1.5839	0.233956
SMG5	2.23	0.230016
FAM49A	1.0297	0.229898
GLE1	0.34271	0.229898
DSPP	1.4969	0.229133
CLK1	1.291	0.229133
STX2	1.2716	0.227096
CDH19	0.99383	0.227096
THRB	1.4061	0.223209
PAXIP1	2.3114	0.218803
PPEF2	1.2839	0.218803
CUL5	1.0164	0.218803
TNK1	-0.24792	0.218803
FOXN1	1.2312	0.214006
SLC35D1	1.4456	0.206099
ZCCHC8	1.5427	0.205902
AGTR1	1.3904	0.205902
KHK	2	0.203277
FAM57B	1.6926	0.203277
SPACA1	1.6744	0.203277
SLC11A2	1.4708	0.203277
SPATC1	1.1948	0.203277
KDM3B	1.1563	0.203277
ELK3	1.0488	0.203277
MYO7B	1.5628	0.202631
HELZ2	1.4424	0.202631
HAS3	1.2448	0.198413
IRF1	0.18347	0.198413
SOCS6	1.435	0.198412
REN	1.0402	0.198412
IBA57	2.3193	0.198055
GLS2	1.9439	0.198055
TUBB6	1.8977	0.198055
CST1	1.7436	0.198055
MBD6	1.6722	0.198055
COX18	1.6699	0.198055
HNRNPH2	1.6544	0.198055
PKP4	1.5781	0.198055
DAZAP1	1.4212	0.198055
HECW2	1.4134	0.198055
TCTN2	1.3099	0.198055
PMCH	1.2384	0.198055
KDM7A	1.0146	0.198055
DNAH14	0.97371	0.198055
GDF2	0.15987	0.198055
RTTN	1.7729	0.197467
KIF2B	1.1128	0.197467
METTL14	0.7669	0.197467
LAMTOR2	1.8892	0.196785
CMTR2	1.6781	0.196785
TIMD4	1.654	0.196785
GAS2	1.4428	0.196785
36951	0.98286	0.196785
C17orf49	1.3797	0.196351
RAB7B	1.25	0.196351
OR1L1	0.55315	0.196351
PAGR1	1.8305	0.192679
IQGAP1	1.7119	0.192679
PPIL3	1.6827	0.192679
MRGPRD	1.4483	0.192679
CATSPER3	1.3507	0.192679
ARPC4	1.2152	0.192679
EPYC	0.78801	0.19237
DTX3	1.4693	0.191811
SLC4A8	1.0601	0.191274
VWF	1.6082	0.190989
ANAPC15	1.6831	0.186304
GHRL	1.5472	0.186304
GTF2IRD1	0.24515	0.186304
SHISA4	0.9534	0.183832
TJP2	1.6671	0.183303
SPINK4	0.8028	0.183303
SMARCE1	1.2414	0.178747
CHST10	1.5782	0.17638
EDF1	1.5282	0.173621
KRT81	1.3923	0.173433
ARIH1	0.89691	0.170235
MTO1	2.6127	0.170178
ZNF706	1.2187	0.170178
NMT1	2.222	0.168872
HACD4	1.9401	0.168872
FGFR1OP	1.7611	0.168872
GLS	1.5412	0.168872
MYH2	1.4917	0.168872
ADAMTS20	1.1896	0.168872
C1orf233	-0.069065	0.168872
IL6R	1.7401	0.167296
MTIF3	1.7326	0.167296
ACBD4	1.4433	0.167296
CNTN1	1.2501	0.167296
HOXD4	1.0731	0.167296
METTL20	1.0353	0.167296
FKBP1B	1.0291	0.167296
ZNF428	0.98718	0.167296
TMX2	2.018	0.163685
CHIT1	1.1852	0.163685
ZNF736	0.56106	0.163685
SPPL2B	1.468	0.163285
FAM196B	1.4398	0.163285
LANCL1	1.3402	0.163285
CEP120	1.8555	0.163006
OR56A3	0.30695	0.163006
FSTL5	1.3988	0.162019
KRT16	0.9135	0.162019
MCC	0.87417	0.161681
SCG2	1.6676	0.160024
TBPL2	1.9062	0.157504
MARCKS	1.855	0.152573
SORCS2	1.1348	0.152573
PIP4K2C	1.8645	0.15067
PROZ	1.6364	0.15067
GPR119	1.5202	0.15067
NDUFA4L2	1.446	0.15067
LRRC40	1.4277	0.15067
AP1AR	1.3084	0.15067
OMG	1.2939	0.15067
GDF3	1.2796	0.15067
DCXR	1.271	0.15067
GPAT2	1.1789	0.15067
LRRC29	1.0102	0.15067
SPATA45	0.91794	0.15067
NAB2	0.89285	0.15067
ABCB4	-0.52797	0.15067
CHST4	1.5879	0.150301
GPR84	1.4102	0.150301
OR4L1	1.1812	0.150301
MFSD9	1.1484	0.150301
HOXC4	1.451	0.149398
DLC1	1.2978	0.149398
ERVMER34-1	1.4333	0.14811
SULT2A1	1.0163	0.144603
ENDOU	1.3735	0.142329
NSUN2	1.4971	0.141472
RBFOX2	1.4362	0.141472
CCL24	1.3971	0.141472
ERICH5	1.2366	0.141472
LYG1	1.0047	0.141472
ZDHHC9	1.5084	0.141374
DRAM2	1.4503	0.141374
SNX13	1.3949	0.141374
PATE4	1.3445	0.141374
SERPINE2	1.0987	0.141374
EFNA5	1.8602	0.140534
RNF7	1.3817	0.140534
CCL18	1.2056	0.140534
LVRN	1.1837	0.140534
RBMXL1	1.5729	0.139376
C1QTNF8	1.5371	0.139376
IGFBP7	1.5245	0.139376
GSTO1	1.5054	0.139376
GPR143	1.4812	0.139376
CHST11	1.4346	0.139376
DEPDC5	1.4074	0.139376
CERS6	1.3676	0.139376
C8B	1.3528	0.139376
PARD3B	1.3457	0.139376
ARID2	1.3288	0.139376
KCNK13	1.2063	0.139376
TRAK2	1.1444	0.139376
MYBPC1	1.1069	0.139376
MYOC	1.0776	0.139376
CASK	0.93041	0.139376
ATP4A	0.86009	0.139376
ZNF697	0.81558	0.139376
CUL4A	0.662	0.139376
POTEA	1.5323	0.137395
INO80	-0.29618	0.137395
UBE2A	1.8743	0.134715
SEL1L	1.7837	0.134685
GUCY2F	1.7155	0.134685
RRAGA	1.4313	0.134685
PERP	1.1798	0.134685
ATF7IP	1.1137	0.134685
RORC	1.0906	0.134685
MFSD6	1.0355	0.134685
OR3A3	0.95165	0.134685
NEDD4L	-2.1739	0.134685
CYTH3	1.5176	0.131236
TMEM57	1.1611	0.131236
N4BP2	0.5965	0.131236
HSPB7	1.7476	0.131086
HIPK2	1.2883	0.131086
SNX20	1.1279	0.131086
ABHD16A	0.93063	0.131086
SMCR8	0.8735	0.131086
40603	1.3884	0.130763
SLC30A7	1.0719	0.130763
HNRNPC	-1.4344	0.130561
AXIN1	1.6778	0.130361
MEPCE	2.3285	0.129883
ATPAF2	1.5423	0.129883
FAM178B	1.2115	0.129883
GZMA	1.1377	0.129883
TMEM183A	0.98118	0.129883
CHD9	0.80249	0.129883
PTX4	0.76349	0.129883
SHF	0.65541	0.129883
PCDHGA4	0.61182	0.129883
AHSG	1.6425	0.128765
ADM5	1.811	0.12726
PGRMC2	1.6156	0.12726
RBMS1	1.5854	0.12726
PLA2R1	1.5831	0.12726
OR5M10	1.5761	0.12726
PRR32	1.5595	0.12726
MAGOHB	1.4725	0.12726
IL23A	1.2738	0.12726
OR10Q1	1.2553	0.12726
KMT2C	1.2075	0.12726
NTN3	1.1717	0.12726
RSG1	1.1618	0.12726
ZNF839	1.1525	0.12726
PLEKHA6	1.0728	0.12726
IRF9	1.0301	0.12726
ORAI1	1.0063	0.12726
DDX60L	0.87503	0.12726
RIBC1	0.8688	0.12726
CYP4F8	0.79463	0.12726
PRPS1L1	0.71036	0.12726
CHD3	0.43141	0.12726
ACVR1C	0.3253	0.12726
POLR1E	0.0122	0.12726
ZNF710	-0.038805	0.12726
GFPT1	-0.051313	0.12726
COQ7	1.6131	0.126649
PPP6C	1.3667	0.125236
TMEM14B	1.4652	0.124788
PHTF2	1.3486	0.124788
TIPARP	1.3422	0.124788
FBXW10	1.0426	0.124788
GPR148	0.909	0.124788
SLC13A5	0.9019	0.124788
PRLH	0.18652	0.124788
PCGF6	-0.07338	0.124788
NDUFA9	2.9189	0.123567
CNOT10	2.0647	0.123567
TVP23C	2.0183	0.123567
CCER1	1.8309	0.123567
DET1	1.7779	0.123567
SNAPC1	1.7411	0.123567
DNAH10	1.7324	0.123567
UCHL5	1.7155	0.123567
PHF6	1.6968	0.123567
HOXC5	1.6805	0.123567
DNAJA2	1.6729	0.123567
SP7	1.6308	0.123567
PHC1	1.6173	0.123567
INO80E	1.5961	0.123567
TFPT	1.573	0.123567
EP300	1.5682	0.123567
OPRD1	1.5657	0.123567
LYPD6B	1.5537	0.123567
PCDHGB1	1.5427	0.123567
MRPS18C	1.5352	0.123567
DEK	1.5292	0.123567
MXRA7	1.5125	0.123567
MBLAC2	1.5105	0.123567
TCP11X2	1.504	0.123567
OMP	1.4922	0.123567
SNRPA	1.4874	0.123567
TMEM181	1.4834	0.123567
MTRNR2L6	1.4749	0.123567
CAMKK1	1.4694	0.123567
CREB3	1.4601	0.123567
HYAL1	1.4529	0.123567
CLEC3A	1.4247	0.123567
AXL	1.4147	0.123567
ARHGAP25	1.3716	0.123567
SIPA1	1.3662	0.123567
GLI2	1.3234	0.123567
SSMEM1	1.3176	0.123567
CNIH4	1.3053	0.123567
PPIA	1.302	0.123567
TBL1X	1.2992	0.123567
SIAE	1.2934	0.123567
TBR1	1.2821	0.123567
MON1B	1.2763	0.123567
ZNF827	1.2756	0.123567
ABHD4	1.2684	0.123567
DPY19L4	1.2306	0.123567
PCSK7	1.2289	0.123567
VCY1B	1.214	0.123567
ASTE1	1.1974	0.123567
ORC2	1.147	0.123567
TDRD3	1.1457	0.123567
NDUFB2	1.1436	0.123567
SP100	1.1354	0.123567
MYO5C	1.1313	0.123567
CTDSP1	1.1291	0.123567
CPNE8	1.1151	0.123567
SLC12A8	1.0978	0.123567
LNX1	1.0968	0.123567
LEMD3	1.0882	0.123567
DIRC2	1.0765	0.123567
USP44	1.0294	0.123567
RAB9A	1.0139	0.123567
LHFPL2	0.99837	0.123567
SYCE1	0.99212	0.123567
C19orf57	0.98632	0.123567
PPY	0.98331	0.123567
CACYBP	0.9471	0.123567
CHPT1	0.9289	0.123567
EFHD2	0.92215	0.123567
GSE1	0.87742	0.123567
PHLDA1	0.87088	0.123567
FOLH1B	0.87071	0.123567
CSNK2A2	0.85013	0.123567
FOXG1	0.84075	0.123567
HPD	0.81024	0.123567
ARFGEF1	0.80893	0.123567
MBD2	0.77316	0.123567
PTPN21	0.73867	0.123567
C7orf33	0.72917	0.123567
SIN3A	0.68532	0.123567
TIFAB	0.64687	0.123567
SPATS2L	0.61745	0.123567
PPFIA2	0.58781	0.123567
TRIM43	0.41502	0.123567
PLEKHF2	0.38413	0.123567
FOLR1	0.097697	0.123567
RUNX2	-0.0032295	0.123567
POSTN	-0.53501	0.123567
SNRPD2	-3.3083	0.123567
PDLIM7	1.8828	0.122691
MTNR1B	0.63789	0.122378
CNOT6L	0.98566	0.122113
TMPRSS7	0.60339	0.122113
BNC2	0.82356	0.1221
PPP1R3C	-0.59343	0.1221
FRMPD2	1.6861	0.121069
LYSMD3	1.5899	0.120961
TNFRSF1B	1.2034	0.120961
TSPYL2	1.5102	0.120134
PHIP	2.1033	0.120043
COL12A1	1.7092	0.120043
KRT5	1.4894	0.120043
KLHL9	1.2682	0.120043
NASP	1.1822	0.120043
SLC22A31	0.98664	0.120043
UQCRB	3.0544	0.117905
PSMA4	2.1749	0.117905
NAT8	1.742	0.117905
ZCCHC12	1.713	0.117905
ZNF273	1.6784	0.117905
LCMT1	1.6671	0.117905
XAGE2	1.6599	0.117905
RBMS2	1.6569	0.117905
FMO4	1.6262	0.117905
JAM2	1.5689	0.117905
RHOF	1.5279	0.117905
ZIC2	1.5262	0.117905
C2orf66	1.5151	0.117905
SPPL3	1.4785	0.117905
ATP6V0D2	1.4617	0.117905
IFI27	1.4594	0.117905
ZC3H4	1.4392	0.117905
NAIF1	1.4182	0.117905
XPO6	1.3978	0.117905
SENP1	1.3946	0.117905
TNFSF12-TNFSF13	1.3871	0.117905
PFDN5	1.3732	0.117905
FERMT3	1.3565	0.117905
IQCE	1.3304	0.117905
ABHD12	1.326	0.117905
PTGR2	1.3172	0.117905
XAGE1E	1.31	0.117905
LRRC30	1.2754	0.117905
MTPN	1.2753	0.117905
CENPJ	1.268	0.117905
COPS7B	1.2603	0.117905
WDFY3	1.2474	0.117905
AGK	1.232	0.117905
CEP126	1.1891	0.117905
LTB4R	1.1828	0.117905
PER2	1.1741	0.117905
GDF11	1.169	0.117905
CD47	1.1595	0.117905
SHC4	1.1499	0.117905
TMEM134	1.1291	0.117905
UBE2F	1.1041	0.117905
ZNF419	1.0847	0.117905
CUX2	1.0847	0.117905
ESRRB	1.084	0.117905
SDCCAG3	1.0534	0.117905
SRD5A2	1.0455	0.117905
SERTAD2	1.0288	0.117905
CTAG2	0.97283	0.117905
WIF1	0.97224	0.117905
LIM2	0.94281	0.117905
RAI2	0.92735	0.117905
PSME2	0.92688	0.117905
VIL1	0.90283	0.117905
LCORL	0.89576	0.117905
ZDHHC20	0.89239	0.117905
LRIG2	0.89184	0.117905
ARHGEF25	0.85921	0.117905
NEU2	0.82206	0.117905
JCHAIN	0.82125	0.117905
FGFBP1	0.80993	0.117905
HMBOX1	0.77512	0.117905
OR1F1	0.75802	0.117905
KCTD17	0.72024	0.117905
TRIML1	0.70245	0.117905
CHCHD10	0.52451	0.117905
PRKG1	0.44731	0.117905
ARHGEF5	-0.3397	0.117905
EMC3	-0.34242	0.117905
ADRA1B	-0.46484	0.117905
ADORA2B	1.6022	0.117638
AMPD3	1.4955	0.116942
ZRANB2	1.2688	0.116942
FOXP3	0.95301	0.116104
C11orf68	0.81375	0.116104
C7orf72	1.2481	0.115881
HAVCR1	1.1985	0.114931
MPO	0.86474	0.113785
CTR9	1.968	0.113513
TXLNG	1.7282	0.113513
TRPC5	1.4776	0.113513
PPM1M	1.4627	0.113513
ZNF761	1.2946	0.113513
ZDHHC13	1.2828	0.113513
OR10AD1	1.2266	0.113513
GJA9	1.1905	0.113513
MS4A2	1.1397	0.113513
SH3GL1	0.96141	0.113513
LMO3	0.92337	0.113513
DENND5B	0.75744	0.113513
FOXE3	0.6521	0.113513
TIGD4	0.20063	0.113513
IL3	1.3602	0.113315
GNB2L1	3.1422	0.111935
CFAP20	1.8893	0.111935
MUL1	1.4136	0.111935
ZNF672	1.1622	0.111935
SENP8	1.1526	0.111935
OR2Y1	1.0862	0.111935
TRPC7	0.91566	0.111935
UBR2	0.90487	0.111935
EVPLL	0.80098	0.111935
ITPA	0.75928	0.111935
MYO15A	0.13343	0.111935
ZSWIM3	0.053055	0.111935
TK2	0.85018	0.111347
CYSLTR2	0.82004	0.111347
SBK2	0.7883	0.111347
LIPA	1.7235	0.110707
FBN2	1.6871	0.110707
MAP3K5	1.4025	0.110707
TECPR1	1.3136	0.110707
NR3C1	1.0589	0.110707
PTPRO	1.0512	0.110707
GPRC5B	1.0457	0.110707
BID	1.0204	0.110707
MTF2	0.85695	0.110707
H1FOO	0.7611	0.110707
MYH9	0.74365	0.110707
ZNF860	0.73268	0.110707
SMIM10	0.71685	0.110707
GPR3	0.64624	0.110707
CHI3L1	0.63441	0.110707
CRACR2A	1.9514	0.110238
STAT3	1.7284	0.110238
ZNF143	1.6831	0.110238
STK40	1.6387	0.110238
HAT1	1.4981	0.110238
PSG2	1.257	0.110238
AAAS	1.2085	0.110238
KRTAP6-1	0.89844	0.110238
ATP10A	0.87733	0.110238
CAPS2	0.86843	0.110238
ATG14	0.85512	0.110238
TNIP1	1.7478	0.108217
KIAA0040	1.1273	0.108217
CNNM4	0.93843	0.107793
TAC4	-0.85102	0.107427
TTC34	1.6761	0.107145
RNF175	1.2361	0.106586
TTC23	0.82897	0.106586
SPATS2	0.77012	0.106586
KDM6B	1.2922	0.106496
PLCZ1	1.6277	0.106428
CLUH	0.98617	0.106428
HERC1	0.90603	0.106428
TCAF1	-0.73533	0.106428
OR2F2	1.1513	0.106124
LAMTOR3	2.4557	0.105292
MED31	1.9314	0.105292
EIF3E	1.7898	0.105292
GTF3C1	1.745	0.105292
USP49	1.6476	0.105292
FBXL14	1.6296	0.105292
MRGPRX3	1.6122	0.105292
GAL	1.5907	0.105292
GOLGA7	1.5119	0.105292
KLHDC8A	1.496	0.105292
GPR37	1.4858	0.105292
MED25	1.4652	0.105292
FSHR	1.4649	0.105292
ZSWIM2	1.4311	0.105292
DKKL1	1.3665	0.105292
B3GALT5	1.3357	0.105292
VDR	1.3107	0.105292
TMEM244	1.2848	0.105292
PGBD4	1.2729	0.105292
VSIG10L	1.2576	0.105292
BHLHE40	1.2464	0.105292
C4orf27	1.2378	0.105292
SYNGR2	1.2168	0.105292
KRT72	1.2088	0.105292
NOD2	1.1981	0.105292
KRT79	1.1714	0.105292
KIF20B	1.1592	0.105292
GRIP2	1.1538	0.105292
SH2D4A	1.1394	0.105292
CYP27A1	1.133	0.105292
RAP2C	1.1294	0.105292
TMEM106C	1.0957	0.105292
OTUD5	1.0944	0.105292
TRABD2A	1.0672	0.105292
FNIP2	1.0653	0.105292
SOHLH2	1.0651	0.105292
GRHL1	1.0651	0.105292
C5AR1	1.0565	0.105292
CA9	1.0385	0.105292
TMCO2	0.99245	0.105292
OAS2	0.97238	0.105292
FAM71B	0.97029	0.105292
TSPO	0.95811	0.105292
LOC102724279	0.95081	0.105292
CNTNAP5	0.94107	0.105292
HMSD	0.93956	0.105292
EGFR	0.93816	0.105292
BEST2	0.89632	0.105292
SYT17	0.89421	0.105292
TAS1R3	0.8828	0.105292
C19orf81	0.8497	0.105292
DPP3	0.83374	0.105292
NEUROD4	0.82053	0.105292
TXNL1	0.81538	0.105292
DHRS4L1	0.6703	0.105292
ASB1	0.66659	0.105292
CDC14B	0.65715	0.105292
UGT1A3	0.62494	0.105292
RHOBTB2	0.19088	0.105292
SQLE	-1.0064	0.105292
ARHGEF1	1.6102	0.105232
SCEL	1.4788	0.105232
MLKL	1.4368	0.105232
RAB42	1.4053	0.105232
AOAH	1.3042	0.105232
C4BPA	1.1075	0.105232
TMEM204	1.0996	0.105232
EPHB2	0.89916	0.105232
KRT36	0.83463	0.105232
SPANXN3	0.79804	0.105232
RASAL1	0.76285	0.105232
ADIPOR2	0.67524	0.105232
C10orf105	0.64493	0.105232
CLECL1	-0.048144	0.105232
NDUFB4	2.2475	0.104008
GYPA	0.91289	0.103797
NSUN7	1.6131	0.102811
SPSB1	-0.14373	0.102811
GPR174	0.84999	0.102597
KLC4	1.163	0.10219
PRLHR	0.89205	0.10219
EDC4	1.2001	0.101891
AP1G2	1.4546	0.100969
CLRN1	1.6436	0.100894
ARHGEF4	1.4122	0.100894
ASCL2	1.411	0.100894
C1orf158	1.317	0.100894
SUSD5	1.2454	0.100894
SGTB	1.244	0.100894
BASP1	1.2408	0.100894
SLC39A12	1.2035	0.100894
IFNB1	1.0467	0.100894
SLC3A1	1.0108	0.100894
TESPA1	1.0081	0.100894
SYDE1	0.94099	0.100894
ITGA10	0.93603	0.100894
ZIC3	0.74127	0.100894
CSDC2	0.61604	0.100894
SAP18	-2.4992	0.100894
SLC1A2	1.3178	0.0999143
TP53TG3C	2.0009	0.0997001
TRIM33	1.1963	0.0997001
KRTAP13-1	1.1556	0.0995449
TBC1D24	1.1352	0.0994668
TMEM127	0.99329	0.0994668
ADAM7	0.70004	0.0994668
GPBP1L1	0.45718	0.098642
LSM1	1.64	0.0980178
ANO8	1.4715	0.0980178
FAM175A	1.4542	0.0980178
CCM2	1.2849	0.0980178
PPP4R2	1.249	0.0980178
NANS	1.1283	0.0980178
COX6B2	1.072	0.0980178
TMEM35	0.99532	0.0980178
TLR7	0.98641	0.0980178
HN1L	0.95506	0.0980178
PRDM5	0.88551	0.0980178
POLI	1.6084	0.0978736
IZUMO3	1.332	0.0978736
CHCHD5	1.2959	0.0978736
CD86	1.1642	0.0978736
LRRCC1	0.91071	0.0978736
EDRF1	0.82912	0.0978736
IRF2BP2	0.74107	0.0978736
LAMP2	0.69776	0.0978736
C14orf142	0.628	0.0978736
CHPF2	0.69416	0.096828
COPS5	2.0048	0.0968177
NDUFB3	1.635	0.0968177
ARID4B	1.4761	0.0968177
HCRTR1	1.3921	0.0968177
ADGRG7	1.3163	0.0968177
ZSCAN18	1.2848	0.0968177
DOK5	1.2769	0.0968177
TDGF1	1.2588	0.0968177
SYNE2	1.2277	0.0968177
TBX15	1.2142	0.0968177
TUB	1.2136	0.0968177
ALDH7A1	1.1848	0.0968177
UBE2G1	1.1589	0.0968177
OTUD6A	1.1344	0.0968177
TYW1B	1.1262	0.0968177
ZNF740	1.1119	0.0968177
DMP1	1.0771	0.0968177
SCRN2	1.025	0.0968177
TENM2	0.98659	0.0968177
DGAT2	0.9586	0.0968177
IKZF4	0.94736	0.0968177
FN3KRP	0.89785	0.0968177
NAV3	0.89127	0.0968177
DEFB103A	0.88347	0.0968177
KIAA1211L	0.8614	0.0968177
PRKD3	0.85317	0.0968177
PLCH2	0.80757	0.0968177
HS6ST3	0.77466	0.0968177
GCSAM	0.75959	0.0968177
EFNB3	0.75499	0.0968177
ASCL5	0.75327	0.0968177
VTI1B	0.74703	0.0968177
TNFRSF11B	0.67946	0.0968177
OSBPL7	0.65128	0.0968177
CD63	0.63799	0.0968177
PCP2	0.49833	0.0968177
MACF1	-0.20127	0.0968177
NXPH2	1.5046	0.096732
RSPH14	1.3881	0.096732
FLOT2	1.3862	0.096732
C1orf43	1.3383	0.096732
PPFIA1	1.1772	0.096732
MYO1H	1.0106	0.096732
FMOD	0.72703	0.096732
SEC16A	0.50626	0.096732
ZNF763	-0.25463	0.0957617
ZNF142	0.92008	0.0955463
ADAMTS18	0.87302	0.0941308
MAGI1	1.2288	0.093935
HSPBAP1	1.2184	0.093935
BAZ2B	1.1745	0.093935
GPC2	0.12772	0.093935
FAM193A	1.1231	0.092176
CASP8	1.0985	0.092176
WNT6	1.0532	0.092176
OR51F2	1.1017	0.0916641
FKBP7	1.458	0.0913434
ITGA5	0.69079	0.0909909
EPHX1	1.4695	0.0897391
MYL12B	1.4331	0.0897391
NUCKS1	1.4201	0.0897391
VSIG10	1.3792	0.0897391
SGK1	1.308	0.0897391
ASIC2	1.2213	0.0897391
IVL	1.1944	0.0897391
SP140L	1.1811	0.0897391
OR2Z1	1.1471	0.0897391
ART3	1.1389	0.0897391
MAN2C1	1.1212	0.0897391
LAMA5	1.1185	0.0897391
CPLX4	1.1173	0.0897391
TCHHL1	1.0806	0.0897391
WBSCR27	1.053	0.0897391
NKX2-6	1.0459	0.0897391
MSI2	1.0123	0.0897391
ANKRD34B	0.97873	0.0897391
CCDC124	0.95567	0.0897391
SYTL4	0.93124	0.0897391
CEBPE	0.9206	0.0897391
FUNDC1	0.89693	0.0897391
LAMA4	0.88755	0.0897391
H2BFM	0.87031	0.0897391
TTC25	0.63276	0.0897391
OOSP2	0.22651	0.0897391
SDR42E1	0.10333	0.0897391
PRAME	-0.10489	0.0897391
VPS54	1.8591	0.0896499
CRADD	1.276	0.0896499
PLA2G12A	1.0992	0.0896499
KRTAP9-6	0.9982	0.0896499
SPRED1	0.74524	0.0896499
EDAR	0.11129	0.0896499
FCHSD1	1.6251	0.0895592
ID2	1.3796	0.0895592
RDH5	1.1976	0.0895592
BACH1	1.3218	0.0881827
PCDHGA7	1.2949	0.0877051
GPR32	1.1173	0.0875579
OAT	1.4071	0.0870821
LAMC2	1.1884	0.0870821
ACADL	1.1604	0.0870821
OMD	1.0885	0.0870821
MT1HL1	1.0644	0.0870821
RIOK3	1.0126	0.0870821
PITPNM3	0.71561	0.0870821
SEC24D	1.1787	0.0863859
RFWD2	0.94567	0.0863859
MUS81	0.89264	0.0863859
C11orf53	0.81469	0.0863859
EDN1	0.77414	0.0863859
MGST3	0.56879	0.0863859
TMEM120B	1.2066	0.0860961
OR10J5	1.4627	0.0858928
NECAB1	0.91992	0.0857785
SERTAD1	1.778	0.0855696
NCK1	1.6446	0.0855696
NFIC	1.6362	0.0855696
LETMD1	1.6168	0.0855696
RBM26	1.5676	0.0855696
OR2D3	1.5647	0.0855696
SETD2	1.5562	0.0855696
LAMTOR5	1.5542	0.0855696
FAM162A	1.546	0.0855696
NDUFB6	1.5277	0.0855696
C4orf29	1.5004	0.0855696
CTNNAL1	1.4871	0.0855696
LEFTY2	1.487	0.0855696
ZNF664-FAM101A	1.4807	0.0855696
PIK3C2A	1.4788	0.0855696
NFKBIZ	1.4488	0.0855696
SIVA1	1.4383	0.0855696
YOD1	1.4298	0.0855696
BEND3	1.4197	0.0855696
GIMAP1	1.4145	0.0855696
SGK494	1.3927	0.0855696
ITM2B	1.3796	0.0855696
RABIF	1.3629	0.0855696
TBC1D32	1.3528	0.0855696
RBL2	1.3434	0.0855696
GLRA3	1.3393	0.0855696
ABCF2	1.3383	0.0855696
PRAMEF14	1.3377	0.0855696
B4GALNT3	1.3066	0.0855696
TENM4	1.3012	0.0855696
PRPH	1.2903	0.0855696
CNOT1	1.2821	0.0855696
POLE3	1.2718	0.0855696
KPNA4	1.2629	0.0855696
NABP2	1.2605	0.0855696
NR3C2	1.2377	0.0855696
NRGN	1.2291	0.0855696
CLLU1	1.228	0.0855696
EFCAB5	1.2279	0.0855696
WHSC1L1	1.2241	0.0855696
NFKBIA	1.2228	0.0855696
TRIOBP	1.2187	0.0855696
RHBG	1.216	0.0855696
MRFAP1L1	1.2139	0.0855696
ROPN1	1.2121	0.0855696
TICAM2	1.2102	0.0855696
XPNPEP2	1.1977	0.0855696
C10orf71	1.1871	0.0855696
SCAPER	1.172	0.0855696
PRKAA2	1.1698	0.0855696
GM2A	1.1584	0.0855696
M6PR	1.1569	0.0855696
CLDND2	1.1293	0.0855696
PFN2	1.127	0.0855696
ABHD15	1.1196	0.0855696
RBX1	1.1151	0.0855696
RMND5B	1.1121	0.0855696
HNRNPUL1	1.0971	0.0855696
MKRN2	1.0958	0.0855696
41883	1.0932	0.0855696
KIAA0825	1.0916	0.0855696
KLF17	1.09	0.0855696
PPIG	1.0769	0.0855696
NCK2	1.0735	0.0855696
SREK1IP1	1.0723	0.0855696
CYBRD1	1.0686	0.0855696
CDPF1	1.0591	0.0855696
CEBPD	1.0579	0.0855696
GH2	1.0393	0.0855696
JMJD1C	1.0257	0.0855696
ZNF709	1.0195	0.0855696
PIR	1.0193	0.0855696
SEL1L3	1.0172	0.0855696
PXDN	1.0131	0.0855696
DTD2	1.007	0.0855696
BOD1L2	0.99219	0.0855696
OR1S2	0.98172	0.0855696
TFG	0.97567	0.0855696
UTS2R	0.96137	0.0855696
FANK1	0.95813	0.0855696
LACRT	0.92569	0.0855696
SDK2	0.91377	0.0855696
PLCB2	0.90646	0.0855696
ZBTB21	0.90538	0.0855696
SNX9	0.90401	0.0855696
PTN	0.90169	0.0855696
CERCAM	0.90024	0.0855696
AMN1	0.89808	0.0855696
CES3	0.89576	0.0855696
ZNF775	0.89412	0.0855696
RNF145	0.89256	0.0855696
THUMPD3	0.88889	0.0855696
KIF14	0.88698	0.0855696
SRPK3	0.87575	0.0855696
FCRL3	0.86619	0.0855696
AVPR1A	0.8643	0.0855696
CDRT15	0.85657	0.0855696
UQCR11	0.85004	0.0855696
SLC36A1	0.83836	0.0855696
UGT3A2	0.82523	0.0855696
ACTA2	0.77512	0.0855696
HOMER2	0.75721	0.0855696
ACOX2	0.74699	0.0855696
CASP6	0.73169	0.0855696
DENND2D	0.72274	0.0855696
ZC3HAV1L	0.70475	0.0855696
ZNF606	0.70197	0.0855696
ZNF547	0.69101	0.0855696
APMAP	0.68082	0.0855696
FFAR1	0.67286	0.0855696
FUT3	0.62986	0.0855696
PRR30	0.60629	0.0855696
APOBEC3G	0.59878	0.0855696
CSNK2A1	0.58426	0.0855696
MTR	0.5821	0.0855696
OTOL1	0.58162	0.0855696
WDR45	0.53552	0.0855696
RHEBL1	0.52783	0.0855696
SCN2B	0.50758	0.0855696
PTEN	0.38909	0.0855696
GRIA4	0.32981	0.0855696
OR52M1	0.18617	0.0855696
ABCA1	0.15921	0.0855696
STT3A	-0.041495	0.0855696
IGIP	-0.1849	0.0855696
EVPL	-0.46591	0.0855696
PPAN-P2RY11	-1.139	0.0855696
ACTR3	1.3596	0.0851245
SLITRK5	1.225	0.0851245
SEMA3A	1.192	0.0851245
TSPO2	0.58219	0.0851245
VCAM1	0.43851	0.0851245
C14orf178	1.79	0.0846297
COPS8	1.6639	0.0846297
TBC1D23	1.6589	0.0846297
C1orf122	1.6458	0.0846297
CEP350	1.6319	0.0846297
PPP6R3	1.6062	0.0846297
SPATA22	1.5912	0.0846297
POTEI	1.5609	0.0846297
UGT2B11	1.5068	0.0846297
ZNF574	1.4937	0.0846297
RTEL1	1.4712	0.0846297
HUS1B	1.4399	0.0846297
SIGLEC14	1.4224	0.0846297
PAPLN	1.407	0.0846297
SPATA18	1.3987	0.0846297
SLC25A2	1.3569	0.0846297
SPRR2F	1.3518	0.0846297
RTP1	1.3516	0.0846297
CLPTM1L	1.3425	0.0846297
MYLK3	1.3338	0.0846297
TRIM3	1.3328	0.0846297
SNX4	1.3268	0.0846297
ZMPSTE24	1.2965	0.0846297
FBXO28	1.2677	0.0846297
ANKAR	1.255	0.0846297
THRSP	1.2517	0.0846297
LAMTOR4	1.2488	0.0846297
GNG10	1.2382	0.0846297
BHLHA9	1.2352	0.0846297
MAP2	1.2223	0.0846297
DEFB106A	1.2159	0.0846297
TCEAL7	1.2121	0.0846297
PUS10	1.1957	0.0846297
KRT6B	1.187	0.0846297
CC2D2A	1.1782	0.0846297
UNC13B	1.162	0.0846297
NSUN6	1.1533	0.0846297
FSIP2	1.1474	0.0846297
C12orf10	1.1459	0.0846297
OR5H15	1.1446	0.0846297
STMN2	1.1395	0.0846297
PCDHB6	1.1347	0.0846297
SLC36A2	1.1296	0.0846297
ZNF383	1.1196	0.0846297
EIF2AK3	1.1183	0.0846297
DEFB106B	1.1118	0.0846297
RALGAPA1	1.1066	0.0846297
SLCO2B1	1.0859	0.0846297
MIEF2	1.0826	0.0846297
ADORA2A	1.0717	0.0846297
DCAF12L1	1.0686	0.0846297
GTF2A1	1.0646	0.0846297
ADGRG2	1.0493	0.0846297
DCX	1.0344	0.0846297
ENO3	1.0224	0.0846297
PQLC2L	1.0159	0.0846297
RAB11A	1.0074	0.0846297
CCDC107	1.002	0.0846297
MAP2K3	0.98041	0.0846297
CCNJ	0.98015	0.0846297
PIK3CG	0.95553	0.0846297
CCSAP	0.94483	0.0846297
PTPN18	0.92893	0.0846297
POLE4	0.92429	0.0846297
FAM155B	0.92149	0.0846297
FOXK2	0.91722	0.0846297
SAP30L	0.91453	0.0846297
AMTN	0.8938	0.0846297
ZNF730	0.89255	0.0846297
AOC2	0.88404	0.0846297
ATP6V0A2	0.87837	0.0846297
SURF2	0.8637	0.0846297
DPRX	0.84846	0.0846297
MCAM	0.82725	0.0846297
FAM185A	0.81419	0.0846297
PGM5	0.81242	0.0846297
M1AP	0.81138	0.0846297
GLI1	0.80484	0.0846297
C5	0.80302	0.0846297
TBL1Y	0.79038	0.0846297
RHOBTB3	0.77169	0.0846297
VCX	0.72574	0.0846297
PCDHB9	0.72257	0.0846297
TM4SF1	0.67884	0.0846297
PLAC8	0.67531	0.0846297
OR2F1	0.57624	0.0846297
ADAMTSL4	0.57366	0.0846297
CCDC144NL	0.56731	0.0846297
ACTL9	0.56147	0.0846297
CCDC122	0.5402	0.0846297
FRMPD1	0.52651	0.0846297
KRT28	0.47295	0.0846297
TCAF2	0.44705	0.0846297
FNBP4	0.39606	0.0846297
SNRK	0.22133	0.0846297
BAIAP2L1	0.039666	0.0846297
C4orf47	-0.65791	0.0846297
PPP1R35	1.9259	0.0845115
ARIH2OS	0.069799	0.0845115
DNAJC21	1.7681	0.0825659
YLPM1	1.5811	0.0825659
WDR34	1.2459	0.0825659
PIGR	1.0917	0.0825659
CD302	1.0354	0.0825659
ACCS	1.0181	0.0825659
RAD52	0.82332	0.0825659
GNAZ	0.69541	0.0825659
LPPR2	0.66807	0.0825659
CALCOCO1	1.1641	0.0823727
YTHDF3	1.3264	0.0821108
KCNH7	1.2873	0.0821108
GPBAR1	1.167	0.0821108
NRIP1	1.1378	0.0821108
PGAM5	1.1332	0.0821108
NEFM	1.075	0.0821108
HIATL1	0.98776	0.0821108
EGR3	0.77197	0.0821108
RNASE10	0.67725	0.0821108
AGR2	0.58994	0.0821108
RENBP	0.52885	0.0821108
DHH	0.73493	0.0814895
SMARCA5	1.413	0.0813438
FAM168A	1.6228	0.0803828
ACSS3	1.3912	0.0803828
GSTZ1	1.3744	0.0803828
RFPL3	1.2453	0.0803828
C1RL	1.1965	0.0803828
STK36	1.1351	0.0803828
SP9	1.0006	0.0803828
MCCC2	0.99943	0.0803828
ODF3L2	0.9862	0.0803828
MAP4K1	0.94411	0.0803828
CCL20	0.94063	0.0803828
TAF9B	0.9115	0.0803828
FUK	0.89072	0.0803828
ARPIN	0.85992	0.0803828
OR5AU1	0.78512	0.0803828
PLEKHB2	0.76016	0.0803828
FAM167A	0.74389	0.0803828
APCDD1	0.6567	0.0803828
RUSC1	0.51808	0.0803828
C9orf62	0.49177	0.0803828
BLVRB	-0.13915	0.0803828
SYNDIG1L	-1.2146	0.0803828
PDAP1	2.0525	0.0802877
PRDX1	1.2466	0.0802877
RNF123	-0.17913	0.0802877
CENPB	1.6265	0.0791882
SLC17A8	1.3962	0.0791882
ITPKB	1.2912	0.0791882
SENP3	1.2272	0.0791882
LOC401052	1.1154	0.0791882
HEMK1	1.061	0.0791882
RNF151	0.66168	0.0788225
TRIB1	1.9762	0.078001
KATNB1	1.2615	0.078001
CLIP2	1.1871	0.078001
USP15	0.96337	0.078001
CDYL2	0.8292	0.078001
MOB2	0.98854	0.0770997
NECAB2	0.84243	0.0770997
MLF1	1.2826	0.07701
OR11H12	1.04	0.07701
VEGFB	-0.35002	0.07701
OTC	1.0486	0.0763038
SDPR	0.72536	0.0763038
RBPMS2	1.3301	0.0761024
ACVR2A	1.1553	0.0761024
MRPL21	1.1179	0.0761024
SMUG1	1.0966	0.0761024
IZUMO1R	1.0473	0.0761024
NLRP7	0.95034	0.0761024
OXCT1	0.93267	0.0761024
SMIM3	0.77967	0.0761024
HORMAD1	0.55078	0.0761024
CDK2AP1	-0.27887	0.0761024
HMG20A	1.4097	0.075985
NRP2	1.3067	0.075985
C2orf40	1.1005	0.075985
HCRT	-0.52855	0.075985
AP1S2	1.4986	0.075267
ZNF439	1.448	0.075267
ZDHHC5	1.0414	0.075267
ACTB	0.6432	0.075267
CTNNA2	1.3158	0.0747916
NPHP1	1.2869	0.0747916
TNR	1.2257	0.0747916
ANKRD50	1.1272	0.0747916
N4BP1	0.36582	0.0747916
WDR82	-0.45038	0.0747916
LRRC66	1.1681	0.0747694
NME1	0.99701	0.0747694
SYT10	0.091527	0.0747694
MED17	2.1678	0.0736555
PRODH2	1.356	0.0736555
MT1H	1.3242	0.0736555
NAIP	1.1127	0.0736555
WIBG	1.0648	0.0736555
S100A2	1.0193	0.0736555
HIST1H2BH	0.80202	0.0736555
BMP4	0.77981	0.0736555
KIDINS220	0.67815	0.0736555
CAMK2A	0.055213	0.0736555
RAF1	-0.0761	0.0736555
CPT1B	1.494	0.0729763
ZGPAT	0.84638	0.0729763
CD44	1.1392	0.0719756
DSP	0.9986	0.0719756
NKX6-2	1.504	0.0719023
COL6A1	1.3742	0.0719023
SEMA4A	1.2708	0.0719023
ABL2	1.2532	0.0719023
CD9	1.229	0.0719023
SGSH	1.2179	0.0719023
FRMPD4	1.1717	0.0719023
PPM1K	1.152	0.0719023
PLEK2	1.1412	0.0719023
CRYGC	1.0698	0.0719023
MAGI2	1.0462	0.0719023
CPE	0.97708	0.0719023
HSPA4	0.93317	0.0719023
DCT	0.80031	0.0719023
FAM186B	0.77435	0.0719023
C8orf22	0.75804	0.0719023
KCNT2	0.59888	0.0719023
GJA3	0.52141	0.0719023
NCALD	0.4846	0.0719023
IFNG	0.40488	0.0719023
NUTM2B	0.33132	0.0719023
POU2F2	-0.1378	0.0719023
TET2	-0.17901	0.0719023
RBBP5	-0.62524	0.0719023
RNF20	1.8947	0.0712386
OR8U1	1.6	0.0712386
POC1A	1.3819	0.0712386
TRAFD1	1.2882	0.0712386
CDKL2	1.2525	0.0712386
IMPG2	1.2422	0.0712386
CDC42SE1	1.2371	0.0712386
ALS2	1.2218	0.0712386
CCDC66	1.2049	0.0712386
GPR137C	1.1871	0.0712386
VNN3	1.1402	0.0712386
AK5	1.1311	0.0712386
C3orf33	1.0305	0.0712386
TBC1D30	0.94717	0.0712386
FBXO45	0.94424	0.0712386
LY86	0.93224	0.0712386
PIFO	0.91268	0.0712386
SIAH1	0.81391	0.0712386
DYTN	0.78924	0.0712386
SDR16C5	0.78356	0.0712386
ANKFN1	0.7436	0.0712386
C5orf15	0.70124	0.0712386
C11orf87	0.59746	0.0712386
OR6N1	0.57731	0.0712386
SLC6A2	0.52351	0.0712386
TLX3	0.24167	0.0712386
JPH4	-0.61037	0.0712386
ELL	-0.63461	0.0712386
SLC30A5	-0.708	0.0712386
MIS18BP1	-0.76973	0.0712386
DHRS9	1.2135	0.0711854
ANKS1A	0.90132	0.0711854
PRAP1	0.85557	0.0711854
TMEM115	0.71244	0.0711854
GLTSCR1L	0.96403	0.0706204
SPAG11B	1.1346	0.0699684
CBY3	1.0278	0.0699684
ZBTB37	0.8155	0.0699684
NKPD1	-0.44029	0.0699684
PTGFR	1.3884	0.0698908
KRT77	1.3454	0.0698908
CKMT1A	1.3113	0.0698908
RAB3IP	1.1451	0.0698908
HAPLN1	0.82302	0.0698908
KLRF1	0.23975	0.0698908
GPR179	0.91289	0.0696017
GATAD2B	0.5418	0.0696017
SH2D3C	1.2069	0.0693897
PPARG	0.93585	0.0693897
ATXN1	0.49013	0.0693897
HYOU1	1.5805	0.0690937
CLIP1	1.0543	0.0690937
CNPPD1	1.0457	0.0690937
COQ10B	1.0067	0.0690937
ANKRD45	0.79557	0.0690937
MB21D2	-0.039708	0.0690937
PPP1R3F	0.90464	0.0690011
RETN	1.1972	0.0688743
TMA16	-0.23001	0.0688743
EN2	1.5947	0.0686683
PROX2	1.3613	0.0686683
CREB3L2	1.3481	0.0686683
SUSD6	1.3007	0.0686683
AHSA1	1.15	0.0686683
HECTD3	1.059	0.0686683
C1GALT1C1L	1.0189	0.0686683
ARL10	1.0033	0.0686683
SEMA3D	0.92615	0.0686683
PROC	0.904	0.0686683
NT5DC2	0.87498	0.0686683
OR6C4	0.85316	0.0686683
SLC7A3	0.80246	0.0686683
ZNF513	0.76823	0.0686683
MAP2K6	0.72157	0.0686683
CCK	0.65829	0.0686683
NANOS1	0.59592	0.0686683
WNT16	0.46467	0.0686683
MNDA	0.40735	0.0686683
CRY1	0.36971	0.0686683
NELFCD	0.16075	0.0686683
WFDC10B	-0.11782	0.0686683
RPAP1	-1.6281	0.0686683
SLC25A10	1.0225	0.068324
H3F3B	0.92203	0.068324
DLG3	0.95097	0.0679155
FKBP4	1.2314	0.0678257
WDR37	0.91297	0.0658683
SLC22A13	1.0718	0.065126
OR6C3	1.2603	0.0649378
CPAMD8	0.5398	0.0645275
GAD2	1.1537	0.0638448
ME3	1.3713	0.0634224
RASSF3	1.2868	0.0634224
CDCA7L	1.1869	0.0634224
NDP	0.8347	0.0634224
CSRP2	0.80521	0.0634224
PENK	0.76922	0.0634224
MGP	0.63727	0.0634224
C22orf34	0.47124	0.0634224
WISP1	0.23649	0.0634224
DDX39A	1.317	0.0632662
APP	1.3127	0.0632662
ZSCAN21	1.0938	0.0632662
SERPINB3	0.90167	0.0632662
OR11H4	0.73131	0.0632662
OR2AG1	0.49556	0.0632662
ZDHHC2	1.0668	0.062274
TARP	0.71933	0.062274
TXNRD1	1.7651	0.0621608
KRBOX1	1.6894	0.0621608
WDR86	1.4709	0.0621608
CNGA4	1.454	0.0621608
SLC6A13	1.4378	0.0621608
TXNRD2	1.4311	0.0621608
C17orf89	1.4257	0.0621608
TRPS1	1.3939	0.0621608
CYP19A1	1.3695	0.0621608
CD53	1.3273	0.0621608
CFC1	1.3131	0.0621608
ADCK1	1.2989	0.0621608
MSH2	1.2825	0.0621608
IFNA6	1.2824	0.0621608
MUC13	1.2736	0.0621608
ADPGK	1.2276	0.0621608
HPGDS	1.2245	0.0621608
SNAI3	1.2091	0.0621608
CDH4	1.1868	0.0621608
BBS9	1.1767	0.0621608
FSBP	1.1553	0.0621608
DSG4	1.1535	0.0621608
MTHFD2L	1.1411	0.0621608
NEK2	1.1142	0.0621608
SPPL2C	1.0959	0.0621608
BAZ2A	1.0931	0.0621608
INSL6	1.0919	0.0621608
SCNN1G	1.079	0.0621608
STARD9	1.0685	0.0621608
PCDHGC3	1.0665	0.0621608
CDC25A	1.0481	0.0621608
ULBP1	0.97554	0.0621608
IQSEC2	0.9472	0.0621608
SSX2	0.94213	0.0621608
KRT25	0.93249	0.0621608
TNRC6A	0.91379	0.0621608
HKR1	0.89905	0.0621608
SSSCA1	0.89444	0.0621608
SND1	0.88789	0.0621608
RHOB	0.86438	0.0621608
ANGPT1	0.85843	0.0621608
MITF	0.85347	0.0621608
FCHSD2	0.80891	0.0621608
SCN2A	0.8055	0.0621608
GRASP	0.803	0.0621608
RBM7	0.80299	0.0621608
PALM3	0.78262	0.0621608
PCDHB5	0.75541	0.0621608
HILPDA	0.74307	0.0621608
FAM204A	0.73467	0.0621608
ABCB11	0.69529	0.0621608
TNFRSF10A	0.6576	0.0621608
SULT1B1	0.6208	0.0621608
DPT	0.61128	0.0621608
DEFB116	0.57484	0.0621608
TRPC3	0.54059	0.0621608
ATPAF1	0.51295	0.0621608
RSRC2	0.43876	0.0621608
GCM1	0.36028	0.0621608
CSPG5	0.3394	0.0621608
TMEM218	0.31754	0.0621608
NCOR1	0.31344	0.0621608
NOSTRIN	0.29728	0.0621608
SERPINB10	0.22491	0.0621608
ARHGAP44	0.069264	0.0621608
CA12	0.0081385	0.0621608
PRDM14	-0.21403	0.0621608
KIAA1551	1.4114	0.0621112
NR5A2	1.2227	0.0621112
DCP2	1.1392	0.0621112
KDM4A	1.0896	0.0621112
MESP2	0.91157	0.0621112
GGN	0.73195	0.0621112
MPHOSPH8	0.70838	0.0621112
REG1B	0.6474	0.0621112
MED7	1.7792	0.062038
METRNL	0.3689	0.0619083
FAM98A	1.2407	0.0618557
PSIP1	0.57747	0.0618557
ENPEP	0.82192	0.061714
FAM153B	1.6167	0.061697
HSDL1	1.0671	0.061697
ALKBH4	0.79687	0.061697
TRIM15	0.57977	0.061697
ACTL6B	0.65762	0.0616054
PDHA2	1.1196	0.0615638
CTCF	1.4737	0.0613902
ZNF735	0.83704	0.0613902
RAPGEF6	0.76783	0.0613902
CCL21	1.3516	0.0608543
OR2A25	1.2242	0.0608543
LOC100996693	1.0117	0.0608543
CTNND1	0.94506	0.0608543
SCRN1	0.86618	0.0608543
DACT3	1.0075	0.0607983
C7orf50	1.2649	0.0607269
SGCB	1.2348	0.0607269
GAGE10	1.2225	0.0607269
FBXO33	1.1929	0.0607269
CT47A6	1.1816	0.0607269
ZFP1	1.0691	0.0607269
CHODL	1.0654	0.0607269
GIMAP7	1.0632	0.0607269
ATP6V1E2	1.0496	0.0607269
CCDC108	1.0445	0.0607269
OR6Y1	0.97668	0.0607269
37500	0.9546	0.0607269
WDR60	0.93976	0.0607269
DBT	0.8425	0.0607269
HK2	0.60954	0.0607269
HOXD9	0.57173	0.0607269
TRIM26	0.54941	0.0607269
OR9Q2	0.49461	0.0607269
TCL1A	0.49314	0.0607269
C1orf54	0.48895	0.0607269
P2RY6	0.47211	0.0607269
EEF2K	0.28013	0.0607269
PACS1	0.06973	0.0607269
KIAA1324L	1.4501	0.0604807
CD300LB	1.3948	0.0604807
MS4A6E	0.94695	0.0604807
TBC1D10A	0.7719	0.0604807
PLCG2	0.7422	0.0604807
SLC39A5	0.6087	0.0604807
OR1J4	0.57325	0.0604807
MTMR9	0.46364	0.0604807
ACYP1	0.90756	0.0595508
NEU1	1.4061	0.0593048
PRKAG1	0.9657	0.0593048
OR51A4	0.73241	0.0593048
CALCB	0.52861	0.0593048
ZNF2	0.84926	0.0591728
RNASE8	1.2361	0.0590833
RPE	1.2695	0.0583763
GJB2	1.1186	0.0583763
NKX3-1	1.1051	0.0583763
FEM1B	0.83437	0.0583763
CASC3	0.93486	0.0583475
OR5P3	-0.16806	0.0572932
IRF2BP1	1.2076	0.0572283
BCL9	1.1709	0.0572283
ADAMTS2	0.90393	0.0572283
NAT14	0.35463	0.0572283
CTAGE6	1.2075	0.0567341
MOB1A	1.1814	0.0567341
STAT5B	1.0645	0.0567341
KCNC2	0.71505	0.0567341
HIPK4	1.03	0.0566569
OCLM	0.8903	0.0566569
PYROXD2	0.56753	0.0566569
GIPR	1.4424	0.0563685
COL5A2	1.4002	0.0563685
SOX9	1.0123	0.0563685
PDZRN4	0.8992	0.0563685
GZMH	0.85268	0.0563685
C5orf34	0.7676	0.0563685
ANGPTL2	1.4927	0.0561376
KRTAP5-11	1.4123	0.0561376
KDM6A	1.3508	0.0561376
CACNB3	1.3219	0.0561376
VIPR1	1.3172	0.0561376
TPM3	1.3113	0.0561376
KDM2B	1.2887	0.0561376
MTFP1	1.2571	0.0561376
ADAM32	1.248	0.0561376
NIF3L1	1.2112	0.0561376
PRR14L	1.2038	0.0561376
HOXD11	1.195	0.0561376
SKI	1.1937	0.0561376
PDE11A	1.1877	0.0561376
ZNF768	1.1838	0.0561376
ZKSCAN3	1.168	0.0561376
GPRC5A	1.1134	0.0561376
ARPC2	1.1	0.0561376
SRRM3	1.096	0.0561376
SNTA1	1.0915	0.0561376
DPPA5	1.0751	0.0561376
POPDC2	1.0656	0.0561376
CCDC61	1.0627	0.0561376
CHST1	1.051	0.0561376
AKAP5	1.0488	0.0561376
CXorf23	1.0173	0.0561376
ZBTB44	1.0116	0.0561376
PLS3	1.0099	0.0561376
IL7	0.9801	0.0561376
DTX4	0.97055	0.0561376
HNRNPR	0.9621	0.0561376
LRWD1	0.95893	0.0561376
RNF144A	0.95852	0.0561376
ITGA7	0.95347	0.0561376
FBXL17	0.95225	0.0561376
CYSRT1	0.91906	0.0561376
PRPF40B	0.89735	0.0561376
CAMP	0.88205	0.0561376
TCHP	0.87661	0.0561376
ZFPM2	0.8684	0.0561376
ZC3HC1	0.85041	0.0561376
TMPO	0.84762	0.0561376
RGL1	0.823	0.0561376
ASUN	0.81075	0.0561376
SMG6	0.79734	0.0561376
IFT57	0.71591	0.0561376
CMAS	0.71461	0.0561376
RNF2	0.7001	0.0561376
AGFG2	0.67714	0.0561376
PPP2CB	0.64363	0.0561376
P2RX3	0.63324	0.0561376
ZNF518A	0.60511	0.0561376
FCAR	0.57063	0.0561376
OCA2	0.56931	0.0561376
HSD3B7	0.55515	0.0561376
VANGL2	0.54746	0.0561376
CCDC186	0.53033	0.0561376
TMEM71	0.51172	0.0561376
ELMO1	0.50056	0.0561376
DUSP2	0.48661	0.0561376
TARBP2	0.4621	0.0561376
ISM2	0.41364	0.0561376
KAZALD1	0.0081194	0.0561376
OR2T29	-0.039021	0.0561376
KRT37	-0.083829	0.0561376
SLC30A8	-0.25977	0.0561376
PSMD8	-1.3349	0.0561376
STIL	1.6471	0.0558111
SLC27A2	1.527	0.0558111
LIPT1	1.451	0.0558111
CCL3	1.4268	0.0558111
FAM177B	1.3908	0.0558111
TRPV6	1.3256	0.0558111
ASB7	1.3002	0.0558111
SECISBP2L	1.2919	0.0558111
SAMD9	1.2203	0.0558111
MCF2	1.1815	0.0558111
HERC3	1.1542	0.0558111
TMEM229B	1.14	0.0558111
KIFAP3	1.0549	0.0558111
KIAA1324	1.014	0.0558111
SCGB2B2	1.0096	0.0558111
TMBIM4	0.99894	0.0558111
PCDH8	0.98237	0.0558111
MAL2	0.97871	0.0558111
COMMD4	0.97795	0.0558111
RAB37	0.91179	0.0558111
EFNB1	0.89465	0.0558111
RASA3	0.89411	0.0558111
PGAP1	0.89262	0.0558111
TIGAR	0.88514	0.0558111
TMEM192	0.82967	0.0558111
CEACAM16	0.82466	0.0558111
FRMD4B	0.7652	0.0558111
IER5L	0.75093	0.0558111
ZDHHC22	0.74891	0.0558111
ZNF385A	0.74535	0.0558111
ADGRF1	0.72548	0.0558111
DGKH	0.7237	0.0558111
PLIN5	0.68849	0.0558111
CST9	0.68073	0.0558111
DEPDC1B	0.66019	0.0558111
FOXM1	0.6513	0.0558111
OR52N1	0.55487	0.0558111
INPP5J	0.52406	0.0558111
UBE4B	0.27323	0.0558111
GLIS2	0.053641	0.0558111
AHDC1	0.046071	0.0558111
OR4C12	-0.18393	0.0558111
CASD1	0.98588	0.055502
OR51A7	0.44757	0.055502
SLC25A14	1.2958	0.0547678
OR52B6	1.1256	0.0542179
ESRP2	0.95413	0.0542179
SLC41A2	0.68538	0.0542179
C1orf159	1.4411	0.054181
PPP3CB	0.95571	0.054181
PODXL2	0.42809	0.054181
PCDHB2	1.5274	0.0541515
BTF3L4	0.34501	0.0541515
ODF3	0.76271	0.0541465
NDUFA8	1.9338	0.0538854
ST6GAL2	1.5468	0.0538854
ZNF770	1.4338	0.0538854
PLSCR4	1.3609	0.0538854
FAM129A	1.3239	0.0538854
PRDM15	1.2809	0.0538854
PCDHGA8	1.2154	0.0538854
APBB2	1.2101	0.0538854
STARD3	1.1403	0.0538854
DMXL1	1.1323	0.0538854
OR2C3	1.1259	0.0538854
ADCK2	1.0952	0.0538854
MTMR12	1.0861	0.0538854
LCP1	1.0563	0.0538854
STK33	1.0402	0.0538854
DPEP2	1.0265	0.0538854
DECR2	1.009	0.0538854
KIAA1161	0.99648	0.0538854
P3H2	0.98885	0.0538854
C18orf42	0.96951	0.0538854
NOVA2	0.94687	0.0538854
KRT27	0.93568	0.0538854
PI4K2A	0.90828	0.0538854
CAPZA3	0.88819	0.0538854
ADRA2C	0.88112	0.0538854
CARD6	0.87951	0.0538854
ARID1B	0.87121	0.0538854
RGS9	0.84661	0.0538854
CLDN2	0.81976	0.0538854
KIF5A	0.81771	0.0538854
DEFA4	0.79762	0.0538854
ZNF317	0.74713	0.0538854
IL31	0.74639	0.0538854
POMT1	0.71155	0.0538854
RBM4B	0.69504	0.0538854
TBC1D25	0.63725	0.0538854
LDB2	0.61538	0.0538854
KLHL23	0.61485	0.0538854
BARHL1	0.55693	0.0538854
CLEC12B	0.52911	0.0538854
C12orf50	0.45044	0.0538854
NRIP3	-0.50497	0.0538854
PHC2	-0.61585	0.0538854
CWF19L1	1.379	0.0538682
GATA3	0.83661	0.0538682
C10orf99	1.1891	0.0537871
FAM169B	0.77751	0.0537871
ZC3H12B	1.0162	0.053703
CLEC4D	0.28624	0.053703
TSPAN5	1.3823	0.0534112
ALDH1A3	1.0706	0.0534112
ZNF444	0.76905	0.0534112
PMFBP1	0.74206	0.0534112
CNTLN	0.71281	0.0534112
TAS2R19	0.66319	0.0534112
NENF	1.5907	0.0533734
CCBE1	1.0168	0.0533734
SLC22A14	0.99929	0.0533734
CYLC1	0.90828	0.0533734
RAP1GAP2	0.82415	0.0533734
TAS2R9	0.7557	0.0533734
APEX2	0.51767	0.0533734
RHOA	-0.82314	0.0533734
GOLGA8N	1.3536	0.0532609
ATP5B	1.8605	0.0530911
PAX7	0.74602	0.0530474
NDUFAF6	0.99083	0.0529743
EXTL2	0.90672	0.0529743
ASCL1	0.89273	0.0529743
SPINK1	0.85943	0.0529743
STIM2	0.58923	0.0529743
TXNDC9	1.4671	0.0526942
OVOL2	-0.025857	0.0526942
NDUFAF2	1.0669	0.0524736
HBQ1	1.0137	0.0524736
CENPK	0.91626	0.0524736
GDAP1	1.1533	0.0523972
SLAMF1	1.1135	0.0523972
LRRC4C	1.0044	0.0523972
SH3BGR	0.96414	0.0523972
GYS1	0.87055	0.0523972
ZNF883	0.63728	0.0523972
RLTPR	0.56962	0.0523972
PLOD3	0.35976	0.0523972
ATP6V0E2	-0.26483	0.0523972
ZC3H18	1.3089	0.0523546
S100A5	1.3746	0.052071
PYY	1.15	0.052071
IGFBP6	0.87369	0.052071
BCO1	0.62586	0.052071
OR5M3	0.62153	0.052071
LRTM2	0.48227	0.052071
GABRQ	0.7416	0.0517113
DRD1	1.2928	0.0516995
SLC24A1	1.2274	0.0516995
WNT10A	1.3829	0.0515968
SERPINC1	1.3498	0.0515968
GPR55	0.4469	0.0515968
GTF2I	0.21585	0.0515968
RPP25	0.18397	0.0515968
CHRM5	-0.56248	0.0515968
ATP5A1	2.6534	0.051301
MT1A	1.3117	0.0510421
SLC29A2	1.2507	0.0510421
KCNJ14	1.1109	0.0510421
DRD4	0.82547	0.0510421
ZBED8	0.50842	0.0510421
C16orf59	1.1626	0.0504548
RAVER2	0.15384	0.0501033
NME6	1.6223	0.0500316
GFRAL	0.77	0.0497803
NINJ2	1.322	0.0493991
MADCAM1	1.2979	0.0493991
APOA1	1.0828	0.0493991
LRCH4	1.072	0.0493991
ALDH3A1	1.0338	0.0493991
ZNF460	1.031	0.0493991
MMP17	0.8331	0.0493991
CPSF7	0.8159	0.0493991
ATP2C1	0.78011	0.0493991
ZCCHC4	0.76209	0.0493991
CALM3	0.68817	0.0493991
ERICH6	0.61383	0.0493991
LRRC63	0.46436	0.0493991
NAT8L	0.44014	0.0493991
USP53	-0.51212	0.0493991
RIMKLB	1.3204	0.049131
BCL7C	0.97276	0.049131
DGAT1	0.84435	0.049131
IGSF21	0.82667	0.049131
ANGPTL1	0.70054	0.049131
GPC1	0.63393	0.049131
PSMB8	0.51966	0.049131
IER5	-0.35295	0.049131
TTC14	1.0228	0.0489059
HID1	1.3742	0.0485731
RBMY1B	1.2465	0.0485731
TOMM20L	1.1423	0.0485731
TCF20	1.0772	0.0485731
RGPD3	1.0631	0.0485731
MYBBP1A	1.0411	0.0485731
FAM63A	0.97537	0.0485731
LIMD1	0.94336	0.0485731
CLEC2D	0.90439	0.0485731
NR1I2	0.8983	0.0485731
SPOCK3	0.69492	0.0485731
SMR3A	0.58354	0.0485731
FMR1	0.49844	0.0485731
UBE2E3	0.2322	0.0485731
ERCC8	0.08541	0.0485731
SLC35E2	-0.35895	0.0485731
DDX28	1.5677	0.0485595
ZNF223	1.2606	0.0485595
FAM49B	1.0368	0.0485595
PCNP	0.95862	0.0485595
DUS4L	0.75409	0.0485595
AOX1	0.70459	0.0485595
ELMSAN1	0.5975	0.0485595
IFT88	0.5261	0.0485595
ULK1	0.99987	0.048209
PDE4B	0.88624	0.048209
C8orf87	0.82053	0.048209
RBM15	1.5875	0.0481896
TRIM6	1.1208	0.0481896
SYT15	0.3113	0.0481896
FOXD4L1	1.0663	0.0480887
FAM117B	1.041	0.0480887
CLEC4M	1.0061	0.0480887
SLC26A1	0.96447	0.0480887
C12orf71	0.93156	0.0480887
LHFP	0.8164	0.0480887
CHRD	0.81052	0.0480887
ATP2B1	0.66799	0.0480887
IGF2BP2	0.57346	0.0480887
OR11H2	0.53613	0.0480887
KRT40	0.42768	0.0480887
TAF10	0.13762	0.0480887
NDUFA2	2.431	0.0479737
SASS6	2.1306	0.0479737
ATP5O	1.9146	0.0479737
PARPBP	1.3311	0.0479737
SRSF6	1.3237	0.0479737
MAP1S	1.1517	0.0479737
OR8G5	1.1498	0.0479737
P2RY14	1.129	0.0479737
AGPAT1	1.1272	0.0479737
ZFYVE26	1.1057	0.0479737
PORCN	1.1002	0.0479737
PNLIPRP3	1.0909	0.0479737
TCF15	1.0752	0.0479737
FLI1	0.98054	0.0479737
NMRK1	0.88971	0.0479737
HLA-DPB1	0.86331	0.0479737
ABCC4	0.85948	0.0479737
ESR2	0.85768	0.0479737
ARFIP1	0.81539	0.0479737
DNPEP	0.79134	0.0479737
MAN2B2	0.78544	0.0479737
FAM92B	0.73118	0.0479737
LDLRAD1	0.69515	0.0479737
MANBA	0.69283	0.0479737
NYX	0.68488	0.0479737
CUEDC1	0.66517	0.0479737
AURKC	0.64298	0.0479737
SLC51B	0.62251	0.0479737
DNAH7	0.60406	0.0479737
PLAC1	0.57987	0.0479737
UFSP1	0.56057	0.0479737
AXIN2	0.52776	0.0479737
MAT2B	1.194	0.0476358
STAG1	1.0893	0.0476358
KLHL4	1.0602	0.0476358
KRT85	0.47494	0.0476358
[truncated: 18,110 more rows]
